# Supplementary material for: The niobium oxoazides [NbO(N3)3], [NbO(N3)3·2CH3CN], [(bipy)NbO(N3)3], Cs2[NbO(N3)5] and [PPh4]2[NbO(N3)5]
Source: Royal Society of Chemistry journal article supplement (doi:10.1039/c6dt01479h), 2016-01-01
Supplement: c6dt01479h1.pdf [file c6dt01479h1.pdf]

## Supporting Information

The Niobium Oxoazides  $[\text{NbO}(\text{N}_3)_3]$ ,  $[\text{NbO}(\text{N}_3)_3 \cdot 2\text{CH}_3\text{CN}]$ ,  
 $[(\text{bipy})\text{NbO}(\text{N}_3)_3]$ ,  $\text{Cs}_2[\text{NbO}(\text{N}_3)_5]$  and  $[\text{PPh}_4]_2[\text{NbO}(\text{N}_3)_5]$

Ralf Haiges,<sup>\*a</sup> Monica Vasiliu,<sup>b</sup> David A. Dixon,<sup>b</sup> and Karl O. Christe<sup>a</sup>

<sup>a</sup> Loker Hydrocarbon Research Institute and Department of Chemistry  
University of Southern California  
Los Angeles, CA 90089-1661 (USA)

<sup>b</sup> Department of Chemistry  
The University of Alabama  
Tuscaloosa, AL 35487, USA

# Contents

|                                                                                                                                                               |          |
|---------------------------------------------------------------------------------------------------------------------------------------------------------------|----------|
| <b>EXPERIMENTAL DETAILS .....</b>                                                                                                                             | <b>5</b> |
| General .....                                                                                                                                                 | 5        |
| Crystal Structure determinations .....                                                                                                                        | 5        |
| Preparation of $[\text{NbO}(\text{N}_3)_3 \cdot 2\text{CH}_3\text{CN}]$ .....                                                                                 | 6        |
| Preparation of $[\text{NbO}(\text{N}_3)_3]$ .....                                                                                                             | 6        |
| Preparation of $[(\text{bipy})\text{NbO}(\text{N}_3)_3]$ .....                                                                                                | 6        |
| Preparation of $\text{Cs}_2[\text{NbO}(\text{N}_3)_5]$ .....                                                                                                  | 7        |
| Preparation of $[\text{TPP}]_2[\text{NbO}(\text{N}_3)_5]$ .....                                                                                               | 7        |
| <b>CRYSTALLOGRAPHIC DETAILS .....</b>                                                                                                                         | <b>8</b> |
| Figure S1. Asymmetric unit in the crystal structure of $[(\text{bipy})\text{NbO}(\text{N}_3)_3]$ . .....                                                      | 8        |
| Figure S2. The unit cell in the crystal structure of $[(\text{bipy})\text{NbO}(\text{N}_3)_3]$ . .....                                                        | 8        |
| Figure S3. Asymmetric unit in the crystal structure of $\text{Cs}_2[\text{NbO}(\text{N}_3)_5]$ .....                                                          | 9        |
| Figure S4. The unit cell in the crystal structure of $\text{Cs}_2[\text{NbO}(\text{N}_3)_5]$ . .....                                                          | 9        |
| Figure S5. Asymmetric unit in the crystal structure of $[\text{PPh}_4]_2[\text{NbO}(\text{N}_3)_5]$ .....                                                     | 10       |
| Figure S6. The unit cell in the crystal structure of $[\text{PPh}_4]_2[\text{NbO}(\text{N}_3)_5]$ . .....                                                     | 10       |
| Table S1. Sample and crystal data for $[(\text{bipy})\text{NbO}(\text{N}_3)_3]$ . .....                                                                       | 11       |
| Table S2. Data collection and structure refinement for $[(\text{bipy})\text{NbO}(\text{N}_3)_3]$ .....                                                        | 12       |
| Table S3. Atomic coordinates and equivalent isotropic atomic displacement parameters ( $\text{\AA}^2$ ) for $[(\text{bipy})\text{NbO}(\text{N}_3)_3]$ . ..... | 13       |
| Table S4. Bond lengths ( $\text{\AA}$ ) for $[(\text{bipy})\text{NbO}(\text{N}_3)_3]$ . .....                                                                 | 14       |
| Table S5. Bond angles ( $^\circ$ ) for $[(\text{bipy})\text{NbO}(\text{N}_3)_3]$ .....                                                                        | 15       |
| Table S6. Torsion angles ( $^\circ$ ) for $[(\text{bipy})\text{NbO}(\text{N}_3)_3]$ . .....                                                                   | 16       |
| Table S7. Anisotropic atomic displacement parameters ( $\text{\AA}^2$ ) for $[(\text{bipy})\text{NbO}(\text{N}_3)_3]$ . .....                                 | 17       |
| Table S8. Hydrogen atomic coordinates and isotropic atomic displacement parameters ( $\text{\AA}^2$ ) for $[(\text{bipy})\text{NbO}(\text{N}_3)_3]$ . .....   | 18       |

|                                                                                                                                                                                    |           |
|------------------------------------------------------------------------------------------------------------------------------------------------------------------------------------|-----------|
| Table S9. Sample and crystal data for Cs <sub>2</sub> [NbO(N <sub>3</sub> ) <sub>5</sub> ].                                                                                        | 19        |
| Table S10. Data collection and structure refinement for Cs <sub>2</sub> [NbO(N <sub>3</sub> ) <sub>5</sub> ].                                                                      | 20        |
| Table S11. Atomic coordinates and equivalent isotropic atomic displacement parameters (Å <sup>2</sup> ) for Cs <sub>2</sub> [NbO(N <sub>3</sub> ) <sub>5</sub> ].                  | 21        |
| Table S12. Bond lengths (Å) for Cs <sub>2</sub> [NbO(N <sub>3</sub> ) <sub>5</sub> ].                                                                                              | 22        |
| Table S13. Bond angles (°) for Cs <sub>2</sub> [NbO(N <sub>3</sub> ) <sub>5</sub> ].                                                                                               | 23        |
| Table S14. Anisotropic atomic displacement parameters (Å <sup>2</sup> ) for Cs <sub>2</sub> [NbO(N <sub>3</sub> ) <sub>5</sub> ].                                                  | 26        |
| Table S15. Sample and crystal data for [PPh <sub>4</sub> ] <sub>2</sub> [NbO(N <sub>3</sub> ) <sub>5</sub> ].                                                                      | 27        |
| Table S16. Data collection and structure refinement for [PPh <sub>4</sub> ] <sub>2</sub> [NbO(N <sub>3</sub> ) <sub>5</sub> ].                                                     | 28        |
| Table S17. Atomic coordinates and equivalent isotropic atomic displacement parameters (Å <sup>2</sup> ) for [PPh <sub>4</sub> ] <sub>2</sub> [NbO(N <sub>3</sub> ) <sub>5</sub> ]. | 29        |
| Table S18. Bond lengths (Å) for [PPh <sub>4</sub> ] <sub>2</sub> [NbO(N <sub>3</sub> ) <sub>5</sub> ].                                                                             | 31        |
| Table S19. Bond angles (°) for [PPh <sub>4</sub> ] <sub>2</sub> [NbO(N <sub>3</sub> ) <sub>5</sub> ].                                                                              | 33        |
| Table S20. Anisotropic atomic displacement parameters (Å <sup>2</sup> ) for [PPh <sub>4</sub> ] <sub>2</sub> [NbO(N <sub>3</sub> ) <sub>5</sub> ].                                 | 36        |
| Table S21. Hydrogen atomic coordinates and isotropic atomic displacement parameters (Å <sup>2</sup> ) for [PPh <sub>4</sub> ] <sub>2</sub> [NbO(N <sub>3</sub> ) <sub>5</sub> ].   | 38        |
| <b>COMPUTATIONAL OPTIMIZED COORDINATES</b>                                                                                                                                         | <b>39</b> |
| Table S22. Geometry parameters: selective bond lengths in angstroms.                                                                                                               | 39        |
| Table S23. Selected Frequencies (ν) (cm <sup>-1</sup> ), IR Intensities (km/mol) for the N <sub>3</sub> groups and Nb-O.                                                           | 40        |
| Table S24. Reaction energies in kcal/mol.                                                                                                                                          | 41        |
| Table S25. Frequencies (cm <sup>-1</sup> ), IR Intensities (km/mol) and Raman Activities (Å <sup>4</sup> /amu).                                                                    | 42        |
| Figure S7: [NbO(N <sub>3</sub> ) <sub>3</sub> ·2CH <sub>3</sub> CN] structures.                                                                                                    | 55        |
| Figure S8: Optimized structure of [NbO(N <sub>3</sub> ) <sub>3</sub> ].                                                                                                            | 56        |
| Figure S9: Optimized structure of [(bipy)NbO(N <sub>3</sub> ) <sub>3</sub> ] 2(A).                                                                                                 | 57        |
| Figure S10: Optimized structure of [(bipy)NbO(N <sub>3</sub> ) <sub>3</sub> ] 2(B).                                                                                                | 59        |
| Figure S11: Optimized structure of [NbO(N <sub>3</sub> ) <sub>4</sub> ] 3(A).                                                                                                      | 61        |
| Figure S12: Optimized structure of [NbO(N <sub>3</sub> ) <sub>4</sub> ] 3(B).                                                                                                      | 62        |

|                                                                                                       |           |
|-------------------------------------------------------------------------------------------------------|-----------|
| Figure S13: Optimized structure of $[\text{NbO}(\text{N}_3)_4]^-$ 3(C).....                           | 63        |
| Figure S14: Optimized structure of $[\text{NbO}(\text{N}_3)_5]^{2-}$ 4(A).....                        | 64        |
| Figure S15: Optimized structure of $[\text{NbO}(\text{N}_3)_5]^{2-}$ 4(B).....                        | 65        |
| Figure S16: Optimized structure of $[\text{NbO}(\text{N}_3)_5]^{2-}$ 4(C).....                        | 67        |
| Figure S17: Optimized structure of $[\text{NbO}(\text{N}_3)_5]^{2-}$ 4(D).....                        | 68        |
| Figure S18: Optimized structure of $[\text{NbO}(\text{N}_3)_3 \cdot \text{CH}_3\text{CN}]$ 5(A).....  | 69        |
| Figure S19: Optimized structure of $[\text{NbO}(\text{N}_3)_3 \cdot \text{CH}_3\text{CN}]$ 5(B).....  | 70        |
| Figure S20: Optimized structure of $[\text{NbO}(\text{N}_3)_3 \cdot 2\text{CH}_3\text{CN}]$ 6(A)..... | 71        |
| Figure S21: Optimized structure of $[\text{NbO}(\text{N}_3)_3 \cdot 2\text{CH}_3\text{CN}]$ 6(B)..... | 72        |
| Figure S22: Optimized structure of $[\text{NbO}(\text{N}_3)_3 \cdot 2\text{CH}_3\text{CN}]$ 6(C)..... | 73        |
| Figure S23: Optimized structure of $[\text{NbO}(\text{N}_3)_3 \cdot 2\text{CH}_3\text{CN}]$ 6(D)..... | 74        |
| Figure S24: Optimized structure of $[\text{NbO}(\text{N}_3)_3 \cdot 2\text{CH}_3\text{CN}]$ 6(E)..... | 75        |
| Figure S25: Optimized structure of $[\text{NbO}(\text{N}_3)_3 \cdot 2\text{CH}_3\text{CN}]$ 6(F)..... | 76        |
| Figure S26: Optimized structure of $[\text{NbO}(\text{N}_3)_3 \cdot 2\text{CH}_3\text{CN}]$ 6(G)..... | 77        |
| Figure S27: Optimized structure of $[\text{NbO}(\text{N}_3)_3 \cdot 2\text{CH}_3\text{CN}]$ 6(H)..... | 78        |
| <b>LITERATURE</b> .....                                                                               | <b>78</b> |

## Experimental Details

### General

**Caution!** Polyazides are extremely shock-sensitive and can explode violently upon the slightest provocation. Because of the high energy content and the high detonation velocity of these azides, their explosions are particularly violent and can cause, even on a one mmol scale, significant damage. The use of appropriate safety precautions (safety shields, face shields, leather gloves, protective clothing, such as heavy leather welding suits and ear plugs) is mandatory. **Ignoring safety precautions can lead to serious injuries!**

**Materials and apparatus:** All reactions were carried out in Teflon-FEP ampules that were closed by stainless steel valves. Volatile materials were handled in a grease-less Pyrex glass vacuum lines equipped with Kontes® HI-VAC® valves. Non-volatile materials were handled in the dry nitrogen atmosphere of a glove box. NbOF<sub>3</sub> was prepared from NbF<sub>5</sub> (Alfa Aesar) and SiO<sub>2</sub> in anhydrous HF (Galaxy Chemicals). Me<sub>3</sub>SiN<sub>3</sub> (95%, TCI America) was purified by fractional condensation. SO<sub>2</sub> (Aldrich) was dried over CaH<sub>2</sub>. Acetonitrile (Aldrich) was dried over molecular sieves and freshly distilled prior to use. PPh<sub>4</sub>N<sub>3</sub> was prepared according to a literature procedure<sup>1</sup> and 2,2'-bipyridine (Aldrich) was used without further purification. The NMR spectra were recorded at 298 K on a Bruker AMX-500 spectrometer. Spectra were externally referenced to neat nitromethane for <sup>14</sup>N NMR spectra. Raman spectra were recorded in 5mm J. Young nmr tubes in the range 4000–80 cm<sup>-1</sup> on Bruker Equinox 55 FT-RA or Vertex 70/RAM II spectrophotometer, using Nd-YAG lasers at 1064 nm. Infrared spectra were recorded in the range 4000-400 cm<sup>-1</sup> on Bruker Alpha, Bruker Vertex 70, or Bruker Tensor FT-IR spectrometers using KBr pellets. The pellets were prepared inside the glove box using an Econo Press (Thermo Scientific) and transferred in a closed container to the spectrometer before placing them quickly into the sample compartment, which was purged with dry nitrogen to minimize exposure to atmospheric moisture and potential hydrolysis of the sample. Neat grinding of the friction sensitive polyazides must be avoided. The azides were added to the finely powdered KBr and blended into the KBr using a non-metallic spatula. DTA curves were recorded with a purge of dry nitrogen gas on an OZM Research DTA552-Ex instrument with the Meavy 2.2.0 software. The heating rate was 5 °C/min and the sample size was 5-25 mg. The impact and friction sensitivity data were determined on an OZM Research BAM Fall Hammer BFH-10 and an OZM Research BAM Friction apparatus FSKM-10, respectively. Both instruments were calibrated using RDX.

### Crystal Structure determinations

The single-crystal X-ray diffraction data were collected on a Bruker SMART APEX DUO 3-circle platform diffractometer, equipped with an APEX II CCD, using Mo K $\alpha$  radiation (TRIUMPH curved-crystal monochromator) from a fine-focus tube. The diffractometer was equipped with an Oxford Cryosystems Cryostream 700 apparatus for low-temperature data collection. The frames were integrated using the SAINT algorithm to give the *hkl* files corrected for Lp/decay.<sup>2</sup> The absorption correction was performed using the SADABS program.<sup>3,4</sup> The structures were solved by the direct method and refined on *F*<sup>2</sup> using the Bruker SHELXTL Software Package and ShelXle.<sup>5-8</sup> All non-hydrogen atoms were refined anisotropically. ORTEP drawings were prepared using the ORTEP-3 for Windows V2.02 program.<sup>9</sup> Further crystallographic details can be obtained from the Cambridge Crystallographic Data Centre (CCDC, 12 Union Road, Cambridge CB21EZ, UK (Fax: (+44) 1223-336-033; e-mail: deposit@ccdc.cam.ac.uk) on quoting the deposition no. CCDC 1419751-1419753.

### Preparation of $[\text{NbO}(\text{N}_3)_3 \cdot 2\text{CH}_3\text{CN}]$

A sample of  $[\text{NbOF}_3]$  (133 mg; 0.80 mmol) was loaded into a Teflon-FEP ampule, followed by the addition of  $\text{CH}_3\text{CN}$  (1.2 mL) and  $\text{Me}_3\text{SiN}_3$  (402 mg, 3.50 mmol) *in vacuo* at  $-196^\circ\text{C}$ . The mixture was warmed to  $-20^\circ\text{C}$ . After 2 hours, a light yellow solution was obtained and all volatile materials were pumped off, first at  $-20^\circ\text{C}$  and then later at ambient temperature, leaving behind yellow solid  $[\text{NbO}(\text{N}_3)_3 \cdot 2\text{CH}_3\text{CN}]$  (243 mg; weight expected for 0.80 mmol  $[\text{NbO}(\text{N}_3)_3 \cdot 2\text{CH}_3\text{CN}]$ : 254 mg). DTA:  $131^\circ\text{C}$  (onset, explosion); impact sensitivity:  $<1\text{ J}$ , friction sensitivity:  $<5\text{ N}$ ;  $^{14}\text{N}$  NMR ( $\text{SO}_2$ ,  $25^\circ\text{C}$ )  $\delta = -135\text{ ppm}$  ( $\text{CH}_3\text{CN}$ ),  $-145\text{ ppm}$  ( $\Delta\nu_{1/2} = 50\text{ Hz}$ ) ( $\text{N}_\beta$ ),  $-207\text{ ppm}$  ( $\Delta\nu_{1/2} = 90\text{ Hz}$ ) ( $\text{N}_\gamma$ ),  $-313\text{ ppm}$  ( $\Delta\nu_{1/2} = 700\text{ Hz}$ ) ( $\text{N}_\alpha$ ); Raman ( $20^\circ\text{C}$ ,  $20\text{ mW}$ )  $\tilde{\nu} = 2940$  (6.2); 2268 (2.2); 2157 (10.0); 2125 (6.7); 2058 (2.2); 1371 (1.5); 1267 (0.6); 961 (0.6); 875 (0.8); 725 (2.0); 689 (2.7); 608 (2.1); 531 (1.0); 456 (5.3); 390 (1.2); 273 (0.5); 224 (0.8)  $\text{cm}^{-1}$ ; IR (KBr)  $\tilde{\nu} = 2998$  (vw); 2931 (w); 2312 (vw); 2288 (w); 2252 (vw); 2135 (vs); 2087 (vs); 1361 (s); 1258 (s); 1182 (m); 1033 (w); 919 (m sh); 773 (s sh); 704 (s); 674 (s); 616 (s); 576 (m sh)  $\text{cm}^{-1}$ .

### Preparation of $[\text{NbO}(\text{N}_3)_3]$

A sample of  $[\text{NbOF}_3]$  (133 mg; 0.80 mmol) was loaded into a Teflon-FEP ampule, followed by the addition of  $\text{SO}_2$  (1.0 mL) and  $\text{Me}_3\text{SiN}_3$  (402 mg, 3.50 mmol) *in vacuo* at  $-196^\circ\text{C}$ . The mixture was warmed to  $-20^\circ\text{C}$ . After 2 hours, a light yellow solution was obtained and all volatile materials were pumped off, first at  $-20^\circ\text{C}$  and then later at ambient temperature, leaving behind pale yellow solid  $[\text{NbO}(\text{N}_3)_3]$  (185 mg; weight expected for 0.80 mmol  $[\text{NbO}(\text{N}_3)_3]$ : 188 mg). DTA:  $104^\circ\text{C}$  (onset, explosion); impact sensitivity:  $<1\text{ J}$ , friction sensitivity:  $<5\text{ N}$ ;  $^{14}\text{N}$  NMR (acetone- $d_6$ ,  $25^\circ\text{C}$ )  $\delta = -135\text{ ppm}$  ( $\Delta\nu_{1/2} = 40\text{ Hz}$ ) ( $\text{N}_\beta$ ),  $-206\text{ ppm}$  ( $\Delta\nu_{1/2} = 60\text{ Hz}$ ) ( $\text{N}_\gamma$ ),  $-316\text{ ppm}$  ( $\Delta\nu_{1/2} = 300\text{ Hz}$ ) ( $\text{N}_\alpha$ ); Raman ( $-80^\circ\text{C}$ ,  $20\text{ mW}$ )  $\tilde{\nu} = 2136$  (8.6); 2114 (8.9); 2082 (5.4); 1364 (4.2); 945 (5.2); 788 (5.7); 638 (7.8); 448 (10.0)  $\text{cm}^{-1}$ ; IR (KBr)  $\tilde{\nu} = 2183$  (m); 2149 (d); 2037 (w); 1751 (m); 1638 (m); 1522 (vw); 1431 (w); 1400 (w); 1257 (w); 1183 (m); 1033 (w); 856 (s sh); 663 (vs); 619 (s sh)  $\text{cm}^{-1}$ .

### Preparation of $[(\text{bipy})\text{NbO}(\text{N}_3)_3]$

A solution of  $[\text{NbO}(\text{N}_3)_3]$  (117 mg; 0.50 mmol) in  $\text{CH}_3\text{CN}$  (1.0 mL) was added to a solution of 2,2'-bipyridine (78 mg; 0.50 mmol) in  $\text{CH}_3\text{CN}$  (1.5 mL). After about 15 minutes, the solution was cooled to  $-20^\circ\text{C}$  and the solvent slowly pumped off, leaving behind a crystalline yellow solid of  $[(\text{bipy})\text{NbO}(\text{N}_3)_3]$  (191 mg; weight expected for 0.50 mmol  $[(\text{bipy})\text{NbO}(\text{N}_3)_3]$ : 196 mg). DTA:  $172^\circ\text{C}$  (onset, exotherm); impact sensitivity:  $<1\text{ J}$ , friction sensitivity:  $80\text{ N}$ ;  $^{14}\text{N}$  NMR ( $\text{SO}_2$ ,  $25^\circ\text{C}$ )  $\delta = -144\text{ ppm}$  ( $\Delta\nu_{1/2} = 30\text{ Hz}$ ) ( $\text{N}_\beta$ ),  $-206\text{ ppm}$  ( $\Delta\nu_{1/2} = 50\text{ Hz}$ ) ( $\text{N}_\gamma$ ),  $-236\text{ ppm}$  ( $\Delta\nu_{1/2} = 400\text{ Hz}$ ) ( $\text{N}_\alpha$ ); Raman ( $20^\circ\text{C}$ ,  $20\text{ mW}$ )  $\tilde{\nu} = 3090$  (0.5); 3064 (0.5); 2131 (3.7); 2073 (0.5); 1669 (0.2); 1608 (1.0); 1600 (7.1); 1591 (1.9); 1573 (1.6); 1563 (2.9); 1494 (2.5); 1484 (0.6); 1448 (0.9); 1408 (0.5); 1350 (0.8); 1343 (1.3); 1313 (7.9); 1303 (0.9); 1267 (1.3); 1246 (0.3); 1237 (0.6); 1174 (0.4); 1159 (0.9); 1064 (1.2); 1047 (0.4); 1027 (6.1); 1009 (0.3); 995 (1.7); 928 (10.0); 903 (0.3); 812 (0.2); 767 (1.5); 737 (0.2); 657 (0.2); 637 (0.6); 634 (0.7); 616 (0.3); 549 (0.1); 464 (0.2); 403 (3.3); 356 (0.5); 267 (0.7); 230 (1.4); 213 (1.2); 177 (0.7); 149 (1.8); 108 (7.7); 92 (7.3)  $\text{cm}^{-1}$ ; IR (KBr)  $\tilde{\nu} = 3111$  (vw); 3071 (vw); 3061 (vw); 3036 (vw); 2126 (s); 2084 (vs); 2068 (vs); 2038 (s); 1600 (m); 1572 (vw); 1562 (w); 1543 (vw); 1528 (vw); 1509 (vw); 1496 (w); 1474 (m); 1459 (vw); 1442 (m); 1422 (vw); 1378 (m); 1348 (s); 1325 (s); 1281 (vw); 1268 (vw); 1243 (vw); 1224 (vw); 1177 (vw); 1157 (m);

1104 (w); 1063 (w); 1025 (m); 1015 (w); 921 (s); 897 (m); 767 (s); 734 (m); 700 (vw); 655 (m); 635 (w); 622 (m); 592 (w); 414 (m)  $\text{cm}^{-1}$ .

### Preparation of $\text{Cs}_2[\text{NbO}(\text{N}_3)_5]$

To a frozen solution of  $[\text{NbOF}_3]$  (83 mg; 0.50 mmol) and CsF (152 mg; 1.0 mmol) in  $\text{SO}_2$  (1.0 mL),  $\text{Me}_3\text{SiN}_3$  (288 mg, 2.50 mmol) was added *in vacuo* at  $-196^\circ\text{C}$ . The mixture was allowed to warm to ambient temperature. After about 15 minutes, the solution was cooled to  $-20^\circ\text{C}$  and the volatile materials slowly pumped off, leaving behind a crystalline yellow-orange solid of  $\text{Cs}_2[\text{NbO}(\text{N}_3)_5]$  (289 mg; weight expected for 0.50 mmol  $\text{Cs}_2[\text{NbO}(\text{N}_3)_5]$ : 292 mg). DTA:  $134^\circ\text{C}$  (onset, explosion); impact sensitivity: 2 J, friction sensitivity:  $<5\text{ N}$ ;  $^{14}\text{N}$  NMR ( $\text{SO}_2$ ,  $25^\circ\text{C}$ )  $\delta = -135\text{ ppm}$  ( $\Delta\nu_{1/2} = 50\text{ Hz}$ ) ( $\text{N}_\beta$ ),  $-223\text{ ppm}$  ( $\Delta\nu_{1/2} = 100\text{ Hz}$ ) ( $\text{N}_\gamma$ ),  $-310\text{ ppm}$  ( $\Delta\nu_{1/2} = 300\text{ Hz}$ ) ( $\text{N}_\alpha$ ); Raman ( $-70^\circ\text{C}$ , 30 mW)  $\tilde{\nu} = 2039$  (1.8); 2016 (3.1); 1379 (0.6); 1331 (0.7); 1273 (1.9); 1188 (1.2); 1077 (10.0); 1048 (0.8); 539 (0.9); 424 (1.7); 384 (0.4); 312 (4.5); 264 (9.8); 172 (2.6); 98 (7.8)  $\text{cm}^{-1}$ ; IR (KBr);  $\tilde{\nu} = 2145$  (w); 2032 (s sh); 2010 (vs); 1251 (w); 1179 (s sh); 1074 (m); 1049 (w); 962 (m); 889 (vw); 847 (vw); 754 (vw); 653 (w); 637 (m); 615 (m); 558 (w); 549 (w); 517 (w); 499 (w); 442 (w); 433 (vw sh)  $\text{cm}^{-1}$ .

### Preparation of $[\text{TPP}]_2[\text{NbO}(\text{N}_3)_5]$

A solution of  $[\text{NbO}(\text{N}_3)_3]$  (117 mg; 0.50 mmol) in  $\text{CH}_3\text{CN}$  (1.0 mL) was added to a solution of tetraphenylphosphonium azide (381 mg; 1.00 mmol) in  $\text{CH}_3\text{CN}$  (2.5 mL). After about 15 minutes, the solution was cooled to  $-20^\circ\text{C}$  and the solvent slowly pumped off, leaving behind a crystalline yellow solid of  $[\text{TPP}]_2[\text{NbO}(\text{N}_3)_5]$  (469 mg; weight expected for 0.50 mmol  $[\text{TPP}]_2[\text{NbO}(\text{N}_3)_5]$ : 478 mg). DTA:  $200^\circ\text{C}$  (onset, exotherm); impact sensitivity: 50 J, friction sensitivity:  $>360\text{ N}$ ;  $^{14}\text{N}$  NMR (acetone- $d_6$ ,  $25^\circ\text{C}$ )  $\delta = -133\text{ ppm}$  ( $\Delta\nu_{1/2} = 40\text{ Hz}$ ) ( $\text{N}_\beta$ ),  $-170\text{ ppm}$  ( $\Delta\nu_{1/2} = 80\text{ Hz}$ ) ( $\text{N}_\gamma$ ),  $-225\text{ ppm}$  ( $\Delta\nu_{1/2} = 600\text{ Hz}$ ) ( $\text{N}_\alpha$ ); Raman ( $-80^\circ\text{C}$ , 20 mW)  $\tilde{\nu} = 3174$  (0.7); 3145 (0.8); 3063 (9.9); 3027 (0.9); 3011 (0.9); 2993 (0.6); 2986 (0.5); 2964 (0.5); 2956 (0.5); 2118 (2.9); 2111 (7.8); 2080 (1.2); 2064 (0.9); 2053 (0.7); 1588 (6.6); 1577 (1.8); 1484 (0.5); 1436 (0.4); 1363 (0.9); 1353 (0.9); 1342 (1.4); 1315 (1.7); 1242 (0.4); 1187 (1.2); 1165 (1.0); 1112 (1.5); 1100 (2.8); 1075 (0.4); 1028 (4.6); 1001 (12.8); 988 (0.7); 930 (0.5); 907 (4.9); 733 (1.1); 680 (2.9); 629 (0.5); 616 (1.9); 413 (4.6); 383 (0.8); 358 (0.9); 332 (1.3); 291 (1.1); 285 (1.5); 252 (3.3); 245 (2.4); 222 (1.6); 206 (2.0); 198 (2.5); 108 (11.8); 95 (11.0); 85 (10.3)  $\text{cm}^{-1}$ ; IR (KBr)  $\tilde{\nu} = 3091$  (vw); 3062 (w); 3050 (w); 3006 (vw); 2205 (vw); 2117 (w); 2067 (s sh); 2059 (s sh); 1985 (vw); 1585 (m); 1482 (s sh); 1438 (vs); 1336 (m); 1320 (m sh); 1273 (vw); 1186 (w); 1167 (w); 1108 (vs); 1027 (w); 996 (m); 930 (vw); 909 (m); 856 (w); 754 (s); 723 (vs); 690 (vs); 628 (w); 614 (vw); 527 (vs); 459 (vw); 447 (vw); 419 (vw)  $\text{cm}^{-1}$ .

## Crystallographic Details

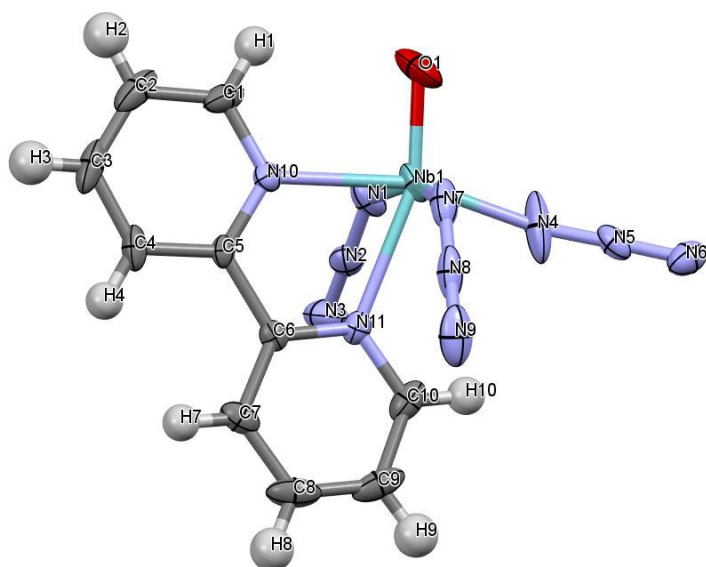

Figure S1. Asymmetric unit in the crystal structure of  $[(bipy)NbO(N_3)_3]$ .

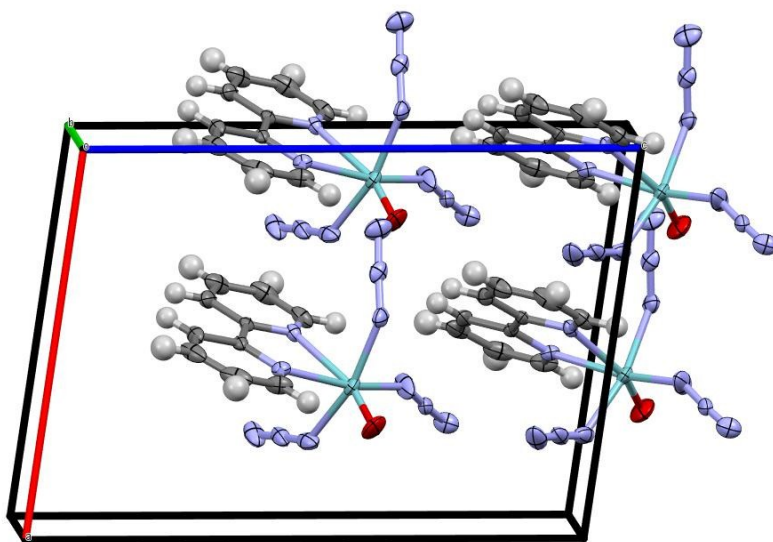

Figure S2. The unit cell in the crystal structure of  $[(bipy)NbO(N_3)_3]$ .



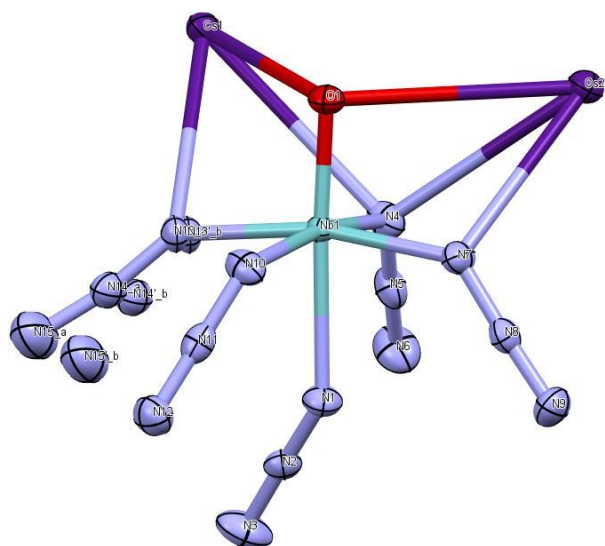

Figure S3. Asymmetric unit in the crystal structure of  $\text{Cs}_2[\text{NbO}(\text{N}_3)_5]$ .

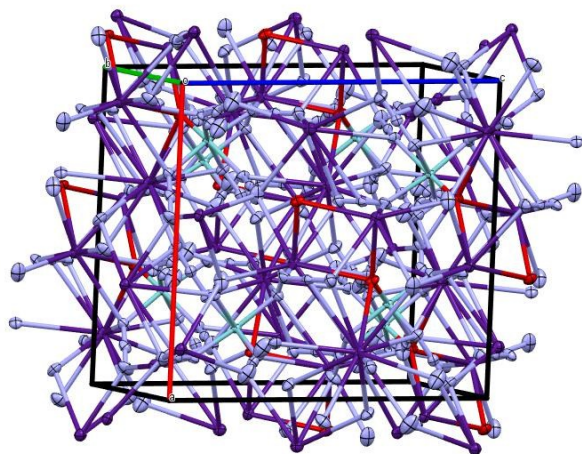

Figure S4. The unit cell in the crystal structure of  $\text{Cs}_2[\text{NbO}(\text{N}_3)_5]$ .

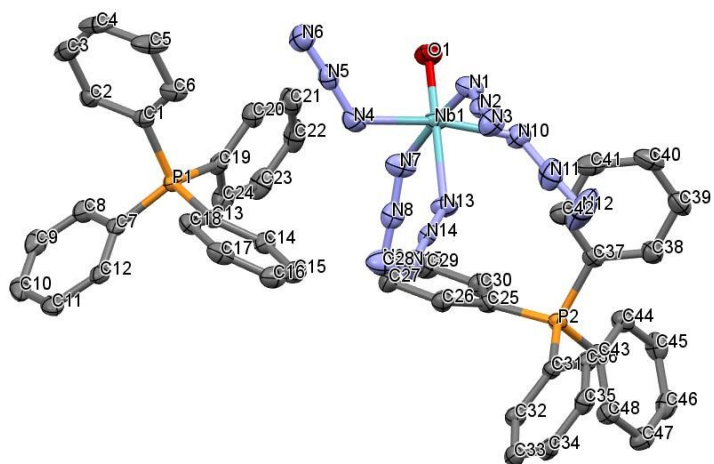

Figure S5. Asymmetric unit in the crystal structure of  $[PPh_4]_2[NbO(N_3)_5]$ .

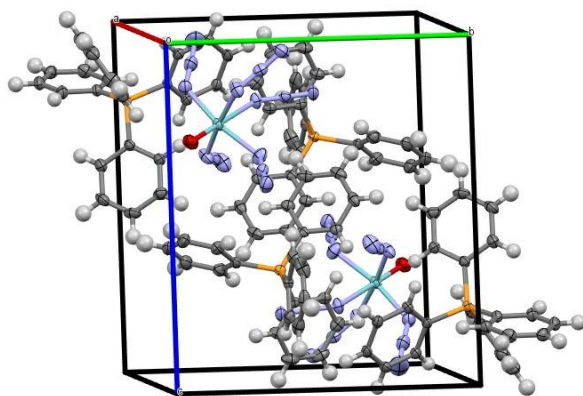

Figure S6. The unit cell in the crystal structure of  $[PPh_4]_2[NbO(N_3)_5]$ .

Table S1. Sample and crystal data for [(bipy)NbO(N<sub>3</sub>)<sub>3</sub>].

|                               |                                                    |                  |
|-------------------------------|----------------------------------------------------|------------------|
| <b>Identification code</b>    | NbON9bipy                                          |                  |
| <b>Chemical formula</b>       | C <sub>10</sub> H <sub>8</sub> N <sub>11</sub> NbO |                  |
| <b>Formula weight</b>         | 391.18 g/mol                                       |                  |
| <b>Temperature</b>            | 100(2) K                                           |                  |
| <b>Wavelength</b>             | 0.71073 Å                                          |                  |
| <b>Crystal size</b>           | 0.148 x 0.177 x 0.451 mm                           |                  |
| <b>Crystal habit</b>          | yellow prism                                       |                  |
| <b>Crystal system</b>         | monoclinic                                         |                  |
| <b>Space group</b>            | C 1 c 1                                            |                  |
| <b>Unit cell dimensions</b>   | a = 10.2393(8) Å                                   | α = 90°          |
|                               | b = 9.8720(7) Å                                    | β = 98.4600(10)° |
|                               | c = 14.4784(11) Å                                  | γ = 90°          |
| <b>Volume</b>                 | 1447.59(19) Å <sup>3</sup>                         |                  |
| <b>Z</b>                      | 4                                                  |                  |
| <b>Density (calculated)</b>   | 1.795 g/cm <sup>3</sup>                            |                  |
| <b>Absorption coefficient</b> | 0.856 mm <sup>-1</sup>                             |                  |
| <b>F(000)</b>                 | 776                                                |                  |

Table S2. Data collection and structure refinement for [(bipy)NbO(N<sub>3</sub>)<sub>3</sub>].

|                                            |                                                                                                                         |
|--------------------------------------------|-------------------------------------------------------------------------------------------------------------------------|
| <b>Diffractometer</b>                      | Bruker APEX DUO                                                                                                         |
| <b>Radiation source</b>                    | fine-focus tube, MoK $\alpha$                                                                                           |
| <b>Theta range for data collection</b>     | 2.85 to 30.55°                                                                                                          |
| <b>Index ranges</b>                        | -14 $\leq$ h $\leq$ 14, -14 $\leq$ k $\leq$ 13, -20 $\leq$ l $\leq$ 20                                                  |
| <b>Reflections collected</b>               | 13714                                                                                                                   |
| <b>Independent reflections</b>             | 4321 [R(int) = 0.0210]                                                                                                  |
| <b>Coverage of independent reflections</b> | 99.3%                                                                                                                   |
| <b>Absorption correction</b>               | multi-scan                                                                                                              |
| <b>Max. and min. transmission</b>          | 0.8840 and 0.6990                                                                                                       |
| <b>Structure solution technique</b>        | direct methods                                                                                                          |
| <b>Structure solution program</b>          | SHELXTL XT 2013/1 (Bruker AXS, 2014)                                                                                    |
| <b>Refinement method</b>                   | Full-matrix least-squares on F <sup>2</sup>                                                                             |
| <b>Refinement program</b>                  | SHELXTL XL 2014/7 (Bruker AXS, 2014)                                                                                    |
| <b>Function minimized</b>                  | $\Sigma w(F_o^2 - F_c^2)^2$                                                                                             |
| <b>Data / restraints / parameters</b>      | 4321 / 2 / 208                                                                                                          |
| <b>Goodness-of-fit on F<sup>2</sup></b>    | 1.094                                                                                                                   |
| <b>Final R indices</b>                     | 4097 data; I>2 $\sigma$ (I) R1 = 0.0233, wR2 = 0.0500<br>all data R1 = 0.0264, wR2 = 0.0518                             |
| <b>Weighting scheme</b>                    | w=1/[ $\sigma^2(F_o^2)+(0.0157P)^2+1.4433P$ ]<br>where P=(F <sub>o</sub> <sup>2</sup> +2F <sub>c</sub> <sup>2</sup> )/3 |
| <b>Absolute structure parameter</b>        | -0.0(0)                                                                                                                 |
| <b>Largest diff. peak and hole</b>         | 0.652 and -0.929 eÅ <sup>-3</sup>                                                                                       |
| <b>R.M.S. deviation from mean</b>          | 0.060 eÅ <sup>-3</sup>                                                                                                  |

Table S3. Atomic coordinates and equivalent isotropic atomic displacement parameters ( $\text{\AA}^2$ ) for [(bipy)NbO(N<sub>3</sub>)<sub>3</sub>].

U(eq) is defined as one third of the trace of the orthogonalized U<sub>ij</sub> tensor.

|     | x/a        | y/b        | z/c         | U(eq)      |
|-----|------------|------------|-------------|------------|
| C1  | 0.6076(3)  | 0.0428(3)  | 0.4148(3)   | 0.0319(7)  |
| C2  | 0.5823(3)  | 0.9684(3)  | 0.3334(3)   | 0.0413(9)  |
| C3  | 0.5231(3)  | 0.0312(4)  | 0.2526(3)   | 0.0391(9)  |
| C4  | 0.4866(3)  | 0.1659(3)  | 0.2559(2)   | 0.0283(6)  |
| C5  | 0.5124(3)  | 0.2357(3)  | 0.34061(18) | 0.0178(5)  |
| C6  | 0.4721(2)  | 0.3776(3)  | 0.35181(18) | 0.0174(5)  |
| C7  | 0.4131(3)  | 0.4572(3)  | 0.2781(2)   | 0.0273(6)  |
| C8  | 0.3819(3)  | 0.5906(4)  | 0.2955(3)   | 0.0384(8)  |
| C9  | 0.4090(4)  | 0.6413(3)  | 0.3842(3)   | 0.0390(8)  |
| C10 | 0.4657(3)  | 0.5562(3)  | 0.4553(2)   | 0.0291(6)  |
| N1  | 0.4469(3)  | 0.2276(3)  | 0.58490(18) | 0.0283(5)  |
| N2  | 0.3331(3)  | 0.2661(3)  | 0.57043(19) | 0.0273(5)  |
| N3  | 0.2248(3)  | 0.2976(3)  | 0.5599(3)   | 0.0421(7)  |
| N4  | 0.6364(4)  | 0.4405(5)  | 0.6544(2)   | 0.0581(11) |
| N5  | 0.6925(2)  | 0.5296(3)  | 0.69924(17) | 0.0255(5)  |
| N6  | 0.7410(3)  | 0.6151(3)  | 0.7438(2)   | 0.0327(6)  |
| N7  | 0.7732(3)  | 0.3923(3)  | 0.4935(2)   | 0.0361(7)  |
| N8  | 0.7679(3)  | 0.4966(4)  | 0.4467(2)   | 0.0354(7)  |
| N9  | 0.7673(3)  | 0.5922(4)  | 0.4024(2)   | 0.0462(9)  |
| N10 | 0.5752(2)  | 0.1751(2)  | 0.41873(18) | 0.0213(5)  |
| N11 | 0.4974(2)  | 0.4268(2)  | 0.43987(16) | 0.0199(4)  |
| Nb1 | 0.62665(2) | 0.29359(3) | 0.55434(2)  | 0.02723(7) |
| O1  | 0.7244(3)  | 0.1615(4)  | 0.5998(2)   | 0.0513(7)  |

Table S4. Bond lengths (Å) for [(bipy)NbO(N<sub>3</sub>)<sub>3</sub>].

|         |          |         |          |
|---------|----------|---------|----------|
| C1-N10  | 1.350(4) | C1-C2   | 1.381(5) |
| C1-H1   | 0.95     | C2-C3   | 1.383(6) |
| C2-H2   | 0.95     | C3-C4   | 1.384(5) |
| C3-H3   | 0.95     | C4-C5   | 1.397(4) |
| C4-H4   | 0.95     | C5-N10  | 1.355(4) |
| C5-C6   | 1.476(4) | C6-N11  | 1.353(3) |
| C6-C7   | 1.390(4) | C7-C8   | 1.387(5) |
| C7-H7   | 0.95     | C8-C9   | 1.368(6) |
| C8-H8   | 0.95     | C9-C10  | 1.389(5) |
| C9-H9   | 0.95     | C10-N11 | 1.345(4) |
| C10-H10 | 0.95     | N1-N2   | 1.214(4) |
| N1-Nb1  | 2.061(3) | N2-N3   | 1.139(4) |
| N4-N5   | 1.189(4) | N4-Nb1  | 2.042(3) |
| N5-N6   | 1.132(4) | N7-N8   | 1.229(5) |
| N7-Nb1  | 2.090(3) | N8-N9   | 1.141(5) |
| N10-Nb1 | 2.280(2) | N11-Nb1 | 2.362(2) |
| Nb1-O1  | 1.715(3) |         |          |

Table S5. Bond angles (°) for [(bipy)NbO(N<sub>3</sub>)<sub>3</sub>].

|             |            |            |            |
|-------------|------------|------------|------------|
| N10-C1-C2   | 122.3(3)   | N10-C1-H1  | 118.9      |
| C2-C1-H1    | 118.9      | C1-C2-C3   | 119.2(3)   |
| C1-C2-H2    | 120.4      | C3-C2-H2   | 120.4      |
| C2-C3-C4    | 119.2(3)   | C2-C3-H3   | 120.4      |
| C4-C3-H3    | 120.4      | C3-C4-C5   | 119.2(3)   |
| C3-C4-H4    | 120.4      | C5-C4-H4   | 120.4      |
| N10-C5-C4   | 121.3(3)   | N10-C5-C6  | 115.7(2)   |
| C4-C5-C6    | 123.0(3)   | N11-C6-C7  | 121.5(3)   |
| N11-C6-C5   | 115.2(2)   | C7-C6-C5   | 123.3(3)   |
| C8-C7-C6    | 118.9(3)   | C8-C7-H7   | 120.6      |
| C6-C7-H7    | 120.6      | C9-C8-C7   | 119.9(3)   |
| C9-C8-H8    | 120.1      | C7-C8-H8   | 120.1      |
| C8-C9-C10   | 118.6(3)   | C8-C9-H9   | 120.7      |
| C10-C9-H9   | 120.7      | N11-C10-C9 | 122.5(3)   |
| N11-C10-H10 | 118.8      | C9-C10-H10 | 118.8      |
| N2-N1-Nb1   | 136.7(2)   | N3-N2-N1   | 176.6(3)   |
| N5-N4-Nb1   | 151.9(3)   | N6-N5-N4   | 176.9(3)   |
| N8-N7-Nb1   | 130.3(2)   | N9-N8-N7   | 177.5(4)   |
| C1-N10-C5   | 118.8(3)   | C1-N10-Nb1 | 120.3(2)   |
| C5-N10-Nb1  | 120.90(18) | C10-N11-C6 | 118.7(3)   |
| C10-N11-Nb1 | 122.4(2)   | C6-N11-Nb1 | 118.12(18) |
| O1-Nb1-N4   | 107.66(17) | O1-Nb1-N1  | 99.60(13)  |
| N4-Nb1-N1   | 91.41(12)  | O1-Nb1-N7  | 95.81(14)  |
| N4-Nb1-N7   | 90.26(13)  | N1-Nb1-N7  | 163.20(11) |
| O1-Nb1-N10  | 89.31(12)  | N4-Nb1-N10 | 163.03(14) |
| N1-Nb1-N10  | 85.53(10)  | N7-Nb1-N10 | 88.02(10)  |
| O1-Nb1-N11  | 158.00(12) | N4-Nb1-N11 | 93.79(15)  |
| N1-Nb1-N11  | 84.30(9)   | N7-Nb1-N11 | 78.91(10)  |
| N10-Nb1-N11 | 69.31(8)   |            |            |

Table S6. Torsion angles (°) for [(bipy)NbO(N<sub>3</sub>)<sub>3</sub>].

|               |           |                |           |
|---------------|-----------|----------------|-----------|
| N10-C1-C2-C3  | 0.8(5)    | C1-C2-C3-C4    | -2.2(5)   |
| C2-C3-C4-C5   | 1.0(5)    | C3-C4-C5-N10   | 1.6(4)    |
| C3-C4-C5-C6   | -177.3(3) | N10-C5-C6-N11  | -3.1(3)   |
| C4-C5-C6-N11  | 175.9(2)  | N10-C5-C6-C7   | 176.5(3)  |
| C4-C5-C6-C7   | -4.5(4)   | N11-C6-C7-C8   | 1.2(4)    |
| C5-C6-C7-C8   | -178.4(3) | C6-C7-C8-C9    | -0.3(5)   |
| C7-C8-C9-C10  | -1.0(5)   | C8-C9-C10-N11  | 1.4(5)    |
| C2-C1-N10-C5  | 1.8(4)    | C2-C1-N10-Nb1  | -177.8(2) |
| C4-C5-N10-C1  | -3.0(4)   | C6-C5-N10-C1   | 176.0(3)  |
| C4-C5-N10-Nb1 | 176.6(2)  | C6-C5-N10-Nb1  | -4.3(3)   |
| C9-C10-N11-C6 | -0.5(4)   | C9-C10-N11-Nb1 | 169.1(2)  |
| C7-C6-N11-C10 | -0.9(4)   | C5-C6-N11-C10  | 178.8(2)  |
| C7-C6-N11-Nb1 | -170.9(2) | C5-C6-N11-Nb1  | 8.8(3)    |



Table S7. Anisotropic atomic displacement parameters ( $\text{\AA}^2$ ) for [(bipy)NbO(N<sub>3</sub>)<sub>3</sub>].

The anisotropic atomic displacement factor exponent takes the form:  $-2\pi^2[h^2 a^{*2} U_{11} + \dots + 2 h k a^* b^* U_{12}]$

|     | U <sub>11</sub> | U <sub>22</sub> | U <sub>33</sub> | U <sub>23</sub> | U <sub>13</sub> | U <sub>12</sub> |
|-----|-----------------|-----------------|-----------------|-----------------|-----------------|-----------------|
| C1  | 0.0240(14)      | 0.0175(13)      | 0.054(2)        | 0.0021(13)      | 0.0059(14)      | 0.0013(10)      |
| C2  | 0.0273(15)      | 0.0229(15)      | 0.077(3)        | -0.0164(16)     | 0.0189(17)      | -0.0054(12)     |
| C3  | 0.0281(16)      | 0.0416(18)      | 0.051(2)        | -0.0301(17)     | 0.0174(15)      | -0.0162(14)     |
| C4  | 0.0229(13)      | 0.0396(16)      | 0.0231(14)      | -0.0125(12)     | 0.0055(11)      | -0.0123(12)     |
| C5  | 0.0156(11)      | 0.0213(12)      | 0.0169(12)      | -0.0038(9)      | 0.0032(9)       | -0.0051(9)      |
| C6  | 0.0156(11)      | 0.0209(11)      | 0.0162(11)      | 0.0026(9)       | 0.0044(9)       | -0.0047(9)      |
| C7  | 0.0217(13)      | 0.0358(16)      | 0.0246(14)      | 0.0104(12)      | 0.0044(11)      | 0.0000(11)      |
| C8  | 0.0315(16)      | 0.0345(16)      | 0.053(2)        | 0.0246(16)      | 0.0175(15)      | 0.0079(13)      |
| C9  | 0.0388(18)      | 0.0196(14)      | 0.065(2)        | 0.0082(15)      | 0.0283(17)      | 0.0038(12)      |
| C10 | 0.0312(15)      | 0.0219(13)      | 0.0385(17)      | -0.0076(12)     | 0.0190(13)      | -0.0064(11)     |
| N1  | 0.0282(13)      | 0.0365(14)      | 0.0194(11)      | 0.0100(10)      | 0.0005(9)       | -0.0041(11)     |
| N2  | 0.0346(14)      | 0.0211(11)      | 0.0248(12)      | 0.0069(9)       | -0.0002(10)     | -0.0030(10)     |
| N3  | 0.0380(16)      | 0.0337(15)      | 0.0518(19)      | 0.0087(13)      | -0.0030(14)     | 0.0069(12)      |
| N4  | 0.0437(18)      | 0.101(3)        | 0.0320(17)      | -0.0381(19)     | 0.0132(14)      | -0.032(2)       |
| N5  | 0.0207(11)      | 0.0405(14)      | 0.0156(11)      | 0.0041(10)      | 0.0039(9)       | 0.0019(10)      |
| N6  | 0.0307(13)      | 0.0235(12)      | 0.0450(17)      | -0.0006(12)     | 0.0089(12)      | -0.0007(10)     |
| N7  | 0.0213(12)      | 0.0523(18)      | 0.0348(15)      | -0.0207(14)     | 0.0039(11)      | -0.0080(12)     |
| N8  | 0.0263(13)      | 0.0535(19)      | 0.0280(14)      | -0.0186(14)     | 0.0095(11)      | -0.0195(12)     |
| N9  | 0.0437(18)      | 0.062(2)        | 0.0357(16)      | -0.0132(16)     | 0.0162(14)      | -0.0335(16)     |
| N10 | 0.0168(10)      | 0.0217(11)      | 0.0247(12)      | -0.0006(9)      | 0.0007(9)       | -0.0009(8)      |
| N11 | 0.0219(11)      | 0.0199(10)      | 0.0193(11)      | -0.0020(8)      | 0.0077(8)       | -0.0040(8)      |
| Nb1 | 0.02273(10)     | 0.04216(13)     | 0.01484(9)      | -0.00124(15)    | -0.00373(7)     | -0.00247(15)    |
| O1  | 0.0402(14)      | 0.073(2)        | 0.0353(14)      | 0.0121(14)      | -0.0126(12)     | 0.0152(14)      |

Table S8. Hydrogen atomic coordinates and isotropic atomic displacement parameters ( $\text{\AA}^2$ ) for [(bipy)NbO(N<sub>3</sub>)<sub>3</sub>].

|     | <b>x/a</b> | <b>y/b</b> | <b>z/c</b> | <b>U(eq)</b> |
|-----|------------|------------|------------|--------------|
| H1  | 0.6493     | -0.0005    | 0.4700     | 0.038        |
| H2  | 0.6053     | -0.1248    | 0.3329     | 0.05         |
| H3  | 0.5076     | -0.0176    | 0.1955     | 0.047        |
| H4  | 0.4445     | 0.2104     | 0.2014     | 0.034        |
| H7  | 0.3944     | 0.4208     | 0.2168     | 0.033        |
| H8  | 0.3418     | 0.6466     | 0.2460     | 0.046        |
| H9  | 0.3894     | 0.7329     | 0.3969     | 0.047        |
| H10 | 0.4828     | 0.5906     | 0.5172     | 0.035        |

Table S9. Sample and crystal data for Cs<sub>2</sub>[NbO(N<sub>3</sub>)<sub>5</sub>].

|                               |                                     |                |
|-------------------------------|-------------------------------------|----------------|
| <b>Identification code</b>    | Cs <sub>2</sub> NbON15              |                |
| <b>Chemical formula</b>       | Cs <sub>2</sub> N <sub>15</sub> NbO |                |
| <b>Formula weight</b>         | 584.88                              |                |
| <b>Temperature</b>            | 133(2) K                            |                |
| <b>Wavelength</b>             | 0.71073 Å                           |                |
| <b>Crystal size</b>           | 0.090 x 0.150 x 0.170 mm            |                |
| <b>Crystal habit</b>          | yellow prism                        |                |
| <b>Crystal system</b>         | monoclinic                          |                |
| <b>Space group</b>            | C 1 2/c 1                           |                |
| <b>Unit cell dimensions</b>   | a = 12.5793(15) Å                   | α = 90°        |
|                               | b = 16.4373(19) Å                   | β = 92.433(2)° |
|                               | c = 12.8012(15) Å                   | γ = 90°        |
| <b>Volume</b>                 | 2644.5(5) Å <sup>3</sup>            |                |
| <b>Z</b>                      | 8                                   |                |
| <b>Density (calculated)</b>   | 2.938 g/cm <sup>3</sup>             |                |
| <b>Absorption coefficient</b> | 6.358 mm <sup>-1</sup>              |                |
| <b>F(000)</b>                 | 2112                                |                |

Table S10. Data collection and structure refinement for Cs<sub>2</sub>[NbO(N<sub>3</sub>)<sub>5</sub>].

|                                            |                                                                                                                         |
|--------------------------------------------|-------------------------------------------------------------------------------------------------------------------------|
| <b>Diffractometer</b>                      | Bruker SMART APEX                                                                                                       |
| <b>Radiation source</b>                    | fine-focus tube, MoK $\alpha$                                                                                           |
| <b>Theta range for data collection</b>     | 2.04 to 28.72 $^{\circ}$                                                                                                |
| <b>Index ranges</b>                        | -11 $\leq$ h $\leq$ 16, -21 $\leq$ k $\leq$ 21, -17 $\leq$ l $\leq$ 14                                                  |
| <b>Reflections collected</b>               | 8376                                                                                                                    |
| <b>Independent reflections</b>             | 3157 [R(int) = 0.0213]                                                                                                  |
| <b>Coverage of independent reflections</b> | 92.4%                                                                                                                   |
| <b>Absorption correction</b>               | multi-scan                                                                                                              |
| <b>Max. and min. transmission</b>          | 0.5980 and 0.4110                                                                                                       |
| <b>Structure solution technique</b>        | direct methods                                                                                                          |
| <b>Structure solution program</b>          | SHELXTL XT 2013/6 (Sheldrick, 2013)                                                                                     |
| <b>Refinement method</b>                   | Full-matrix least-squares on F <sup>2</sup>                                                                             |
| <b>Refinement program</b>                  | SHELXL-2014 (Sheldrick, 2014)                                                                                           |
| <b>Function minimized</b>                  | $\Sigma w(F_o^2 - F_c^2)^2$                                                                                             |
| <b>Data / restraints / parameters</b>      | 3157 / 39 / 182                                                                                                         |
| <b>Goodness-of-fit on F<sup>2</sup></b>    | 1.053                                                                                                                   |
| $\Delta/\sigma_{\max}$                     | 0.001                                                                                                                   |
| <b>Final R indices</b>                     | 2931 data; I>2 $\sigma$ (I) R1 = 0.0200, wR2 = 0.0442<br>all data R1 = 0.0226, wR2 = 0.0450                             |
| <b>Weighting scheme</b>                    | w=1/[ $\sigma^2(F_o^2)+(0.0169P)^2+4.2919P$ ]<br>where P=(F <sub>o</sub> <sup>2</sup> +2F <sub>c</sub> <sup>2</sup> )/3 |
| <b>Largest diff. peak and hole</b>         | 0.625 and -0.772 eÅ <sup>-3</sup>                                                                                       |
| <b>R.M.S. deviation from mean</b>          | 0.130 eÅ <sup>-3</sup>                                                                                                  |

Table S11. Atomic coordinates and equivalent isotropic atomic displacement parameters ( $\text{\AA}^2$ ) for  $\text{Cs}_2[\text{NbO}(\text{N}_3)_5]$ .

$U(\text{eq})$  is defined as one third of the trace of the orthogonalized  $U_{ij}$  tensor.

|        | <b>x/a</b>  | <b>y/b</b>  | <b>z/c</b>  | <b>U(eq)</b> |
|--------|-------------|-------------|-------------|--------------|
| Cs1    | 0.07691(2)  | 0.38598(2)  | 0.90181(2)  | 0.02238(6)   |
| Cs2    | 0.34604(2)  | 0.62577(2)  | 0.06078(2)  | 0.02510(6)   |
| N1     | 0.3140(2)   | 0.34738(15) | 0.2886(2)   | 0.0246(5)    |
| N2     | 0.3395(2)   | 0.27840(15) | 0.29288(18) | 0.0210(5)    |
| N3     | 0.3653(3)   | 0.21076(17) | 0.3000(2)   | 0.0404(8)    |
| N4     | 0.3077(2)   | 0.41863(15) | 0.0712(2)   | 0.0259(5)    |
| N5     | 0.3759(2)   | 0.36650(15) | 0.0662(2)   | 0.0262(6)    |
| N6     | 0.4409(2)   | 0.31847(17) | 0.0581(2)   | 0.0377(7)    |
| N7     | 0.3001(2)   | 0.52140(15) | 0.26627(19) | 0.0244(5)    |
| N8     | 0.3786(2)   | 0.51415(14) | 0.32361(19) | 0.0216(5)    |
| N9     | 0.4533(2)   | 0.51024(16) | 0.3769(2)   | 0.0313(6)    |
| N10    | 0.1125(2)   | 0.42707(15) | 0.3282(2)   | 0.0268(6)    |
| N11    | 0.11502(19) | 0.37121(15) | 0.3884(2)   | 0.0219(5)    |
| N12    | 0.1159(2)   | 0.31907(17) | 0.4482(2)   | 0.0311(6)    |
| N13_a  | 0.1186(10)  | 0.3279(6)   | 0.1467(11)  | 0.0205(17)   |
| N14_a  | 0.1029(5)   | 0.2628(4)   | 0.1773(5)   | 0.0261(11)   |
| N15_a  | 0.0707(6)   | 0.2024(4)   | 0.2093(5)   | 0.0530(13)   |
| N13'_b | 0.1371(12)  | 0.3276(7)   | 0.1319(14)  | 0.0205(17)   |
| N14'_b | 0.1418(6)   | 0.2597(5)   | 0.1533(6)   | 0.0261(11)   |
| N15'_b | 0.1534(7)   | 0.1911(4)   | 0.1659(6)   | 0.0530(13)   |
| Nb1    | 0.20361(2)  | 0.43388(2)  | 0.19315(2)  | 0.01592(6)   |
| O1     | 0.12599(17) | 0.50311(12) | 0.12205(17) | 0.0257(5)    |

Table S12. Bond lengths (Å) for Cs<sub>2</sub>[NbO(N<sub>3</sub>)<sub>5</sub>].

|               |           |             |           |
|---------------|-----------|-------------|-----------|
| Cs1-O1        | 3.141(2)  | Cs1-N3      | 3.145(3)  |
| Cs1-N13'_b    | 3.159(16) | Cs1-N10     | 3.251(3)  |
| Cs1-N13_a     | 3.297(13) | Cs1-N3      | 3.319(3)  |
| Cs1-N12       | 3.343(3)  | Cs1-N6      | 3.408(3)  |
| Cs1-O1        | 3.448(2)  | Cs1-N4      | 3.589(3)  |
| Cs1-N7        | 3.691(3)  | Cs1-N11     | 3.695(2)  |
| Cs2-N7        | 3.213(3)  | Cs2-N12     | 3.216(3)  |
| Cs2-N9        | 3.232(3)  | Cs2-N6      | 3.268(3)  |
| Cs2-N12       | 3.305(3)  | Cs2-N15_a   | 3.329(6)  |
| Cs2-N4        | 3.442(3)  | Cs2-N1      | 3.519(3)  |
| Cs2-O1        | 3.539(2)  | Cs2-N3      | 3.549(3)  |
| Cs2-N9        | 3.554(3)  | Cs2-N15_a   | 3.568(6)  |
| N1-N2         | 1.179(3)  | N1-Nb1      | 2.302(2)  |
| N1-Cs2        | 3.519(3)  | N2-N3       | 1.161(3)  |
| N2-Cs2        | 3.772(2)  | N3-Cs1      | 3.145(3)  |
| N3-Cs1        | 3.319(3)  | N3-Cs2      | 3.549(3)  |
| N4-N5         | 1.216(4)  | N4-Nb1      | 2.095(2)  |
| N5-N6         | 1.145(4)  | N6-Cs2      | 3.268(3)  |
| N6-Cs1        | 3.408(3)  | N7-N8       | 1.211(3)  |
| N7-Nb1        | 2.079(2)  | N7-Cs1      | 3.691(3)  |
| N8-N9         | 1.139(4)  | N8-Cs2      | 3.845(2)  |
| N9-Cs2        | 3.232(3)  | N9-Cs2      | 3.554(3)  |
| N10-N11       | 1.198(3)  | N10-Nb1     | 2.118(3)  |
| N10-Cs1       | 3.251(3)  | N11-N12     | 1.149(3)  |
| N11-Cs2       | 3.574(2)  | N11-Cs1     | 3.695(2)  |
| N12-Cs2       | 3.216(3)  | N12-Cs2     | 3.305(3)  |
| N12-Cs1       | 3.343(3)  | N13_a-N14_a | 1.159(9)  |
| N13_a-Nb1     | 2.116(12) | N14_a-N15_a | 1.155(7)  |
| N15_a-Cs2     | 3.329(6)  | N15_a-Cs2   | 3.568(6)  |
| N13'_b-N14'_b | 1.150(11) | N13'_b-Nb1  | 2.076(15) |
| N14'_b-N15'_b | 1.149(9)  | N15'_b-Cs2  | 3.660(8)  |
| N15'_b-Cs1    | 3.757(9)  | Nb1-O1      | 1.732(2)  |
| Nb1-Cs1       | 4.3364(4) | O1-Cs1      | 3.141(2)  |

Table S13. Bond angles (°) for Cs<sub>2</sub>[NbO(N<sub>3</sub>)<sub>5</sub>].

|                |           |                |            |
|----------------|-----------|----------------|------------|
| O1-Cs1-N3      | 115.38(7) | O1-Cs1-N13'_b  | 115.4(3)   |
| N3-Cs1-N13'_b  | 123.9(3)  | O1-Cs1-N10     | 62.89(6)   |
| N3-Cs1-N10     | 101.56(7) | N13'_b-Cs1-N10 | 121.8(3)   |
| O1-Cs1-N13_a   | 110.9(2)  | N3-Cs1-N13_a   | 127.0(2)   |
| N10-Cs1-N13_a  | 122.1(2)  | O1-Cs1-N3      | 66.74(7)   |
| N3-Cs1-N3      | 69.18(11) | N13'_b-Cs1-N3  | 112.2(3)   |
| N10-Cs1-N3     | 117.20(7) | N13_a-Cs1-N3   | 109.1(2)   |
| O1-Cs1-N12     | 68.92(6)  | N3-Cs1-N12     | 120.26(8)  |
| N13'_b-Cs1-N12 | 61.0(3)   | N10-Cs1-N12    | 126.12(7)  |
| N13_a-Cs1-N12  | 56.6(2)   | N3-Cs1-N12     | 58.56(7)   |
| O1-Cs1-N6      | 121.90(6) | N3-Cs1-N6      | 69.17(7)   |
| N13'_b-Cs1-N6  | 64.8(3)   | N10-Cs1-N6     | 170.58(7)  |
| N13_a-Cs1-N6   | 65.2(2)   | N3-Cs1-N6      | 61.96(7)   |
| N12-Cs1-N6     | 62.29(7)  | O1-Cs1-O1      | 82.64(5)   |
| N3-Cs1-O1      | 156.13(7) | N13'_b-Cs1-O1  | 51.7(3)    |
| N10-Cs1-O1     | 71.76(6)  | N13_a-Cs1-O1   | 50.9(2)    |
| N3-Cs1-O1      | 134.53(7) | N12-Cs1-O1     | 79.82(6)   |
| N6-Cs1-O1      | 115.97(6) | O1-Cs1-N4      | 127.23(6)  |
| N3-Cs1-N4      | 111.27(7) | N13'_b-Cs1-N4  | 47.7(3)    |
| N10-Cs1-N4     | 85.18(6)  | N13_a-Cs1-N4   | 51.5(2)    |
| N3-Cs1-N4      | 157.42(7) | N12-Cs1-N4     | 106.88(6)  |
| N6-Cs1-N4      | 96.50(7)  | O1-Cs1-N4      | 46.40(5)   |
| O1-Cs1-N7      | 110.24(5) | N3-Cs1-N7      | 67.39(7)   |
| N13'_b-Cs1-N7  | 114.0(3)  | N10-Cs1-N7     | 49.99(6)   |
| N13_a-Cs1-N7   | 118.2(2)  | N3-Cs1-N7      | 128.78(7)  |
| N12-Cs1-N7     | 172.15(6) | N6-Cs1-N7      | 122.27(6)  |
| O1-Cs1-N7      | 92.33(5)  | N4-Cs1-N7      | 67.07(5)   |
| O1-Cs1-N11     | 63.60(5)  | N3-Cs1-N11     | 138.14(7)  |
| N13'_b-Cs1-N11 | 56.0(3)   | N10-Cs1-N11    | 112.02(6)  |
| N13_a-Cs1-N11  | 51.1(2)   | N3-Cs1-N11     | 73.50(7)   |
| N12-Cs1-N11    | 17.91(6)  | N6-Cs1-N11     | 77.08(6)   |
| O1-Cs1-N11     | 62.75(5)  | N4-Cs1-N11     | 96.17(6)   |
| N7-Cs1-N11     | 154.47(6) | N7-Cs2-N12     | 126.09(6)  |
| N7-Cs2-N9      | 69.50(7)  | N12-Cs2-N9     | 118.27(7)  |
| N7-Cs2-N6      | 135.26(7) | N12-Cs2-N6     | 65.17(7)   |
| N9-Cs2-N6      | 68.44(7)  | N7-Cs2-N12     | 108.59(7)  |
| N12-Cs2-N12    | 80.92(8)  | N9-Cs2-N12     | 158.33(7)  |
| N6-Cs2-N12     | 116.13(7) | N7-Cs2-N15_a   | 62.55(13)  |
| N12-Cs2-N15_a  | 67.44(12) | N9-Cs2-N15_a   | 77.92(12)  |
| N6-Cs2-N15_a   | 94.12(15) | N12-Cs2-N15_a  | 121.24(12) |
| N7-Cs2-N4      | 53.84(6)  | N12-Cs2-N4     | 179.49(7)  |
| N9-Cs2-N4      | 61.22(7)  | N6-Cs2-N4      | 114.48(6)  |
| N12-Cs2-N4     | 99.58(7)  | N15_a-Cs2-N4   | 112.30(11) |
| N7-Cs2-N1      | 149.39(6) | N12-Cs2-N1     | 81.46(6)   |
| N9-Cs2-N1      | 111.94(7) | N6-Cs2-N1      | 64.24(7)   |
| N12-Cs2-N1     | 58.17(6)  | N15_a-Cs2-N1   | 147.84(12) |
| N4-Cs2-N1      | 98.74(6)  | N7-Cs2-O1      | 49.08(5)   |
| N12-Cs2-O1     | 133.61(6) | N9-Cs2-O1      | 102.74(6)  |

|                   |            |                      |            |
|-------------------|------------|----------------------|------------|
| N6-Cs2-O1         | 158.02(6)  | N12-Cs2-O1           | 64.79(6)   |
| N15_a-Cs2-O1      | 103.85(14) | N4-Cs2-O1            | 46.82(5)   |
| N1-Cs2-O1         | 103.49(5)  | N7-Cs2-N3            | 68.57(7)   |
| N12-Cs2-N3        | 75.22(7)   | N9-Cs2-N3            | 134.52(7)  |
| N6-Cs2-N3         | 140.33(7)  | N12-Cs2-N3           | 56.63(7)   |
| N15_a-Cs2-N3      | 67.78(14)  | N4-Cs2-N3            | 105.11(6)  |
| N1-Cs2-N3         | 113.03(7)  | O1-Cs2-N3            | 60.23(6)   |
| N7-Cs2-N9         | 107.03(6)  | N12-Cs2-N9           | 122.44(7)  |
| N9-Cs2-N9         | 58.63(8)   | N6-Cs2-N9            | 61.72(7)   |
| N12-Cs2-N9        | 103.53(6)  | N15_a-Cs2-N9         | 135.19(12) |
| N4-Cs2-N9         | 57.39(6)   | N1-Cs2-N9            | 56.87(6)   |
| O1-Cs2-N9         | 96.37(6)   | N3-Cs2-N9            | 153.34(7)  |
| N7-Cs2-N15_a      | 85.30(11)  | N12-Cs2-N15_a        | 63.56(11)  |
| N9-Cs2-N15_a      | 58.88(11)  | N6-Cs2-N15_a         | 60.17(13)  |
| N12-Cs2-N15_a     | 142.63(11) | N15_a-Cs2-N15_a      | 35.2(3)    |
| N4-Cs2-N15_a      | 115.96(11) | N1-Cs2-N15_a         | 122.56(12) |
| O1-Cs2-N15_a      | 133.80(11) | N3-Cs2-N15_a         | 100.77(13) |
| N9-Cs2-N15_a      | 105.11(13) | N2-N1-Nb1            | 140.8(2)   |
| N2-N1-Cs2         | 93.14(17)  | Nb1-N1-Cs2           | 119.28(9)  |
| N3-N2-N1          | 178.1(3)   | N3-N2-Cs2            | 109.5(2)   |
| N1-N2-Cs2         | 68.67(16)  | N2-N3-Cs1            | 119.6(2)   |
| N2-N3-Cs1         | 135.0(2)   | Cs1-N3-Cs1           | 82.58(7)   |
| N2-N3-Cs2         | 101.7(2)   | Cs1-N3-Cs2           | 114.68(9)  |
| Cs1-N3-Cs2        | 102.69(7)  | N5-N4-Nb1            | 126.0(2)   |
| N5-N4-Cs2         | 126.5(2)   | Nb1-N4-Cs2           | 90.20(8)   |
| N5-N4-Cs1         | 114.7(2)   | Nb1-N4-Cs1           | 87.32(8)   |
| Cs2-N4-Cs1        | 103.64(7)  | N6-N5-N4             | 177.5(3)   |
| N5-N6-Cs2         | 116.9(2)   | N5-N6-Cs1            | 127.9(2)   |
| Cs2-N6-Cs1        | 114.03(8)  | N8-N7-Nb1            | 130.6(2)   |
| N8-N7-Cs2         | 112.24(19) | Nb1-N7-Cs2           | 97.05(8)   |
| N8-N7-Cs1         | 111.87(18) | Nb1-N7-Cs1           | 93.20(8)   |
| Cs2-N7-Cs1        | 109.35(7)  | N9-N8-N7             | 177.5(3)   |
| N9-N8-Cs2         | 127.3(2)   | N7-N8-Cs2            | 50.79(16)  |
| N9-N8-Cs2         | 66.83(19)  | N7-N8-Cs2            | 115.22(18) |
| Cs2-N8-Cs2        | 165.26(7)  | N8-N9-Cs2            | 136.9(2)   |
| N8-N9-Cs2         | 96.0(2)    | Cs2-N9-Cs2           | 121.37(8)  |
| N11-N10-Nb1       | 124.4(2)   | N11-N10-Cs1          | 122.58(19) |
| Nb1-N10-Cs1       | 105.81(9)  | N12-N11-N10          | 177.9(3)   |
| N12-N11-Cs2       | 67.28(18)  | N10-N11-Cs2          | 112.66(19) |
| N12-N11-Cs1       | 63.44(18)  | N10-N11-Cs1          | 114.61(18) |
| Cs2-N11-Cs1       | 95.14(6)   | N11-N12-Cs2          | 135.2(2)   |
| N11-N12-Cs2       | 94.01(19)  | Cs2-N12-Cs2          | 99.08(8)   |
| N11-N12-Cs1       | 98.7(2)    | Cs2-N12-Cs1          | 117.28(8)  |
| Cs2-N12-Cs1       | 107.64(8)  | N14_a-N13_a-Nb1      | 139.1(11)  |
| N14_a-N13_a-Cs1   | 124.5(9)   | Nb1-N13_a-Cs1        | 95.0(3)    |
| N15_a-N14_a-N13_a | 169.0(9)   | N14_a-N15_a-Cs2      | 122.5(5)   |
| N14_a-N15_a-Cs2   | 113.4(5)   | Cs2-N15_a-Cs2        | 123.37(18) |
| N14'_b-N13'_b-Nb1 | 135.3(13)  | N14'_b-N13'_b-Cs1    | 121.6(12)  |
| Nb1-N13'_b-Cs1    | 100.0(4)   | N15'_b-N14'_b-N13'_b | 172.7(12)  |



|                   |            |                   |            |
|-------------------|------------|-------------------|------------|
| N14'_b-N15'_b-Cs2 | 114.7(6)   | N14'_b-N15'_b-Cs1 | 114.2(6)   |
| Cs2-N15'_b-Cs1    | 99.01(18)  | O1-Nb1-N13'_b     | 98.3(4)    |
| O1-Nb1-N7         | 95.01(10)  | N13'_b-Nb1-N7     | 166.0(4)   |
| O1-Nb1-N4         | 92.47(10)  | N13'_b-Nb1-N4     | 82.7(4)    |
| N7-Nb1-N4         | 92.70(10)  | O1-Nb1-N13_a      | 97.3(3)    |
| N7-Nb1-N13_a      | 167.0(3)   | N4-Nb1-N13_a      | 90.9(3)    |
| O1-Nb1-N10        | 98.69(10)  | N13'_b-Nb1-N10    | 92.3(4)    |
| N7-Nb1-N10        | 89.71(10)  | N4-Nb1-N10        | 168.34(10) |
| N13_a-Nb1-N10     | 84.3(3)    | O1-Nb1-N1         | 176.80(10) |
| N13'_b-Nb1-N1     | 84.6(4)    | N7-Nb1-N1         | 82.00(9)   |
| N4-Nb1-N1         | 86.53(10)  | N13_a-Nb1-N1      | 85.8(3)    |
| N10-Nb1-N1        | 82.50(9)   | O1-Nb1-Cs1        | 70.21(7)   |
| N13'_b-Nb1-Cs1    | 130.9(4)   | N7-Nb1-Cs1        | 58.20(7)   |
| N4-Nb1-Cs1        | 142.99(7)  | N13_a-Nb1-Cs1     | 122.7(3)   |
| N10-Nb1-Cs1       | 46.16(7)   | N1-Nb1-Cs1        | 108.92(6)  |
| Nb1-O1-Cs1        | 150.45(11) | Nb1-O1-Cs1        | 98.06(8)   |
| Cs1-O1-Cs1        | 97.36(5)   | Nb1-O1-Cs2        | 93.55(8)   |
| Cs1-O1-Cs2        | 106.72(6)  | Cs1-O1-Cs2        | 104.57(6)  |

Table S14. Anisotropic atomic displacement parameters ( $\text{\AA}^2$ ) for  $\text{Cs}_2[\text{NbO}(\text{N}_3)_5]$ .

The anisotropic atomic displacement factor exponent takes the form:  $-2\pi^2[ h^2 a^{*2} U_{11} + \dots + 2 h k a^* b^* U_{12} ]$

|        | $U_{11}$    | $U_{22}$    | $U_{33}$    | $U_{23}$    | $U_{13}$    | $U_{12}$    |
|--------|-------------|-------------|-------------|-------------|-------------|-------------|
| Cs1    | 0.02702(10) | 0.01916(9)  | 0.02071(10) | 0.00047(6)  | -0.00192(7) | -0.00093(7) |
| Cs2    | 0.02556(11) | 0.02148(10) | 0.02818(11) | 0.00469(7)  | 0.00021(8)  | 0.00096(7)  |
| N1     | 0.0248(13)  | 0.0201(12)  | 0.0290(14)  | 0.0018(10)  | 0.0000(10)  | 0.0063(10)  |
| N2     | 0.0230(13)  | 0.0243(13)  | 0.0155(12)  | 0.0006(9)   | -0.0015(9)  | 0.0028(10)  |
| N3     | 0.062(2)    | 0.0234(14)  | 0.0355(17)  | 0.0025(12)  | 0.0017(15)  | 0.0140(14)  |
| N4     | 0.0265(14)  | 0.0250(13)  | 0.0266(14)  | 0.0036(11)  | 0.0073(10)  | 0.0039(11)  |
| N5     | 0.0278(14)  | 0.0231(13)  | 0.0284(14)  | 0.0009(11)  | 0.0081(11)  | -0.0049(12) |
| N6     | 0.0377(17)  | 0.0303(15)  | 0.0463(18)  | -0.0024(13) | 0.0153(14)  | 0.0072(13)  |
| N7     | 0.0268(14)  | 0.0170(12)  | 0.0288(14)  | -0.0004(10) | -0.0069(11) | -0.0006(10) |
| N8     | 0.0251(13)  | 0.0167(11)  | 0.0231(13)  | -0.0009(10) | 0.0020(10)  | -0.0021(10) |
| N9     | 0.0292(15)  | 0.0314(14)  | 0.0322(15)  | -0.0020(12) | -0.0103(12) | -0.0049(12) |
| N10    | 0.0253(13)  | 0.0246(13)  | 0.0311(15)  | 0.0056(11)  | 0.0092(11)  | 0.0059(11)  |
| N11    | 0.0166(12)  | 0.0271(13)  | 0.0220(13)  | -0.0094(11) | 0.0025(10)  | -0.0001(10) |
| N12    | 0.0317(15)  | 0.0325(15)  | 0.0296(15)  | 0.0062(12)  | 0.0050(11)  | -0.0010(12) |
| N13_a  | 0.020(4)    | 0.0212(12)  | 0.021(3)    | 0.0006(14)  | 0.002(2)    | -0.0069(16) |
| N14_a  | 0.029(3)    | 0.0229(15)  | 0.026(2)    | -0.0024(16) | -0.006(2)   | -0.001(2)   |
| N15_a  | 0.068(3)    | 0.035(2)    | 0.054(2)    | 0.0048(19)  | -0.017(2)   | -0.011(2)   |
| N13'_b | 0.020(4)    | 0.0212(12)  | 0.021(3)    | 0.0006(14)  | 0.002(2)    | -0.0069(16) |
| N14'_b | 0.029(3)    | 0.0229(15)  | 0.026(2)    | -0.0024(16) | -0.006(2)   | -0.001(2)   |
| N15'_b | 0.068(3)    | 0.035(2)    | 0.054(2)    | 0.0048(19)  | -0.017(2)   | -0.011(2)   |
| Nb1    | 0.01473(12) | 0.01369(12) | 0.01917(13) | 0.00037(9)  | -0.00147(9) | 0.00117(9)  |
| O1     | 0.0230(11)  | 0.0210(10)  | 0.0325(12)  | 0.0054(9)   | -0.0056(9)  | 0.0027(9)   |

Table S15. Sample and crystal data for [PPh<sub>4</sub>]<sub>2</sub>[NbO(N<sub>3</sub>)<sub>5</sub>].

|                               |                                                                   |                  |
|-------------------------------|-------------------------------------------------------------------|------------------|
| <b>Identification code</b>    | TPP2NbON15                                                        |                  |
| <b>Chemical formula</b>       | C <sub>48</sub> H <sub>40</sub> N <sub>15</sub> NbOP <sub>2</sub> |                  |
| <b>Formula weight</b>         | 997.80                                                            |                  |
| <b>Temperature</b>            | 133(2) K                                                          |                  |
| <b>Wavelength</b>             | 0.71073 Å                                                         |                  |
| <b>Crystal size</b>           | 0.050 x 0.380 x 0.600 mm                                          |                  |
| <b>Crystal system</b>         | triclinic                                                         |                  |
| <b>Space group</b>            | P -1                                                              |                  |
| <b>Unit cell dimensions</b>   | a = 12.9621(12) Å                                                 | α = 86.124(2)°   |
|                               | b = 13.2840(12) Å                                                 | β = 85.660(2)°   |
|                               | c = 14.0506(13) Å                                                 | γ = 73.9850(10)° |
| <b>Volume</b>                 | 2316.0(4) Å <sup>3</sup>                                          |                  |
| <b>Z</b>                      | 2                                                                 |                  |
| <b>Density (calculated)</b>   | 1.431 g/cm <sup>3</sup>                                           |                  |
| <b>Absorption coefficient</b> | 0.385 mm <sup>-1</sup>                                            |                  |
| <b>F(000)</b>                 | 1024                                                              |                  |

Table S16. Data collection and structure refinement for [PPh<sub>4</sub>]<sub>2</sub>[NbO(N<sub>3</sub>)<sub>5</sub>].

|                                            |                                                                                                                 |
|--------------------------------------------|-----------------------------------------------------------------------------------------------------------------|
| <b>Diffractometer</b>                      | Bruker SMART APEX                                                                                               |
| <b>Radiation source</b>                    | fine-focus tube, MoK $\alpha$                                                                                   |
| <b>Theta range for data collection</b>     | 1.60 to 28.73 $^\circ$                                                                                          |
| <b>Index ranges</b>                        | -16 $\leq$ h $\leq$ 17, -16 $\leq$ k $\leq$ 17, -18 $\leq$ l $\leq$ 12                                          |
| <b>Reflections collected</b>               | 13718                                                                                                           |
| <b>Independent reflections</b>             | 9499 [R(int) = 0.0192]                                                                                          |
| <b>Coverage of independent reflections</b> | 79.2%                                                                                                           |
| <b>Absorption correction</b>               | multi-scan                                                                                                      |
| <b>Max. and min. transmission</b>          | 0.9810 and 0.8020                                                                                               |
| <b>Structure solution technique</b>        | direct methods                                                                                                  |
| <b>Structure solution program</b>          | SHELXTL XT 2013/6 (Sheldrick, 2013)                                                                             |
| <b>Refinement method</b>                   | Full-matrix least-squares on F <sup>2</sup>                                                                     |
| <b>Refinement program</b>                  | SHELXTL XLMP 2014/1 (Bruker AXS, 2013)                                                                          |
| <b>Function minimized</b>                  | $\Sigma w(F_o^2 - F_c^2)^2$                                                                                     |
| <b>Data / restraints / parameters</b>      | 9499 / 0 / 604                                                                                                  |
| <b>Goodness-of-fit on F<sup>2</sup></b>    | 1.054                                                                                                           |
| $\Delta/\sigma_{\max}$                     | 0.001                                                                                                           |
| <b>Final R indices</b>                     | 7512 data; I>2 $\sigma$ (I) R1 = 0.0361, wR2 = 0.0887<br>all data R1 = 0.0503, wR2 = 0.0929                     |
| <b>Weighting scheme</b>                    | w=1/[ $\sigma^2(F_o^2)+(0.0491P)^2$ ]<br>where P=(F <sub>o</sub> <sup>2</sup> +2F <sub>c</sub> <sup>2</sup> )/3 |
| <b>Largest diff. peak and hole</b>         | 0.585 and -0.363 eÅ <sup>-3</sup>                                                                               |
| <b>R.M.S. deviation from mean</b>          | 0.062 eÅ <sup>-3</sup>                                                                                          |

Table S17. Atomic coordinates and equivalent isotropic atomic displacement parameters ( $\text{\AA}^2$ ) for  $[\text{PPh}_4]_2[\text{NbO}(\text{N}_3)_5]$ .

$U(\text{eq})$  is defined as one third of the trace of the orthogonalized  $U_{ij}$  tensor.

|     | x/a         | y/b         | z/c         | U(eq)       |
|-----|-------------|-------------|-------------|-------------|
| Nb1 | 0.32283(2)  | 0.21944(2)  | 0.25635(2)  | 0.02543(7)  |
| P1  | 0.29071(4)  | 0.40133(4)  | 0.67499(4)  | 0.02065(13) |
| P2  | 0.93202(4)  | 0.02303(4)  | 0.22139(4)  | 0.02083(13) |
| O1  | 0.27334(14) | 0.11767(13) | 0.30136(12) | 0.0398(4)   |
| N1  | 0.20893(16) | 0.26532(15) | 0.15173(15) | 0.0341(5)   |
| N2  | 0.18388(15) | 0.34008(15) | 0.09626(14) | 0.0292(4)   |
| N3  | 0.15487(17) | 0.40773(17) | 0.04171(16) | 0.0419(5)   |
| N4  | 0.21692(18) | 0.33454(17) | 0.34351(16) | 0.0410(5)   |
| N5  | 0.13146(17) | 0.32705(14) | 0.37867(14) | 0.0314(5)   |
| N6  | 0.04936(18) | 0.32511(17) | 0.41297(17) | 0.0441(6)   |
| N7  | 0.44103(17) | 0.19571(16) | 0.35456(15) | 0.0388(5)   |
| N8  | 0.51084(16) | 0.23658(15) | 0.36654(14) | 0.0306(5)   |
| N9  | 0.57759(18) | 0.27228(18) | 0.38258(18) | 0.0488(6)   |
| N10 | 0.43376(16) | 0.13311(15) | 0.15523(15) | 0.0365(5)   |
| N11 | 0.48786(19) | 0.16352(17) | 0.09260(17) | 0.0460(6)   |
| N12 | 0.5397(3)   | 0.1886(2)   | 0.0319(2)   | 0.0917(11)  |
| N13 | 0.38382(15) | 0.35567(14) | 0.19671(14) | 0.0314(5)   |
| N14 | 0.36147(14) | 0.44852(14) | 0.18697(12) | 0.0249(4)   |
| N15 | 0.34266(17) | 0.53829(15) | 0.17576(15) | 0.0411(5)   |
| C1  | 0.15210(16) | 0.40382(15) | 0.70220(16) | 0.0223(5)   |
| C2  | 0.11247(18) | 0.39771(16) | 0.79712(17) | 0.0282(5)   |
| C3  | 0.0040(2)   | 0.40642(18) | 0.8161(2)   | 0.0398(6)   |
| C4  | 0.93657(19) | 0.41949(18) | 0.7423(2)   | 0.0446(7)   |
| C5  | 0.9760(2)   | 0.4218(2)   | 0.6492(2)   | 0.0443(7)   |
| C6  | 0.08434(19) | 0.41360(18) | 0.62788(18) | 0.0323(6)   |
| C7  | 0.34000(16) | 0.45273(17) | 0.77115(15) | 0.0223(5)   |
| C8  | 0.35917(18) | 0.39545(19) | 0.85813(16) | 0.0300(5)   |
| C9  | 0.38541(18) | 0.4409(2)   | 0.93534(17) | 0.0364(6)   |
| C10 | 0.39321(18) | 0.5427(2)   | 0.92604(18) | 0.0353(6)   |
| C11 | 0.37754(17) | 0.59885(19) | 0.83985(17) | 0.0303(5)   |
| C12 | 0.35023(16) | 0.55446(17) | 0.76246(16) | 0.0248(5)   |
| C13 | 0.29659(17) | 0.48183(16) | 0.56812(15) | 0.0226(5)   |
| C14 | 0.37776(18) | 0.44908(18) | 0.49795(16) | 0.0280(5)   |
| C15 | 0.38243(19) | 0.5123(2)   | 0.41611(17) | 0.0348(6)   |
| C16 | 0.3074(2)   | 0.6076(2)   | 0.40498(17) | 0.0349(6)   |
| C17 | 0.22676(19) | 0.64074(18) | 0.47495(17) | 0.0320(5)   |
| C18 | 0.21985(18) | 0.57849(17) | 0.55707(16) | 0.0271(5)   |
| C19 | 0.36950(17) | 0.26970(16) | 0.65497(15) | 0.0249(5)   |
| C20 | 0.3255(2)   | 0.20394(18) | 0.60902(17) | 0.0326(5)   |
| C21 | 0.3871(2)   | 0.10364(19) | 0.58955(18) | 0.0408(6)   |
| C22 | 0.4918(2)   | 0.0692(2)   | 0.61647(18) | 0.0432(7)   |
| C23 | 0.5354(2)   | 0.1347(2)   | 0.66205(18) | 0.0401(6)   |
| C24 | 0.47531(18) | 0.23559(19) | 0.68130(17) | 0.0335(6)   |
| C25 | 0.89359(17) | 0.02195(16) | 0.34659(15) | 0.0237(5)   |
| C26 | 0.81393(18) | 0.10527(17) | 0.38416(16) | 0.0270(5)   |

|     | <b>x/a</b>  | <b>y/b</b>  | <b>z/c</b>  | <b>U(eq)</b> |
|-----|-------------|-------------|-------------|--------------|
| C27 | 0.77680(19) | 0.09918(19) | 0.47963(16) | 0.0326(5)    |
| C28 | 0.8200(2)   | 0.0109(2)   | 0.53591(17) | 0.0360(6)    |
| C29 | 0.8988(2)   | 0.92801(19) | 0.49954(17) | 0.0373(6)    |
| C30 | 0.93600(19) | 0.93256(18) | 0.40493(17) | 0.0312(5)    |
| C31 | 0.91456(16) | 0.15540(16) | 0.17574(15) | 0.0214(5)    |
| C32 | 0.95393(17) | 0.22407(16) | 0.22460(16) | 0.0245(5)    |
| C33 | 0.94766(17) | 0.32373(16) | 0.18545(16) | 0.0268(5)    |
| C34 | 0.90303(18) | 0.35563(17) | 0.09910(16) | 0.0284(5)    |
| C35 | 0.86261(18) | 0.28843(17) | 0.05062(16) | 0.0294(5)    |
| C36 | 0.86777(17) | 0.18839(17) | 0.08823(15) | 0.0247(5)    |
| C37 | 0.84803(17) | 0.96326(16) | 0.16161(15) | 0.0237(5)    |
| C38 | 0.8880(2)   | 0.90649(18) | 0.08096(17) | 0.0330(5)    |
| C39 | 0.8227(2)   | 0.8623(2)   | 0.03447(18) | 0.0393(6)    |
| C40 | 0.7171(2)   | 0.8760(2)   | 0.06644(19) | 0.0420(7)    |
| C41 | 0.6757(2)   | 0.9343(2)   | 0.14579(19) | 0.0407(6)    |
| C42 | 0.74109(19) | 0.97713(18) | 0.19391(18) | 0.0330(6)    |
| C43 | 0.06948(17) | 0.95000(16) | 0.19910(15) | 0.0239(5)    |
| C44 | 0.09661(18) | 0.84003(17) | 0.20317(16) | 0.0296(5)    |
| C45 | 0.20235(19) | 0.78334(18) | 0.18266(17) | 0.0332(6)    |
| C46 | 0.27996(19) | 0.83569(19) | 0.15781(17) | 0.0348(6)    |
| C47 | 0.25474(19) | 0.94331(19) | 0.15559(17) | 0.0343(6)    |
| C48 | 0.14911(17) | 0.00096(18) | 0.17640(16) | 0.0280(5)    |

Table S18. Bond lengths (Å) for [PPh<sub>4</sub>]<sub>2</sub>[NbO(N<sub>3</sub>)<sub>5</sub>].

|         |            |         |            |
|---------|------------|---------|------------|
| Nb1-O1  | 1.7147(15) | Nb1-N7  | 2.085(2)   |
| Nb1-N10 | 2.098(2)   | Nb1-N1  | 2.1030(19) |
| Nb1-N4  | 2.136(2)   | Nb1-N13 | 2.2553(18) |
| P1-C7   | 1.788(2)   | P1-C13  | 1.793(2)   |
| P1-C19  | 1.794(2)   | P1-C1   | 1.800(2)   |
| P2-C31  | 1.790(2)   | P2-C25  | 1.792(2)   |
| P2-C43  | 1.794(2)   | P2-C37  | 1.796(2)   |
| N1-N2   | 1.206(3)   | N2-N3   | 1.140(3)   |
| N4-N5   | 1.205(3)   | N5-N6   | 1.141(3)   |
| N7-N8   | 1.204(3)   | N8-N9   | 1.138(3)   |
| N10-N11 | 1.202(3)   | N11-N12 | 1.135(3)   |
| N13-N14 | 1.187(2)   | N14-N15 | 1.152(2)   |
| C1-C6   | 1.392(3)   | C1-C2   | 1.398(3)   |
| C2-C3   | 1.385(3)   | C2-H2   | 0.95       |
| C3-C4   | 1.379(4)   | C3-H3   | 0.95       |
| C4-C5   | 1.368(4)   | C4-H4   | 0.95       |
| C5-C6   | 1.390(3)   | C5-H5   | 0.95       |
| C6-H6   | 0.95       | C7-C12  | 1.390(3)   |
| C7-C8   | 1.396(3)   | C8-C9   | 1.384(3)   |
| C8-H8   | 0.95       | C9-C10  | 1.380(4)   |
| C9-H9   | 0.95       | C10-C11 | 1.377(3)   |
| C10-H10 | 0.95       | C11-C12 | 1.384(3)   |
| C11-H11 | 0.95       | C12-H12 | 0.95       |
| C13-C14 | 1.384(3)   | C13-C18 | 1.398(3)   |
| C14-C15 | 1.385(3)   | C14-H14 | 0.95       |
| C15-C16 | 1.375(3)   | C15-H15 | 0.95       |
| C16-C17 | 1.379(3)   | C16-H16 | 0.95       |
| C17-C18 | 1.386(3)   | C17-H17 | 0.95       |
| C18-H18 | 0.95       | C19-C20 | 1.383(3)   |
| C19-C24 | 1.391(3)   | C20-C21 | 1.385(3)   |
| C20-H20 | 0.95       | C21-C22 | 1.380(4)   |
| C21-H21 | 0.95       | C22-C23 | 1.375(4)   |
| C22-H22 | 0.95       | C23-C24 | 1.384(3)   |
| C23-H23 | 0.95       | C24-H24 | 0.95       |
| C25-C26 | 1.391(3)   | C25-C30 | 1.400(3)   |
| C26-C27 | 1.395(3)   | C26-H26 | 0.95       |
| C27-C28 | 1.376(3)   | C27-H27 | 0.95       |
| C28-C29 | 1.376(4)   | C28-H28 | 0.95       |
| C29-C30 | 1.383(3)   | C29-H29 | 0.95       |
| C30-H30 | 0.95       | C31-C32 | 1.400(3)   |
| C31-C36 | 1.402(3)   | C32-C33 | 1.382(3)   |
| C32-H32 | 0.95       | C33-C34 | 1.374(3)   |
| C33-H33 | 0.95       | C34-C35 | 1.389(3)   |
| C34-H34 | 0.95       | C35-C36 | 1.383(3)   |
| C35-H35 | 0.95       | C36-H36 | 0.95       |
| C37-C38 | 1.390(3)   | C37-C42 | 1.392(3)   |
| C38-C39 | 1.377(3)   | C38-H38 | 0.95       |
| C39-C40 | 1.374(4)   | C39-H39 | 0.95       |

|         |          |         |          |
|---------|----------|---------|----------|
| C40-C41 | 1.388(4) | C40-H40 | 0.95     |
| C41-C42 | 1.380(3) | C41-H41 | 0.95     |
| C42-H42 | 0.95     | C43-C48 | 1.390(3) |
| C43-C44 | 1.403(3) | C44-C45 | 1.389(3) |
| C44-H44 | 0.95     | C45-C46 | 1.385(3) |
| C45-H45 | 0.95     | C46-C47 | 1.374(3) |
| C46-H46 | 0.95     | C47-C48 | 1.392(3) |
| C47-H47 | 0.95     | C48-H48 | 0.95     |



Table S19. Bond angles (°) for [PPh<sub>4</sub>]<sub>2</sub>[NbO(N<sub>3</sub>)<sub>5</sub>].

|             |            |             |            |
|-------------|------------|-------------|------------|
| O1-Nb1-N7   | 95.34(8)   | O1-Nb1-N10  | 96.15(8)   |
| N7-Nb1-N10  | 91.27(9)   | O1-Nb1-N1   | 93.22(8)   |
| N7-Nb1-N1   | 171.24(7)  | N10-Nb1-N1  | 89.61(8)   |
| O1-Nb1-N4   | 95.36(8)   | N7-Nb1-N4   | 90.19(9)   |
| N10-Nb1-N4  | 168.21(8)  | N1-Nb1-N4   | 87.20(8)   |
| O1-Nb1-N13  | 178.62(8)  | N7-Nb1-N13  | 85.70(7)   |
| N10-Nb1-N13 | 84.73(7)   | N1-Nb1-N13  | 85.71(7)   |
| N4-Nb1-N13  | 83.72(8)   | C7-P1-C13   | 109.76(10) |
| C7-P1-C19   | 110.43(10) | C13-P1-C19  | 109.35(10) |
| C7-P1-C1    | 109.72(10) | C13-P1-C1   | 107.57(10) |
| C19-P1-C1   | 109.96(10) | C31-P2-C25  | 109.64(10) |
| C31-P2-C43  | 109.27(10) | C25-P2-C43  | 111.24(10) |
| C31-P2-C37  | 109.78(10) | C25-P2-C37  | 108.42(10) |
| C43-P2-C37  | 108.47(10) | N2-N1-Nb1   | 134.05(16) |
| N3-N2-N1    | 175.2(2)   | N5-N4-Nb1   | 123.82(16) |
| N6-N5-N4    | 176.6(2)   | N8-N7-Nb1   | 134.53(16) |
| N9-N8-N7    | 176.2(2)   | N11-N10-Nb1 | 129.15(17) |
| N12-N11-N10 | 177.4(3)   | N14-N13-Nb1 | 143.97(16) |
| N15-N14-N13 | 177.9(2)   | C6-C1-C2    | 120.3(2)   |
| C6-C1-P1    | 119.37(17) | C2-C1-P1    | 120.32(17) |
| C3-C2-C1    | 119.1(2)   | C3-C2-H2    | 120.5      |
| C1-C2-H2    | 120.5      | C4-C3-C2    | 120.3(2)   |
| C4-C3-H3    | 119.8      | C2-C3-H3    | 119.8      |
| C5-C4-C3    | 120.6(2)   | C5-C4-H4    | 119.7      |
| C3-C4-H4    | 119.7      | C4-C5-C6    | 120.4(2)   |
| C4-C5-H5    | 119.8      | C6-C5-H5    | 119.8      |
| C5-C6-C1    | 119.2(2)   | C5-C6-H6    | 120.4      |
| C1-C6-H6    | 120.4      | C12-C7-C8   | 119.4(2)   |
| C12-C7-P1   | 119.69(16) | C8-C7-P1    | 120.70(17) |
| C9-C8-C7    | 120.0(2)   | C9-C8-H8    | 120.0      |
| C7-C8-H8    | 120.0      | C10-C9-C8   | 119.9(2)   |
| C10-C9-H9   | 120.1      | C8-C9-H9    | 120.1      |
| C11-C10-C9  | 120.6(2)   | C11-C10-H10 | 119.7      |
| C9-C10-H10  | 119.7      | C10-C11-C12 | 119.9(2)   |
| C10-C11-H11 | 120.0      | C12-C11-H11 | 120.0      |
| C11-C12-C7  | 120.2(2)   | C11-C12-H12 | 119.9      |
| C7-C12-H12  | 119.9      | C14-C13-C18 | 120.4(2)   |
| C14-C13-P1  | 120.09(16) | C18-C13-P1  | 119.50(17) |
| C13-C14-C15 | 119.7(2)   | C13-C14-H14 | 120.1      |
| C15-C14-H14 | 120.1      | C16-C15-C14 | 120.2(2)   |
| C16-C15-H15 | 119.9      | C14-C15-H15 | 119.9      |
| C15-C16-C17 | 120.3(2)   | C15-C16-H16 | 119.9      |
| C17-C16-H16 | 119.9      | C16-C17-C18 | 120.6(2)   |
| C16-C17-H17 | 119.7      | C18-C17-H17 | 119.7      |
| C17-C18-C13 | 118.8(2)   | C17-C18-H18 | 120.6      |
| C13-C18-H18 | 120.6      | C20-C19-C24 | 120.3(2)   |
| C20-C19-P1  | 119.22(17) | C24-C19-P1  | 120.44(18) |
| C19-C20-C21 | 119.7(2)   | C19-C20-H20 | 120.1      |

|             |            |             |            |
|-------------|------------|-------------|------------|
| C21-C20-H20 | 120.1      | C22-C21-C20 | 120.2(2)   |
| C22-C21-H21 | 119.9      | C20-C21-H21 | 119.9      |
| C23-C22-C21 | 120.0(2)   | C23-C22-H22 | 120.0      |
| C21-C22-H22 | 120.0      | C22-C23-C24 | 120.6(2)   |
| C22-C23-H23 | 119.7      | C24-C23-H23 | 119.7      |
| C23-C24-C19 | 119.2(2)   | C23-C24-H24 | 120.4      |
| C19-C24-H24 | 120.4      | C26-C25-C30 | 119.7(2)   |
| C26-C25-P2  | 120.17(16) | C30-C25-P2  | 119.79(17) |
| C25-C26-C27 | 119.8(2)   | C25-C26-H26 | 120.1      |
| C27-C26-H26 | 120.1      | C28-C27-C26 | 119.5(2)   |
| C28-C27-H27 | 120.2      | C26-C27-H27 | 120.2      |
| C29-C28-C27 | 121.2(2)   | C29-C28-H28 | 119.4      |
| C27-C28-H28 | 119.4      | C28-C29-C30 | 120.0(2)   |
| C28-C29-H29 | 120.0      | C30-C29-H29 | 120.0      |
| C29-C30-C25 | 119.7(2)   | C29-C30-H30 | 120.1      |
| C25-C30-H30 | 120.1      | C32-C31-C36 | 119.94(19) |
| C32-C31-P2  | 119.79(16) | C36-C31-P2  | 120.14(16) |
| C33-C32-C31 | 119.6(2)   | C33-C32-H32 | 120.2      |
| C31-C32-H32 | 120.2      | C34-C33-C32 | 120.4(2)   |
| C34-C33-H33 | 119.8      | C32-C33-H33 | 119.8      |
| C33-C34-C35 | 120.3(2)   | C33-C34-H34 | 119.8      |
| C35-C34-H34 | 119.8      | C36-C35-C34 | 120.4(2)   |
| C36-C35-H35 | 119.8      | C34-C35-H35 | 119.8      |
| C35-C36-C31 | 119.2(2)   | C35-C36-H36 | 120.4      |
| C31-C36-H36 | 120.4      | C38-C37-C42 | 119.6(2)   |
| C38-C37-P2  | 120.42(18) | C42-C37-P2  | 119.89(17) |
| C39-C38-C37 | 120.2(2)   | C39-C38-H38 | 119.9      |
| C37-C38-H38 | 119.9      | C40-C39-C38 | 120.1(2)   |
| C40-C39-H39 | 119.9      | C38-C39-H39 | 119.9      |
| C39-C40-C41 | 120.2(2)   | C39-C40-H40 | 119.9      |
| C41-C40-H40 | 119.9      | C42-C41-C40 | 120.0(3)   |
| C42-C41-H41 | 120.0      | C40-C41-H41 | 120.0      |
| C41-C42-C37 | 119.8(2)   | C41-C42-H42 | 120.1      |
| C37-C42-H42 | 120.1      | C48-C43-C44 | 119.6(2)   |
| C48-C43-P2  | 120.84(16) | C44-C43-P2  | 119.53(17) |
| C45-C44-C43 | 119.7(2)   | C45-C44-H44 | 120.2      |
| C43-C44-H44 | 120.2      | C46-C45-C44 | 119.8(2)   |
| C46-C45-H45 | 120.1      | C44-C45-H45 | 120.1      |
| C47-C46-C45 | 121.0(2)   | C47-C46-H46 | 119.5      |
| C45-C46-H46 | 119.5      | C46-C47-C48 | 119.7(2)   |
| C46-C47-H47 | 120.2      | C48-C47-H47 | 120.2      |
| C43-C48-C47 | 120.2(2)   | C43-C48-H48 | 119.9      |
| C47-C48-H48 | 119.9      |             |            |

Table S20. Anisotropic atomic displacement parameters ( $\text{\AA}^2$ ) for  $[\text{PPh}_4]_2[\text{NbO}(\text{N}_3)_5]$ .

The anisotropic atomic displacement factor exponent takes the form:  $-2\pi^2[h^2 a^{*2} U_{11} + \dots + 2 h k a^* b^* U_{12}]$

|     | $U_{11}$    | $U_{22}$    | $U_{33}$    | $U_{23}$    | $U_{13}$    | $U_{12}$    |
|-----|-------------|-------------|-------------|-------------|-------------|-------------|
| Nb1 | 0.02905(12) | 0.02087(11) | 0.02772(13) | 0.00334(8)  | -0.00275(8) | -0.00985(8) |
| P1  | 0.0206(3)   | 0.0218(3)   | 0.0198(3)   | -0.0001(2)  | -0.0018(2)  | -0.0062(2)  |
| P2  | 0.0247(3)   | 0.0160(3)   | 0.0214(3)   | 0.0001(2)   | 0.0004(2)   | -0.0056(2)  |
| O1  | 0.0535(11)  | 0.0360(10)  | 0.0372(10)  | 0.0053(8)   | -0.0003(8)  | -0.0264(8)  |
| N1  | 0.0353(12)  | 0.0297(11)  | 0.0406(13)  | 0.0022(9)   | -0.0119(9)  | -0.0128(9)  |
| N2  | 0.0249(10)  | 0.0362(12)  | 0.0281(11)  | -0.0064(9)  | 0.0001(8)   | -0.0102(9)  |
| N3  | 0.0429(13)  | 0.0427(13)  | 0.0365(13)  | 0.0083(10)  | -0.0024(10) | -0.0081(10) |
| N4  | 0.0416(13)  | 0.0360(12)  | 0.0489(14)  | -0.0126(10) | 0.0038(11)  | -0.0158(10) |
| N5  | 0.0395(13)  | 0.0243(10)  | 0.0288(11)  | -0.0045(8)  | -0.0022(10) | -0.0051(9)  |
| N6  | 0.0416(13)  | 0.0341(12)  | 0.0534(15)  | -0.0058(10) | 0.0092(11)  | -0.0071(10) |
| N7  | 0.0469(13)  | 0.0347(12)  | 0.0391(13)  | 0.0128(10)  | -0.0174(10) | -0.0177(10) |
| N8  | 0.0313(11)  | 0.0256(10)  | 0.0283(11)  | 0.0061(8)   | -0.0029(9)  | 0.0016(9)   |
| N9  | 0.0384(13)  | 0.0499(14)  | 0.0612(16)  | 0.0105(12)  | -0.0147(12) | -0.0171(11) |
| N10 | 0.0354(12)  | 0.0299(11)  | 0.0415(13)  | 0.0002(9)   | 0.0052(10)  | -0.0068(9)  |
| N11 | 0.0491(14)  | 0.0341(12)  | 0.0459(15)  | -0.0040(11) | 0.0074(12)  | 0.0015(10)  |
| N12 | 0.113(3)    | 0.068(2)    | 0.078(2)    | 0.0031(17)  | 0.059(2)    | -0.0167(18) |
| N13 | 0.0313(11)  | 0.0221(10)  | 0.0419(12)  | 0.0040(9)   | -0.0025(9)  | -0.0101(8)  |
| N14 | 0.0245(10)  | 0.0282(11)  | 0.0203(10)  | 0.0008(8)   | 0.0037(7)   | -0.0064(8)  |
| N15 | 0.0514(14)  | 0.0211(11)  | 0.0426(13)  | 0.0012(9)   | 0.0135(10)  | -0.0010(9)  |
| C1  | 0.0202(11)  | 0.0163(10)  | 0.0302(12)  | -0.0013(9)  | -0.0021(9)  | -0.0042(8)  |
| C2  | 0.0290(12)  | 0.0217(11)  | 0.0348(14)  | -0.0046(10) | 0.0038(10)  | -0.0094(9)  |
| C3  | 0.0355(14)  | 0.0264(13)  | 0.0578(18)  | -0.0061(12) | 0.0176(13)  | -0.0132(11) |
| C4  | 0.0190(12)  | 0.0246(13)  | 0.090(2)    | 0.0056(13)  | 0.0026(14)  | -0.0090(10) |
| C5  | 0.0316(14)  | 0.0368(15)  | 0.070(2)    | 0.0147(14)  | -0.0204(14) | -0.0180(12) |
| C6  | 0.0335(13)  | 0.0313(13)  | 0.0364(14)  | 0.0057(11)  | -0.0105(11) | -0.0154(10) |
| C7  | 0.0185(10)  | 0.0309(12)  | 0.0191(11)  | -0.0030(9)  | -0.0012(8)  | -0.0090(9)  |
| C8  | 0.0293(12)  | 0.0366(13)  | 0.0254(13)  | 0.0027(10)  | -0.0042(10) | -0.0117(10) |
| C9  | 0.0283(13)  | 0.0577(17)  | 0.0230(13)  | 0.0027(12)  | -0.0053(10) | -0.0113(12) |
| C10 | 0.0222(12)  | 0.0556(17)  | 0.0305(14)  | -0.0151(12) | -0.0028(10) | -0.0111(11) |
| C11 | 0.0203(11)  | 0.0356(13)  | 0.0372(14)  | -0.0097(11) | -0.0009(10) | -0.0094(10) |
| C12 | 0.0186(11)  | 0.0319(12)  | 0.0248(12)  | -0.0012(10) | 0.0008(9)   | -0.0089(9)  |
| C13 | 0.0268(11)  | 0.0244(11)  | 0.0202(11)  | -0.0001(9)  | -0.0063(9)  | -0.0119(9)  |
| C14 | 0.0272(12)  | 0.0323(12)  | 0.0256(12)  | 0.0002(10)  | -0.0026(9)  | -0.0098(10) |
| C15 | 0.0330(13)  | 0.0502(16)  | 0.0249(13)  | 0.0011(11)  | -0.0005(10) | -0.0187(12) |
| C16 | 0.0409(14)  | 0.0437(15)  | 0.0266(13)  | 0.0104(11)  | -0.0114(11) | -0.0227(12) |
| C17 | 0.0379(14)  | 0.0253(12)  | 0.0360(14)  | 0.0057(10)  | -0.0162(11) | -0.0120(10) |
| C18 | 0.0286(12)  | 0.0265(12)  | 0.0273(13)  | -0.0019(10) | -0.0063(10) | -0.0078(9)  |
| C19 | 0.0260(12)  | 0.0224(11)  | 0.0229(12)  | 0.0024(9)   | 0.0035(9)   | -0.0029(9)  |
| C20 | 0.0350(13)  | 0.0318(13)  | 0.0299(13)  | -0.0053(10) | 0.0005(10)  | -0.0070(10) |
| C21 | 0.0597(18)  | 0.0284(13)  | 0.0340(15)  | -0.0086(11) | 0.0045(12)  | -0.0120(12) |
| C22 | 0.0614(19)  | 0.0240(13)  | 0.0330(15)  | 0.0003(11)  | 0.0101(13)  | 0.0032(12)  |
| C23 | 0.0329(14)  | 0.0388(15)  | 0.0367(15)  | 0.0054(12)  | 0.0037(11)  | 0.0069(11)  |
| C24 | 0.0303(13)  | 0.0375(14)  | 0.0294(13)  | -0.0002(11) | 0.0006(10)  | -0.0049(11) |
| C25 | 0.0294(12)  | 0.0211(11)  | 0.0218(12)  | 0.0023(9)   | -0.0020(9)  | -0.0097(9)  |

|     | $U_{11}$   | $U_{22}$   | $U_{33}$   | $U_{23}$    | $U_{13}$    | $U_{12}$    |
|-----|------------|------------|------------|-------------|-------------|-------------|
| C26 | 0.0331(13) | 0.0227(11) | 0.0253(12) | 0.0000(9)   | 0.0010(10)  | -0.0085(10) |
| C27 | 0.0374(14) | 0.0357(14) | 0.0267(13) | -0.0038(10) | 0.0058(10)  | -0.0151(11) |
| C28 | 0.0460(15) | 0.0478(16) | 0.0212(13) | 0.0018(11)  | 0.0029(11)  | -0.0266(13) |
| C29 | 0.0483(16) | 0.0348(14) | 0.0295(14) | 0.0119(11)  | -0.0070(11) | -0.0143(12) |
| C30 | 0.0380(13) | 0.0241(12) | 0.0304(13) | 0.0030(10)  | -0.0032(10) | -0.0074(10) |
| C31 | 0.0236(11) | 0.0170(10) | 0.0216(11) | 0.0004(8)   | 0.0036(9)   | -0.0039(8)  |
| C32 | 0.0282(12) | 0.0210(11) | 0.0233(12) | 0.0017(9)   | -0.0006(9)  | -0.0060(9)  |
| C33 | 0.0276(12) | 0.0199(11) | 0.0316(13) | -0.0037(9)  | 0.0053(10)  | -0.0058(9)  |
| C34 | 0.0330(13) | 0.0194(11) | 0.0290(13) | 0.0023(9)   | 0.0086(10)  | -0.0046(9)  |
| C35 | 0.0351(13) | 0.0254(12) | 0.0223(12) | 0.0039(10)  | 0.0030(10)  | -0.0016(10) |
| C36 | 0.0251(11) | 0.0231(11) | 0.0241(12) | -0.0015(9)  | 0.0019(9)   | -0.0043(9)  |
| C37 | 0.0294(12) | 0.0174(10) | 0.0244(12) | 0.0038(9)   | -0.0041(9)  | -0.0068(9)  |
| C38 | 0.0421(14) | 0.0310(13) | 0.0285(13) | -0.0017(10) | -0.0018(11) | -0.0141(11) |
| C39 | 0.0606(18) | 0.0358(14) | 0.0285(14) | -0.0039(11) | -0.0058(12) | -0.0231(13) |
| C40 | 0.0590(18) | 0.0395(15) | 0.0387(16) | 0.0090(12)  | -0.0220(13) | -0.0297(13) |
| C41 | 0.0366(14) | 0.0467(16) | 0.0450(16) | 0.0085(13)  | -0.0102(12) | -0.0223(12) |
| C42 | 0.0340(13) | 0.0316(13) | 0.0345(14) | 0.0010(11)  | -0.0017(11) | -0.0116(10) |
| C43 | 0.0257(11) | 0.0200(11) | 0.0243(12) | -0.0008(9)  | -0.0030(9)  | -0.0033(9)  |
| C44 | 0.0337(13) | 0.0208(11) | 0.0329(14) | 0.0001(10)  | -0.0006(10) | -0.0059(10) |
| C45 | 0.0384(14) | 0.0239(12) | 0.0314(14) | -0.0012(10) | -0.0058(11) | 0.0025(10)  |
| C46 | 0.0292(13) | 0.0395(14) | 0.0288(13) | -0.0022(11) | -0.0004(10) | 0.0019(11)  |
| C47 | 0.0278(13) | 0.0391(14) | 0.0352(14) | 0.0024(11)  | -0.0009(10) | -0.0088(11) |
| C48 | 0.0283(12) | 0.0243(12) | 0.0300(13) | 0.0014(10)  | -0.0011(10) | -0.0057(9)  |

Table S21. Hydrogen atomic coordinates and isotropic atomic displacement parameters ( $\text{\AA}^2$ ) for  $[\text{PPh}_4]_2[\text{NbO}(\text{N}_3)_5]$ .

|     | x/a     | y/b     | z/c     | U(eq) |
|-----|---------|---------|---------|-------|
| H2  | 0.1593  | 0.3877  | 0.8479  | 0.034 |
| H3  | -0.0240 | 0.4034  | 0.8804  | 0.048 |
| H4  | -0.1380 | 0.4269  | 0.7561  | 0.054 |
| H5  | -0.0710 | 0.4291  | 0.5990  | 0.053 |
| H6  | 0.1118  | 0.4146  | 0.5633  | 0.039 |
| H8  | 0.3542  | 0.3253  | 0.8643  | 0.036 |
| H9  | 0.3980  | 0.4022  | 0.9946  | 0.044 |
| H10 | 0.4095  | 0.5742  | 0.9796  | 0.042 |
| H11 | 0.3855  | 0.6680  | 0.8335  | 0.036 |
| H12 | 0.3385  | 0.5936  | 0.7033  | 0.03  |
| H14 | 0.4300  | 0.3835  | 0.5059  | 0.034 |
| H15 | 0.4376  | 0.4897  | 0.3675  | 0.042 |
| H16 | 0.3111  | 0.6508  | 0.3488  | 0.042 |
| H17 | 0.1755  | 0.7069  | 0.4668  | 0.038 |
| H18 | 0.1639  | 0.6011  | 0.6050  | 0.033 |
| H20 | 0.2533  | 0.2275  | 0.5909  | 0.039 |
| H21 | 0.3573  | 0.0584  | 0.5576  | 0.049 |
| H22 | 0.5337  | 0.0001  | 0.6035  | 0.052 |
| H23 | 0.6075  | 0.1106  | 0.6805  | 0.048 |
| H24 | 0.5060  | 0.2810  | 0.7121  | 0.04  |
| H26 | 0.7849  | 0.1661  | 0.3449  | 0.032 |
| H27 | 0.7221  | 0.1556  | 0.5056  | 0.039 |
| H28 | 0.7949  | 0.0071  | 0.6010  | 0.043 |
| H29 | 0.9276  | -0.1324 | 0.5394  | 0.045 |
| H30 | 0.9901  | -0.1247 | 0.3796  | 0.037 |
| H32 | 0.9848  | 0.2023  | 0.2843  | 0.029 |
| H33 | 0.9744  | 0.3705  | 0.2185  | 0.032 |
| H34 | 0.8998  | 0.4240  | 0.0724  | 0.034 |
| H35 | 0.8312  | 0.3114  | -0.0087 | 0.035 |
| H36 | 0.8399  | 0.1425  | 0.0552  | 0.03  |
| H38 | 0.9605  | -0.1019 | 0.0579  | 0.04  |
| H39 | 0.8507  | -0.1777 | -0.0198 | 0.047 |
| H40 | 0.6723  | -0.1545 | 0.0341  | 0.05  |
| H41 | 0.6024  | -0.0553 | 0.1670  | 0.049 |
| H42 | 0.7132  | 0.0160  | 0.2489  | 0.04  |
| H44 | 1.0429  | -0.1954 | 0.2199  | 0.035 |
| H45 | 1.2214  | -0.2911 | 0.1857  | 0.04  |
| H46 | 1.3518  | -0.2034 | 0.1421  | 0.042 |
| H47 | 1.3091  | -0.0218 | 0.1399  | 0.041 |
| H48 | 1.1314  | 0.0753  | 0.1751  | 0.034 |

## Computational Optimized Coordinates

Table S22. Geometry parameters: selective bond lengths in angstroms.

| Molecule                                           | No   | functional | Nb-O  | Nb-N <sub>3</sub>            |
|----------------------------------------------------|------|------------|-------|------------------------------|
| [NbO(N <sub>3</sub> ) <sub>3</sub> ]               | 1    | B3LYP      | 1.708 | 1.995                        |
|                                                    |      | SVWN5      | 1.708 | 1.968                        |
| [NbO(N <sub>3</sub> ) <sub>4</sub> ] <sup>-</sup>  | 3(A) | B3LYP      | 1.717 | 2.088 (ave)                  |
|                                                    | 3(C) | SVWN5      | 1.722 | 2.058                        |
| [NbO(N <sub>3</sub> ) <sub>5</sub> ] <sup>2-</sup> | 4(A) | B3LYP      | 1.733 | 2.145 (eq)<br>2.252 (ax)     |
|                                                    |      | SVWN5      | 1.744 | 2.093 (ave,eq)<br>2.201 (ax) |
|                                                    | 4(B) | B3LYP      | 1.735 | 2.142 (ave,eq)<br>2.266 (ax) |
|                                                    |      | SVWN5      | 1.747 | 2.094 (ave,eq)<br>2.202 (ax) |
|                                                    | 4(C) | B3LYP      | 1.737 | 2.137 (ave,eq)<br>2.274 (ax) |
|                                                    | 4(D) | B3LYP      | 1.737 | 2.133 (eq)<br>2.272 (ax)     |
|                                                    |      | SVWN5      | 1.749 | 2.082 (eq)<br>2.210 (ax)     |

Table S23. Selected Frequencies ( $\nu$ ) ( $\text{cm}^{-1}$ ), IR Intensities ( $\text{km/mol}$ ) for the  $\text{N}_3$  groups and Nb-O.

| Molecule                                                | functional   | $\nu(\text{Nb-O})$ | IR I  | $\nu_{\text{sym}}(\text{N}_3)$ | IR I  | $\nu_{\text{as}}(\text{N}_3)$ | IR I   |
|---------------------------------------------------------|--------------|--------------------|-------|--------------------------------|-------|-------------------------------|--------|
| [NbO(N <sub>3</sub> ) <sub>3</sub> ] (1)                | B3LYP        | 1013.9             | 155.6 | 1395.4(a)                      | 656.3 | 2219.2(a)                     | 1730.2 |
|                                                         |              |                    |       | 1395.6(a)                      | 655.7 | 2219.4(a)                     | 1727.5 |
|                                                         | SVWN5        | 1005.3             | 137.8 | 1416.9(s)                      | 0.2   | 2245.3(s)                     | 37.3   |
|                                                         |              |                    |       | 1426.2(a)                      | 396.2 | 2237.0(a)                     | 1431.4 |
|                                                         |              |                    |       | 1426.9(a)                      | 397.1 | 2237.3(a)                     | 1434.2 |
|                                                         |              |                    |       | 1441.2(s)                      | 1.1   | 2257.1(s)                     | 10.2   |
| [NbO(N <sub>3</sub> ) <sub>4</sub> ] <sup>-</sup>       | B3LYP [3(A)] | 988.9              | 238.0 | 1401.2(a)                      | 334.6 | 2169.9(a)                     | 637.5  |
|                                                         |              |                    |       | 1402.9(a)                      | 46.0  | 2175.4(a)                     | 1553.7 |
|                                                         |              |                    |       | 1405.5(a)                      | 390.4 | 2189.0(a)                     | 2968.9 |
|                                                         | SVWN5 [3(C)] | 966.3              | 228.9 | 1419.2(s)                      | 26.4  | 2220.0(s)                     | 201.3  |
|                                                         |              |                    |       | 1440.7(a)                      | 201.3 | 2216.6(a)                     | 0.0    |
|                                                         |              |                    |       | 1440.7(a)                      | 201.3 | 2233.8(a)                     | 1978.3 |
|                                                         |              |                    |       | 1441.1(a)                      | 0.0   | 2233.8(a)                     | 1978.4 |
|                                                         |              |                    |       | 1455.8(s)                      | 22.0  | 2267.5(s)                     | 508.1  |
| [NbO(N <sub>3</sub> ) <sub>5</sub> ] <sup>2-</sup> 4(A) | B3LYP        | 948.9              | 290.7 | 1400.1                         | 228.9 | 2136.1                        | 0.0    |
|                                                         |              |                    |       | 1400.1                         | 228.8 | 2151.5                        | 2648.1 |
|                                                         |              |                    |       | 1401.4                         | 0.0   | 2151.5                        | 2647.8 |
|                                                         |              |                    |       | 1411.2                         | 52.0  | 2161.3                        | 2943.6 |
|                                                         | SVWN5        | 921.4              | 272.5 | 1427.3(s)                      | 46.0  | 2203.1(s)                     | 35.2   |
|                                                         |              |                    |       | 1408.7                         | 72.5  | 2190.2                        | 67.4   |
|                                                         |              |                    |       | 1409.9                         | 60.0  | 2195.7                        | 1978.0 |
|                                                         |              |                    |       | 1410.0                         | 118.3 | 2202.1                        | 2342.8 |
|                                                         |              |                    |       | 1414.5                         | 28.4  | 2203.3                        | 2284.8 |
|                                                         |              |                    |       | 1423.6(s)                      | 4.7   | 2240.2(s)                     | 56.6   |
| [NbO(N <sub>3</sub> ) <sub>5</sub> ] <sup>2-</sup> 4(B) | B3LYP        | 946.0              | 329.9 | 1393.2                         | 177.0 | 2143.0                        | 758.8  |
|                                                         |              |                    |       | 1404.1                         | 111.8 | 2146.8                        | 1597.1 |
|                                                         |              |                    |       | 1408.9                         | 209.1 | 2153.5                        | 3015.5 |
|                                                         |              |                    |       | 1410.9                         | 19.2  | 2161.9                        | 2242.5 |
|                                                         | SVWN5        | 919.1              | 294.6 | 1418.7(s)                      | 28.7  | 2202.4(s)                     | 294.6  |
|                                                         |              |                    |       | 1396.5                         | 74.0  | 2184.4                        | 395.3  |
|                                                         |              |                    |       | 1400.4                         | 45.3  | 2188.6                        | 1681.3 |
|                                                         |              |                    |       | 1412.1                         | 102.5 | 2202.3                        | 2046.6 |
|                                                         |              |                    |       | 1414.9                         | 27.4  | 2204.7                        | 1896.4 |
|                                                         |              |                    |       | 1421.8(s)                      | 16.9  | 2237.7(s)                     | 235.3  |
| [NbO(N <sub>3</sub> ) <sub>5</sub> ] <sup>2-</sup> 4(D) | B3LYP        | 943.5              | 420.1 | 1415.0                         | 36.8  | 2144.5                        | 0.0    |
|                                                         |              |                    |       | 1415.1                         | 212.0 | 2148.9                        | 454.7  |
|                                                         |              |                    |       | 1415.1                         | 211.8 | 2163.7                        | 2460.5 |
|                                                         |              |                    |       | 1416.3                         | 0.0   | 2163.8                        | 2460.4 |
|                                                         | SVWN5        | 911.9              | 352.5 | 1427.9(s)                      | 18.3  | 2215.4(s)                     | 1284.7 |
|                                                         |              |                    |       | 1402.8                         | 28.5  | 2186.6                        | 593.4  |
|                                                         |              |                    |       | 1422.0                         | 102.6 | 2198.6                        | 1.3    |
|                                                         |              |                    |       | 1422.9                         | 101.8 | 2212.9                        | 2237.0 |
|                                                         |              |                    |       | 1425.0                         | 0.6   | 2213.9                        | 2268.3 |
|                                                         |              |                    |       | 1433.9(s)                      | 2.3   | 2250.2(s)                     | 600.4  |

(s) = symmetric coupling. (a) = antisymmetric coupling

Table S24. Reaction energies in kcal/mol.

| Reaction                                                                                                                                               | B3LYP/<br>DZVP2/D-PP |                   | SVWN5/<br>DZVP2/D-PP |                   | MP2/aD/aD-PP <sup>a</sup> |                   |                   |                     |                    |
|--------------------------------------------------------------------------------------------------------------------------------------------------------|----------------------|-------------------|----------------------|-------------------|---------------------------|-------------------|-------------------|---------------------|--------------------|
|                                                                                                                                                        | $\Delta H_{0K}$      | $\Delta H_{298K}$ | $\Delta H_{0K}$      | $\Delta H_{298K}$ | $\Delta H_{0K}$           | $\Delta H_{298K}$ | $\Delta G_{298K}$ | $\Delta G_{solv}^b$ | $\Delta G_{sol}^c$ |
| $[\text{NbO}(\text{N}_3)_3] + \text{N}_3^- \rightarrow [\text{NbO}(\text{N}_3)_4]^-$                                                                   | -62.7                | -61.6             | -74.7                | -74.4             | -61.8                     | -60.8             | -54.4             | 33.5                | -20.9              |
| $[\text{NbO}(\text{N}_3)_4]^- + \text{N}_3^- \rightarrow [\text{NbO}(\text{N}_3)_5]^{2-}$                                                              | 23.5                 | 23.6              | 13.2                 | 13.1              | 12.2                      | 12.3              | 22.2              | -35.4               | -13.2              |
| $[\text{NbO}(\text{N}_3)_3] + \text{CH}_3\text{CN} \rightarrow [\text{NbO}(\text{N}_3)_3 \cdot \text{CH}_3\text{CN}]$                                  | -13.4                | -12.1             | -24.4                | -24.3             | -18.6                     | -17.4             | -11.5             | 2.8                 | -8.7               |
| $[\text{NbO}(\text{N}_3)_3 \cdot \text{CH}_3\text{CN}] + \text{CH}_3\text{CN} \rightarrow$<br>$[\text{NbO}(\text{N}_3)_3 \cdot 2\text{CH}_3\text{CN}]$ | -9.1                 | -8.8              | -19.8                | -19.7             | -19.6                     | -19.2             | -9.7              | 1.8                 | -7.9               |
| $[\text{NbO}(\text{N}_3)_3] + \text{bipy} \rightarrow [(\text{bipy})\text{NbO}(\text{N}_3)_3]$                                                         | -26.0                | -25.0             | -48.6                | -48.7             | -62.5                     | -61.5             | -50.9             | 1.9                 | -49.0              |

<sup>a</sup>MP2/aug-cc-pVDZ/aug-cc-pVDZ-PP at SVWN5 optimized geometries



Table S25. Frequencies (cm<sup>-1</sup>), IR Intensities (km/mol) and Raman Activities (Å<sup>4</sup>/amu).  
[NbO(N<sub>3</sub>)<sub>3</sub>], C<sub>3v</sub>

| B3LYP  |        |       | SVWN5  |        |       |
|--------|--------|-------|--------|--------|-------|
| Freq   | IR     | Raman | Freq   | IR     | Raman |
| 34.0   | 0.2    | 17.0  | 34.6   | 0.2    | 18.1  |
| 34.6   | 0.2    | 17.1  | 35.2   | 0.2    | 18.2  |
| 44.8   | 0.3    | 2.6   | 40.4   | 0.3    | 1.3   |
| 72.0   | 0.4    | 9.5   | 68.2   | 0.4    | 11.1  |
| 72.0   | 0.4    | 9.5   | 68.4   | 0.4    | 11.2  |
| 95.1   | 0.0    | 0.0   | 100.1  | 0.0    | 0.0   |
| 175.3  | 0.4    | 1.7   | 169.7  | 2.1    | 8.9   |
| 175.5  | 0.4    | 1.8   | 171.4  | 0.2    | 2.0   |
| 176.7  | 2.6    | 10.9  | 171.6  | 0.2    | 2.0   |
| 260.7  | 3.7    | 4.7   | 251.7  | 3.0    | 3.3   |
| 260.7  | 3.7    | 4.7   | 251.8  | 3.1    | 3.4   |
| 440.3  | 11.3   | 44.5  | 437.5  | 7.2    | 46.3  |
| 476.9  | 177.7  | 6.9   | 482.2  | 126.2  | 8.4   |
| 477.0  | 178.0  | 6.9   | 482.5  | 125.4  | 8.4   |
| 558.1  | 2.6    | 0.0   | 549.4  | 2.5    | 0.0   |
| 558.7  | 20.0   | 0.0   | 550.0  | 19.4   | 0.0   |
| 558.8  | 22.1   | 0.0   | 550.2  | 21.8   | 0.0   |
| 581.3  | 37.9   | 1.1   | 568.1  | 33.3   | 7.6   |
| 581.4  | 38.3   | 1.1   | 569.2  | 34.4   | 2.1   |
| 582.7  | 37.6   | 6.3   | 569.7  | 35.8   | 2.3   |
| 1013.9 | 155.6  | 34.3  | 1005.3 | 137.8  | 34.4  |
| 1395.4 | 656.3  | 7.4   | 1426.2 | 396.2  | 15.1  |
| 1395.6 | 655.7  | 7.4   | 1426.9 | 397.1  | 15.2  |
| 1416.9 | 0.2    | 8.8   | 1441.2 | 1.1    | 38.2  |
| 2219.2 | 1730.2 | 189.6 | 2237.0 | 1431.4 | 195.6 |
| 2219.4 | 1727.5 | 190.2 | 2237.3 | 1434.2 | 196.0 |
| 2245.3 | 37.3   | 738.4 | 2257.1 | 10.2   | 734.5 |

[NbO(N<sub>3</sub>)<sub>4</sub>]<sup>-</sup>, C<sub>2</sub>

| B3LYP [3(A)] |     |       | SVWN5 [3(B)] |     |       |
|--------------|-----|-------|--------------|-----|-------|
| Freq         | IR  | Raman | Freq         | IR  | Raman |
| 17.6         | 1.0 | 3.6   | 7.6          | 1.9 | 3.0   |
| 22.5         | 2.0 | 7.4   | 7.6          | 1.9 | 3.0   |
| 23.4         | 0.2 | 10.7  | 9.5          | 0.0 | 11.3  |
| 29.4         | 0.0 | 14.8  | 25.6         | 1.9 | 25.7  |
| 38.4         | 0.6 | 18.5  | 28.6         | 0.0 | 29.7  |
| 55.4         | 1.1 | 11.5  | 42.7         | 0.9 | 3.5   |
| 59.7         | 0.1 | 10.6  | 42.7         | 0.9 | 3.5   |
| 78.8         | 1.0 | 2.3   | 42.9         | 0.0 | 0.0   |

|        |        |       |        |        |       |
|--------|--------|-------|--------|--------|-------|
| 89.4   | 0.0    | 13.4  | 72.7   | 0.0    | 0.3   |
| 200.6  | 15.2   | 3.0   | 220.8  | 1.7    | 5.3   |
| 206.0  | 2.6    | 5.9   | 222.3  | 1.7    | 2.5   |
| 215.2  | 18.0   | 1.8   | 222.3  | 1.7    | 2.5   |
| 243.1  | 7.0    | 4.3   | 245.0  | 12.1   | 3.5   |
| 260.2  | 18.5   | 2.1   | 245.0  | 12.1   | 3.5   |
| 266.6  | 0.8    | 13.6  | 282.3  | 0.0    | 12.0  |
| 328.5  | 2.4    | 4.0   | 317.2  | 0.0    | 3.1   |
| 404.6  | 11.0   | 40.2  | 378.5  | 10.8   | 45.6  |
| 409.7  | 346.3  | 1.6   | 422.6  | 308.1  | 0.7   |
| 418.4  | 357.2  | 1.2   | 422.6  | 308.1  | 0.7   |
| 570.7  | 18.0   | 0.1   | 554.2  | 14.5   | 0.0   |
| 572.5  | 5.1    | 2.1   | 554.2  | 14.5   | 0.0   |
| 580.6  | 14.4   | 0.1   | 558.0  | 0.0    | 0.0   |
| 582.5  | 0.5    | 0.8   | 559.6  | 0.0    | 0.8   |
| 591.1  | 11.3   | 1.2   | 560.4  | 0.0    | 0.1   |
| 592.4  | 17.4   | 1.3   | 563.5  | 9.4    | 0.4   |
| 598.6  | 45.3   | 1.1   | 563.5  | 9.4    | 0.4   |
| 599.8  | 0.0    | 0.7   | 564.3  | 12.5   | 0.3   |
| 988.9  | 238.0  | 82.6  | 966.3  | 228.9  | 108.1 |
| 1401.2 | 334.6  | 14.4  | 1440.7 | 201.3  | 17.2  |
| 1402.9 | 46.0   | 59.0  | 1440.7 | 201.3  | 17.2  |
| 1405.5 | 390.4  | 0.6   | 1441.1 | 0.0    | 73.2  |
| 1419.2 | 26.4   | 57.1  | 1455.8 | 22.0   | 121.5 |
| 2169.9 | 637.5  | 108.2 | 2216.6 | 0.0    | 179.5 |
| 2175.4 | 1553.7 | 88.4  | 2233.8 | 1978.3 | 48.6  |
| 2189.0 | 2968.9 | 16.1  | 2233.8 | 1978.4 | 48.6  |
| 2220.0 | 201.3  | 516.9 | 2267.5 | 508.1  | 557.7 |

**[NbO(N<sub>3</sub>)<sub>5</sub>]<sup>2-</sup> [4(A)], C<sub>s</sub>**

| B3LYP |     |       | SVWN5 |     |       |
|-------|-----|-------|-------|-----|-------|
| Freq  | IR  | Raman | Freq  | IR  | Raman |
| 21.5  | 1.5 | 18.3  | 20.7  | 0.1 | 15.7  |
| 21.5  | 1.5 | 18.3  | 20.9  | 0.1 | 15.7  |
| 29.7  | 4.6 | 0.0   | 21.9  | 0.0 | 7.9   |
| 29.7  | 4.6 | 0.0   | 28.9  | 6.8 | 4.0   |
| 34.0  | 0.0 | 9.0   | 29.0  | 6.7 | 4.5   |
| 35.6  | 0.0 | 28.3  | 32.8  | 0.1 | 32.4  |
| 46.9  | 2.8 | 24.2  | 32.9  | 3.9 | 19.2  |
| 58.6  | 0.0 | 0.0   | 43.5  | 0.7 | 4.4   |
| 69.6  | 3.7 | 0.4   | 44.0  | 0.6 | 2.9   |
| 69.6  | 3.7 | 0.4   | 72.1  | 0.0 | 0.0   |

|        |        |       |        |        |       |
|--------|--------|-------|--------|--------|-------|
| 140.6  | 0.0    | 13.5  | 142.4  | 0.0    | 17.0  |
| 149.9  | 0.1    | 9.6   | 155.2  | 1.6    | 7.4   |
| 149.9  | 0.1    | 9.6   | 155.3  | 1.6    | 7.5   |
| 192.3  | 0.1    | 1.0   | 196.3  | 0.0    | 0.5   |
| 192.4  | 0.1    | 1.0   | 196.4  | 0.0    | 0.5   |
| 197.6  | 0.9    | 17.8  | 199.8  | 0.0    | 20.0  |
| 237.3  | 0.0    | 8.0   | 237.1  | 0.0    | 12.5  |
| 246.4  | 172.5  | 1.5   | 267.7  | 140.3  | 2.0   |
| 290.7  | 58.4   | 0.9   | 277.9  | 32.0   | 0.1   |
| 290.7  | 58.6   | 0.9   | 278.2  | 32.7   | 0.1   |
| 309.5  | 0.0    | 8.2   | 319.9  | 1.1    | 0.7   |
| 351.6  | 434.8  | 0.7   | 369.0  | 102.7  | 24.7  |
| 351.6  | 434.9  | 0.7   | 372.6  | 386.4  | 0.4   |
| 370.8  | 21.0   | 36.2  | 373.0  | 303.1  | 7.7   |
| 588.7  | 0.0    | 0.0   | 574.8  | 6.9    | 0.1   |
| 590.7  | 15.1   | 0.2   | 575.8  | 13.2   | 0.1   |
| 590.7  | 15.1   | 0.2   | 576.2  | 4.5    | 0.1   |
| 592.8  | 0.0    | 0.9   | 578.1  | 1.5    | 0.3   |
| 604.8  | 5.1    | 0.3   | 579.7  | 4.7    | 0.8   |
| 604.8  | 5.1    | 0.3   | 583.8  | 7.6    | 0.8   |
| 606.8  | 0.0    | 0.6   | 584.6  | 11.7   | 1.5   |
| 611.2  | 22.5   | 2.0   | 587.0  | 13.4   | 0.9   |
| 611.2  | 22.5   | 2.0   | 594.3  | 9.2    | 0.9   |
| 612.0  | 18.0   | 0.5   | 594.4  | 9.2    | 0.9   |
| 948.9  | 290.7  | 138.4 | 921.4  | 272.5  | 130.5 |
| 1400.1 | 228.9  | 19.3  | 1408.7 | 72.5   | 53.6  |
| 1400.1 | 228.8  | 19.3  | 1409.9 | 60.0   | 67.4  |
| 1401.4 | 0.0    | 87.2  | 1410.0 | 118.3  | 26.4  |
| 1411.2 | 52.0   | 71.9  | 1414.5 | 28.4   | 93.4  |
| 1427.3 | 46.0   | 130.2 | 1423.6 | 4.7    | 205.8 |
| 2136.1 | 0.0    | 28.5  | 2190.2 | 67.4   | 99.2  |
| 2151.5 | 2648.1 | 50.6  | 2195.7 | 1978.0 | 101.3 |
| 2151.5 | 2647.8 | 50.6  | 2202.1 | 2342.8 | 30.9  |
| 2161.3 | 2943.6 | 81.7  | 2203.3 | 2284.8 | 31.9  |
| 2203.1 | 35.2   | 407.9 | 2240.2 | 56.6   | 476.2 |
|        |        |       |        |        |       |

**[NbO(N<sub>3</sub>)<sub>5</sub>]<sup>2-</sup> [4(B)], C<sub>s</sub>**

| B3LYP |     |       | SVWN5 |     |       |
|-------|-----|-------|-------|-----|-------|
| Freq  | IR  | Raman | Freq  | IR  | Raman |
| 16.9  | 0.1 | 4.5   | 14.0  | 0.1 | 5.7   |
| 25.3  | 3.1 | 6.9   | 24.4  | 2.6 | 8.2   |

|        |        |       |        |        |       |
|--------|--------|-------|--------|--------|-------|
| 28.8   | 0.0    | 24.3  | 25.8   | 0.4    | 16.2  |
| 31.9   | 4.0    | 13.6  | 29.4   | 2.7    | 12.1  |
| 37.9   | 0.3    | 19.2  | 30.2   | 0.1    | 22.5  |
| 38.8   | 1.0    | 9.3   | 32.5   | 3.8    | 21.4  |
| 45.2   | 1.5    | 16.0  | 33.7   | 0.3    | 12.7  |
| 60.4   | 3.5    | 0.1   | 51.4   | 8.4    | 0.5   |
| 75.3   | 2.3    | 0.5   | 55.8   | 0.6    | 2.1   |
| 76.9   | 5.8    | 0.4   | 76.2   | 0.7    | 0.7   |
| 137.8  | 0.4    | 13.1  | 135.8  | 0.6    | 15.4  |
| 147.9  | 0.3    | 9.9   | 147.2  | 1.9    | 9.7   |
| 153.7  | 0.1    | 18.0  | 157.9  | 0.4    | 14.8  |
| 196.9  | 3.2    | 6.1   | 199.4  | 0.4    | 8.5   |
| 218.5  | 6.5    | 3.1   | 219.7  | 6.4    | 3.6   |
| 225.4  | 17.6   | 2.2   | 224.2  | 4.5    | 0.7   |
| 233.0  | 0.0    | 8.2   | 227.9  | 5.3    | 7.5   |
| 244.5  | 108.7  | 5.8   | 245.0  | 9.5    | 6.5   |
| 250.8  | 11.0   | 1.7   | 257.9  | 58.0   | 6.1   |
| 277.3  | 72.2   | 5.3   | 282.8  | 72.7   | 1.1   |
| 304.8  | 29.3   | 12.0  | 321.5  | 28.8   | 3.9   |
| 352.4  | 407.8  | 0.2   | 369.3  | 132.2  | 18.8  |
| 363.4  | 388.9  | 0.0   | 377.2  | 242.6  | 12.4  |
| 365.5  | 11.3   | 33.3  | 386.4  | 323.9  | 0.5   |
| 588.4  | 3.7    | 0.2   | 572.7  | 9.3    | 0.2   |
| 588.5  | 13.9   | 0.2   | 573.0  | 2.8    | 0.1   |
| 590.4  | 3.4    | 0.1   | 574.5  | 8.1    | 0.4   |
| 595.3  | 6.6    | 0.3   | 581.1  | 12.2   | 1.0   |
| 601.8  | 18.1   | 0.4   | 582.4  | 0.3    | 1.2   |
| 603.3  | 5.7    | 0.9   | 582.8  | 10.0   | 0.0   |
| 604.1  | 12.7   | 1.0   | 584.4  | 14.8   | 0.3   |
| 604.9  | 8.1    | 1.0   | 589.1  | 2.5    | 0.6   |
| 610.6  | 14.7   | 2.2   | 593.3  | 11.6   | 2.4   |
| 616.8  | 15.3   | 2.2   | 596.3  | 13.6   | 1.7   |
| 946.0  | 329.9  | 133.3 | 919.1  | 294.6  | 129.4 |
| 1393.2 | 177.0  | 46.7  | 1396.5 | 74.0   | 55.1  |
| 1404.1 | 111.8  | 62.1  | 1400.4 | 45.3   | 54.6  |
| 1408.9 | 209.1  | 27.5  | 1412.1 | 102.5  | 27.9  |
| 1410.9 | 19.2   | 59.1  | 1414.9 | 27.4   | 86.4  |
| 1418.7 | 28.7   | 99.7  | 1421.8 | 16.9   | 167.1 |
| 2143.0 | 758.8  | 21.5  | 2184.4 | 395.3  | 67.5  |
| 2146.8 | 1597.1 | 90.1  | 2188.6 | 1681.3 | 94.7  |
| 2153.5 | 3015.5 | 30.9  | 2202.3 | 2046.6 | 51.6  |
| 2161.9 | 2242.5 | 46.8  | 2204.7 | 1896.4 | 48.5  |
| 2202.4 | 294.6  | 420.3 | 2237.7 | 235.3  | 425.5 |

**[NbO(N<sub>3</sub>)<sub>5</sub>]<sup>2-</sup> [4(D)], C<sub>1</sub>**

| B3LYP  |       |       | SVWN5  |       |       |
|--------|-------|-------|--------|-------|-------|
| Freq   | IR    | Raman | Freq   | IR    | Raman |
| 19.0   | 0.4   | 0.0   | 15.2   | 0.0   | 11.3  |
| 19.1   | 0.4   | 0.0   | 17.2   | 0.4   | 0.0   |
| 32.2   | 0.0   | 12.4  | 17.2   | 0.3   | 0.0   |
| 34.1   | 0.0   | 27.5  | 25.7   | 1.6   | 21.9  |
| 39.6   | 0.3   | 12.1  | 26.4   | 0.7   | 15.5  |
| 39.6   | 0.3   | 12.1  | 27.4   | 0.6   | 14.8  |
| 42.9   | 0.4   | 25.8  | 32.1   | 0.0   | 33.0  |
| 50.7   | 0.0   | 0.0   | 44.3   | 8.8   | 2.3   |
| 60.8   | 10.6  | 0.2   | 44.7   | 9.0   | 2.1   |
| 60.8   | 10.6  | 0.2   | 69.6   | 0.0   | 0.0   |
| 149.9  | 0.0   | 11.1  | 156.8  | 0.0   | 10.6  |
| 163.8  | 0.9   | 0.4   | 168.5  | 4.0   | 2.4   |
| 163.9  | 0.9   | 0.4   | 168.6  | 3.9   | 2.4   |
| 207.3  | 22.4  | 6.9   | 217.9  | 2.1   | 15.6  |
| 233.6  | 4.2   | 0.8   | 227.8  | 4.0   | 2.7   |
| 233.6  | 4.3   | 0.8   | 228.4  | 4.8   | 2.9   |
| 237.7  | 76.1  | 11.9  | 236.8  | 9.9   | 3.3   |
| 238.7  | 0.0   | 9.7   | 237.3  | 11.0  | 3.3   |
| 239.7  | 24.3  | 6.8   | 240.5  | 0.0   | 14.6  |
| 239.8  | 24.3  | 6.8   | 257.1  | 84.0  | 1.4   |
| 284.9  | 0.0   | 5.2   | 300.5  | 0.0   | 0.0   |
| 345.4  | 9.9   | 33.1  | 349.8  | 15.0  | 33.6  |
| 353.8  | 412.2 | 0.1   | 373.1  | 364.2 | 0.5   |
| 353.8  | 412.2 | 0.1   | 373.9  | 361.0 | 0.5   |
| 587.4  | 14.9  | 0.0   | 568.2  | 0.9   | 0.3   |
| 587.4  | 14.9  | 0.0   | 569.1  | 11.9  | 0.1   |
| 587.6  | 0.0   | 0.0   | 570.0  | 14.0  | 0.2   |
| 591.5  | 0.0   | 0.1   | 570.9  | 13.9  | 1.5   |
| 595.4  | 0.0   | 0.2   | 572.2  | 7.6   | 0.0   |
| 596.4  | 20.8  | 0.1   | 572.4  | 8.7   | 0.0   |
| 596.5  | 20.8  | 0.1   | 574.7  | 0.0   | 0.0   |
| 599.5  | 19.3  | 0.7   | 576.5  | 0.0   | 0.0   |
| 599.9  | 0.5   | 0.5   | 587.5  | 4.5   | 0.5   |
| 600.0  | 0.4   | 0.5   | 587.5  | 4.4   | 0.5   |
| 943.5  | 420.1 | 173.4 | 911.9  | 352.5 | 180.3 |
| 1415.0 | 36.8  | 46.2  | 1402.8 | 28.5  | 57.7  |
| 1415.1 | 212.0 | 8.5   | 1422.0 | 102.6 | 6.0   |
| 1415.1 | 211.8 | 8.6   | 1422.9 | 101.8 | 5.6   |
| 1416.3 | 0.0   | 85.6  | 1425.0 | 0.6   | 108.3 |

|        |        |       |        |        |       |
|--------|--------|-------|--------|--------|-------|
| 1427.9 | 18.3   | 91.2  | 1433.9 | 2.3    | 182.2 |
| 2144.5 | 0.0    | 31.6  | 2186.6 | 593.4  | 80.7  |
| 2148.9 | 454.7  | 75.1  | 2198.6 | 1.3    | 113.7 |
| 2163.7 | 2460.5 | 28.5  | 2212.9 | 2237.0 | 15.7  |
| 2163.8 | 2460.4 | 28.5  | 2213.9 | 2268.3 | 14.4  |
| 2215.4 | 1284.7 | 371.6 | 2250.2 | 600.4  | 447.3 |

**[(bipy)NbO(N<sub>3</sub>)<sub>3</sub>] [2(A)], C<sub>s</sub>**

| B3LYP |       |       | SVWN5 |       |       |
|-------|-------|-------|-------|-------|-------|
| Freq  | IR    | Raman | Freq  | IR    | Raman |
| 13.2  | 2.2   | 3.0   | 25.0  | 0.2   | 6.3   |
| 24.2  | 0.2   | 20.1  | 28.0  | 3.1   | 4.1   |
| 28.0  | 0.0   | 3.1   | 34.3  | 0.2   | 11.3  |
| 40.2  | 0.1   | 10.6  | 36.3  | 0.1   | 10.8  |
| 40.8  | 0.6   | 3.4   | 48.2  | 1.4   | 1.1   |
| 55.6  | 1.3   | 18.6  | 65.7  | 1.5   | 17.2  |
| 72.2  | 0.4   | 1.2   | 74.0  | 2.3   | 2.0   |
| 81.3  | 1.3   | 2.7   | 82.6  | 0.8   | 4.6   |
| 97.2  | 0.8   | 11.2  | 94.5  | 1.0   | 9.8   |
| 112.6 | 0.3   | 0.7   | 115.0 | 0.1   | 8.8   |
| 121.8 | 0.1   | 0.8   | 132.6 | 0.9   | 0.9   |
| 127.4 | 0.3   | 2.6   | 138.8 | 1.6   | 1.6   |
| 155.7 | 0.1   | 1.6   | 169.6 | 0.9   | 4.2   |
| 203.0 | 2.0   | 2.5   | 200.7 | 0.2   | 3.3   |
| 207.7 | 6.3   | 2.5   | 202.4 | 0.8   | 0.7   |
| 214.0 | 10.7  | 3.4   | 210.6 | 2.4   | 2.3   |
| 228.3 | 2.0   | 5.2   | 220.5 | 0.5   | 2.0   |
| 229.5 | 1.5   | 1.9   | 230.4 | 13.5  | 2.1   |
| 246.8 | 6.7   | 1.5   | 233.0 | 2.2   | 1.3   |
| 261.2 | 0.5   | 3.1   | 260.0 | 0.0   | 2.6   |
| 274.4 | 31.0  | 2.0   | 275.4 | 11.7  | 1.1   |
| 350.7 | 0.6   | 3.4   | 353.4 | 0.6   | 7.0   |
| 383.6 | 53.8  | 14.5  | 413.6 | 14.4  | 0.4   |
| 421.1 | 167.4 | 32.7  | 415.7 | 5.9   | 27.5  |
| 421.6 | 230.5 | 2.2   | 427.3 | 4.3   | 0.1   |
| 433.0 | 22.8  | 0.0   | 428.8 | 168.8 | 12.3  |
| 438.0 | 19.7  | 0.8   | 445.5 | 42.3  | 0.5   |
| 457.8 | 2.3   | 0.4   | 450.8 | 91.1  | 6.7   |
| 462.9 | 4.5   | 2.7   | 463.0 | 9.0   | 3.5   |
| 562.2 | 0.2   | 0.1   | 541.5 | 0.3   | 0.6   |
| 566.9 | 8.1   | 0.2   | 560.0 | 3.9   | 0.4   |
| 578.2 | 13.3  | 0.3   | 560.1 | 0.5   | 0.5   |
| 579.9 | 1.6   | 0.7   | 562.7 | 5.8   | 0.2   |

|        |       |       |        |       |       |
|--------|-------|-------|--------|-------|-------|
| 591.8  | 22.7  | 0.4   | 573.0  | 20.0  | 0.2   |
| 600.1  | 41.1  | 0.6   | 598.3  | 70.0  | 2.3   |
| 600.2  | 5.6   | 1.8   | 600.3  | 0.9   | 1.1   |
| 639.4  | 7.0   | 8.7   | 622.3  | 5.1   | 9.1   |
| 659.4  | 9.7   | 3.4   | 639.9  | 3.4   | 0.1   |
| 660.8  | 8.7   | 1.0   | 643.8  | 11.2  | 3.5   |
| 749.8  | 1.1   | 0.3   | 718.5  | 2.2   | 0.3   |
| 760.4  | 28.2  | 0.2   | 735.4  | 125.1 | 0.2   |
| 773.8  | 91.6  | 0.1   | 746.6  | 5.3   | 0.6   |
| 779.8  | 1.6   | 15.8  | 768.9  | 1.0   | 13.8  |
| 829.1  | 0.1   | 1.3   | 800.6  | 0.0   | 1.7   |
| 895.6  | 0.1   | 0.3   | 856.2  | 0.0   | 0.2   |
| 905.2  | 0.0   | 0.5   | 865.6  | 0.6   | 0.2   |
| 978.6  | 226.3 | 75.2  | 944.8  | 0.1   | 0.3   |
| 993.3  | 0.0   | 0.4   | 947.5  | 200.9 | 68.0  |
| 1000.5 | 0.2   | 0.1   | 955.4  | 0.2   | 0.1   |
| 1013.7 | 0.0   | 0.7   | 968.5  | 0.1   | 0.4   |
| 1018.3 | 0.2   | 0.6   | 980.0  | 0.5   | 0.6   |
| 1026.4 | 4.0   | 4.7   | 1008.9 | 4.1   | 3.3   |
| 1034.1 | 21.0  | 115.5 | 1018.6 | 17.1  | 81.2  |
| 1053.6 | 2.2   | 3.6   | 1039.4 | 1.1   | 10.5  |
| 1082.0 | 8.8   | 44.3  | 1056.9 | 6.2   | 21.4  |
| 1094.4 | 4.2   | 1.0   | 1059.1 | 8.0   | 42.7  |
| 1129.0 | 9.2   | 1.7   | 1099.1 | 12.6  | 3.4   |
| 1142.9 | 0.4   | 0.4   | 1114.0 | 0.2   | 0.5   |
| 1178.1 | 8.3   | 10.2  | 1126.8 | 3.3   | 7.4   |
| 1192.6 | 6.7   | 3.5   | 1139.2 | 5.7   | 6.0   |
| 1303.6 | 9.6   | 10.9  | 1252.8 | 3.1   | 11.9  |
| 1308.1 | 1.4   | 30.0  | 1269.2 | 3.9   | 8.3   |
| 1318.4 | 1.5   | 185.3 | 1320.1 | 1.8   | 204.1 |
| 1343.2 | 8.3   | 42.5  | 1384.7 | 2.6   | 7.7   |
| 1347.2 | 17.7  | 38.5  | 1390.9 | 94.7  | 34.5  |
| 1392.9 | 307.6 | 19.6  | 1397.2 | 66.8  | 14.8  |
| 1398.1 | 300.2 | 20.1  | 1398.4 | 26.0  | 8.7   |
| 1412.9 | 134.0 | 22.7  | 1419.2 | 2.3   | 43.2  |
| 1459.9 | 9.7   | 25.0  | 1434.6 | 207.4 | 51.2  |
| 1473.5 | 70.0  | 0.9   | 1445.5 | 82.3  | 0.8   |
| 1507.3 | 40.0  | 1.7   | 1458.1 | 43.3  | 2.1   |
| 1526.3 | 8.0   | 170.1 | 1508.0 | 2.3   | 173.5 |
| 1615.9 | 14.6  | 140.0 | 1600.9 | 7.1   | 145.7 |
| 1629.5 | 14.9  | 1.0   | 1618.1 | 14.5  | 0.6   |
| 1646.0 | 32.2  | 318.4 | 1635.9 | 21.5  | 335.7 |

|        |        |       |        |       |       |
|--------|--------|-------|--------|-------|-------|
| 1657.9 | 25.4   | 11.7  | 1646.6 | 21.6  | 11.8  |
| 2176.5 | 1407.2 | 68.4  | 2196.8 | 686.1 | 38.4  |
| 2183.0 | 1136.0 | 130.1 | 2203.1 | 952.4 | 76.2  |
| 2222.8 | 967.2  | 422.9 | 2243.8 | 940.6 | 415.3 |
| 3212.8 | 3.5    | 40.7  | 3100.3 | 17.1  | 32.3  |
| 3215.9 | 4.3    | 100.6 | 3106.3 | 5.5   | 40.2  |
| 3219.9 | 0.7    | 73.9  | 3138.4 | 0.7   | 110.3 |
| 3227.5 | 3.2    | 33.9  | 3139.4 | 0.1   | 38.0  |
| 3239.5 | 2.6    | 43.4  | 3153.7 | 0.1   | 14.0  |
| 3241.7 | 1.8    | 322.2 | 3157.0 | 0.0   | 107.0 |
| 3244.2 | 0.4    | 18.0  | 3160.7 | 0.7   | 57.2  |
| 3255.6 | 3.1    | 173.0 | 3161.3 | 0.1   | 448.7 |

**[(bipy)NbO(N<sub>3</sub>)<sub>3</sub>] [2(B)]**

| B3LYP |       |       | SVWN5 |       |       |
|-------|-------|-------|-------|-------|-------|
| Freq  | IR    | Raman | Freq  | IR    | Raman |
| 18.0  | 1.9   | 7.3   | 22.2  | 0.2   | 7.3   |
| 23.8  | 0.4   | 7.9   | 23.4  | 3.1   | 4.2   |
| 27.2  | 0.5   | 12.2  | 33.1  | 0.2   | 10.0  |
| 36.1  | 0.1   | 7.6   | 35.1  | 0.1   | 10.8  |
| 39.3  | 0.2   | 8.3   | 48.1  | 1.4   | 1.5   |
| 48.1  | 1.9   | 2.3   | 64.3  | 1.5   | 17.1  |
| 72.1  | 0.3   | 9.2   | 74.3  | 2.0   | 2.2   |
| 74.2  | 0.3   | 8.6   | 82.5  | 1.1   | 3.7   |
| 95.3  | 0.6   | 9.9   | 96.4  | 1.0   | 10.0  |
| 102.1 | 0.7   | 3.8   | 115.3 | 0.1   | 9.3   |
| 122.2 | 0.5   | 2.0   | 133.0 | 0.8   | 1.0   |
| 130.2 | 0.2   | 0.3   | 138.6 | 1.6   | 1.6   |
| 155.2 | 0.0   | 1.4   | 169.4 | 0.9   | 4.2   |
| 182.2 | 3.7   | 2.8   | 203.0 | 0.4   | 2.4   |
| 193.5 | 3.5   | 4.0   | 203.0 | 1.0   | 1.0   |
| 208.3 | 6.3   | 1.7   | 209.2 | 2.1   | 2.4   |
| 223.0 | 2.6   | 2.8   | 220.6 | 1.4   | 2.0   |
| 232.7 | 2.5   | 0.6   | 232.3 | 12.0  | 2.3   |
| 257.2 | 4.3   | 6.4   | 232.3 | 2.3   | 1.4   |
| 267.7 | 7.9   | 3.4   | 258.6 | 0.0   | 2.5   |
| 274.1 | 26.2  | 2.0   | 276.9 | 11.7  | 1.0   |
| 351.0 | 0.8   | 3.8   | 352.8 | 0.6   | 6.9   |
| 390.5 | 87.9  | 15.1  | 414.7 | 13.5  | 0.4   |
| 420.1 | 228.8 | 4.6   | 415.6 | 6.0   | 27.4  |
| 424.1 | 167.3 | 29.7  | 426.8 | 3.8   | 0.1   |
| 431.7 | 39.4  | 0.5   | 429.0 | 168.8 | 12.4  |
| 437.3 | 5.6   | 0.7   | 445.4 | 40.6  | 0.5   |



|        |       |       |        |       |       |
|--------|-------|-------|--------|-------|-------|
| 458.1  | 4.2   | 0.5   | 450.8  | 94.2  | 6.7   |
| 463.6  | 5.4   | 2.5   | 462.7  | 8.7   | 3.5   |
| 561.4  | 0.1   | 0.2   | 541.5  | 0.3   | 0.6   |
| 566.9  | 8.3   | 0.2   | 559.9  | 4.0   | 0.4   |
| 572.8  | 8.3   | 1.4   | 559.9  | 0.5   | 0.5   |
| 574.7  | 2.8   | 0.3   | 562.4  | 5.7   | 0.2   |
| 591.1  | 22.1  | 0.3   | 573.0  | 20.2  | 0.2   |
| 598.8  | 23.8  | 1.6   | 597.9  | 70.3  | 2.3   |
| 606.9  | 28.8  | 2.3   | 599.8  | 1.0   | 1.1   |
| 640.4  | 7.2   | 8.7   | 622.1  | 5.1   | 9.1   |
| 660.0  | 11.3  | 2.3   | 639.6  | 3.5   | 0.1   |
| 661.0  | 8.4   | 1.5   | 643.5  | 11.3  | 3.4   |
| 749.6  | 1.0   | 0.2   | 718.9  | 1.9   | 0.3   |
| 759.8  | 28.9  | 0.1   | 735.5  | 126.1 | 0.2   |
| 773.5  | 92.7  | 0.0   | 747.1  | 4.5   | 0.6   |
| 780.0  | 1.8   | 16.4  | 768.8  | 1.0   | 13.9  |
| 828.8  | 0.0   | 1.4   | 800.1  | 0.0   | 1.7   |
| 895.1  | 0.0   | 0.3   | 856.6  | 0.0   | 0.2   |
| 904.7  | 0.1   | 0.5   | 865.3  | 0.5   | 0.2   |
| 979.5  | 187.9 | 66.5  | 945.0  | 0.1   | 0.4   |
| 992.0  | 0.1   | 0.4   | 948.6  | 200.6 | 67.8  |
| 998.8  | 0.1   | 0.2   | 955.8  | 0.2   | 0.1   |
| 1012.4 | 0.0   | 0.9   | 968.0  | 0.1   | 0.4   |
| 1016.5 | 0.1   | 0.5   | 981.4  | 0.5   | 0.6   |
| 1027.6 | 4.9   | 4.5   | 1009.1 | 4.1   | 2.6   |
| 1034.5 | 21.0  | 115.8 | 1018.8 | 16.9  | 82.4  |
| 1053.7 | 2.5   | 4.9   | 1039.6 | 1.0   | 10.5  |
| 1082.0 | 9.4   | 46.7  | 1057.9 | 5.4   | 48.4  |
| 1094.5 | 3.8   | 1.1   | 1060.5 | 9.3   | 15.7  |
| 1129.2 | 9.9   | 1.6   | 1099.1 | 12.4  | 3.1   |
| 1142.8 | 0.5   | 0.4   | 1113.9 | 0.2   | 0.6   |
| 1177.8 | 8.5   | 10.7  | 1127.7 | 3.1   | 7.2   |
| 1192.8 | 7.2   | 3.2   | 1140.0 | 5.9   | 5.8   |
| 1304.1 | 7.7   | 12.7  | 1253.8 | 2.6   | 12.2  |
| 1308.0 | 2.9   | 21.5  | 1269.8 | 4.7   | 7.8   |
| 1318.8 | 1.4   | 199.9 | 1320.6 | 1.9   | 203.8 |
| 1343.4 | 10.8  | 43.8  | 1383.7 | 2.6   | 8.2   |
| 1346.2 | 12.6  | 36.9  | 1390.8 | 95.2  | 34.3  |
| 1377.4 | 312.8 | 12.6  | 1397.0 | 58.8  | 14.2  |
| 1400.2 | 318.1 | 24.8  | 1398.1 | 33.7  | 9.6   |
| 1413.9 | 182.9 | 26.3  | 1418.7 | 2.5   | 42.8  |
| 1459.8 | 9.6   | 25.9  | 1434.0 | 205.7 | 51.1  |

|        |        |       |        |       |       |
|--------|--------|-------|--------|-------|-------|
| 1473.6 | 69.0   | 0.7   | 1444.8 | 84.6  | 0.8   |
| 1507.3 | 40.6   | 2.5   | 1458.1 | 42.5  | 1.7   |
| 1526.7 | 8.3    | 168.5 | 1507.5 | 2.3   | 174.2 |
| 1616.1 | 15.3   | 137.5 | 1600.3 | 7.1   | 147.8 |
| 1630.2 | 16.1   | 1.9   | 1617.7 | 14.4  | 0.9   |
| 1646.2 | 31.5   | 341.1 | 1635.6 | 21.6  | 333.4 |
| 1657.8 | 25.9   | 12.0  | 1646.2 | 21.5  | 12.1  |
| 2178.9 | 1761.4 | 52.6  | 2196.7 | 688.2 | 38.7  |
| 2187.2 | 996.5  | 221.9 | 2203.0 | 950.4 | 76.6  |
| 2223.5 | 979.0  | 468.4 | 2243.6 | 939.7 | 414.1 |
| 3213.0 | 4.8    | 50.9  | 3101.1 | 17.4  | 31.7  |
| 3216.6 | 4.1    | 101.7 | 3106.4 | 5.7   | 40.5  |
| 3218.9 | 0.4    | 64.7  | 3138.6 | 0.6   | 100.5 |
| 3226.9 | 2.6    | 33.6  | 3139.9 | 0.2   | 46.8  |
| 3239.2 | 2.8    | 94.1  | 3154.3 | 0.1   | 7.2   |
| 3241.9 | 1.9    | 280.3 | 3157.0 | 0.0   | 110.9 |
| 3244.6 | 0.1    | 9.5   | 3160.8 | 0.7   | 97.1  |
| 3256.3 | 3.3    | 172.1 | 3161.4 | 0.2   | 413.3 |

**[NbO(N<sub>3</sub>)<sub>3</sub>·CH<sub>3</sub>CN]**

| <b>B3LYP [5(A)]</b> |       |       | <b>SVWN5 [5(B)]</b> |       |       |
|---------------------|-------|-------|---------------------|-------|-------|
| Freq                | IR    | Raman | Freq                | IR    | Raman |
| 13.2                | 0.4   | 0.3   | 18.3                | 0.7   | 10.8  |
| 23.0                | 1.0   | 0.8   | 26.7                | 1.5   | 4.4   |
| 26.3                | 0.9   | 17.1  | 34.7                | 0.2   | 11.6  |
| 29.1                | 3.4   | 4.2   | 39.4                | 2.8   | 1.7   |
| 33.0                | 0.0   | 13.1  | 57.1                | 0.0   | 1.8   |
| 45.3                | 1.3   | 3.5   | 66.2                | 2.4   | 8.3   |
| 65.7                | 0.5   | 9.1   | 68.8                | 1.5   | 7.8   |
| 79.2                | 2.1   | 10.7  | 77.0                | 5.6   | 11.9  |
| 98.9                | 2.3   | 3.4   | 113.8               | 1.3   | 1.0   |
| 107.9               | 0.9   | 0.9   | 140.1               | 0.3   | 8.5   |
| 176.8               | 5.6   | 0.9   | 189.7               | 2.3   | 6.6   |
| 178.8               | 2.9   | 3.0   | 195.7               | 1.5   | 2.9   |
| 189.4               | 2.6   | 9.9   | 224.6               | 0.1   | 1.3   |
| 226.1               | 4.2   | 5.6   | 228.9               | 3.0   | 4.7   |
| 228.9               | 0.1   | 0.1   | 238.9               | 1.6   | 2.7   |
| 260.8               | 1.9   | 2.5   | 259.8               | 2.1   | 1.0   |
| 278.7               | 16.9  | 5.8   | 265.9               | 7.7   | 1.4   |
| 418.5               | 51.3  | 25.1  | 413.4               | 5.2   | 2.3   |
| 422.7               | 3.5   | 3.1   | 415.5               | 6.3   | 8.2   |
| 425.0               | 0.7   | 1.0   | 431.2               | 26.5  | 38.6  |
| 448.2               | 207.9 | 33.9  | 445.5               | 182.0 | 16.0  |

|        |        |       |        |        |       |
|--------|--------|-------|--------|--------|-------|
| 458.3  | 256.9  | 0.5   | 472.1  | 161.5  | 0.7   |
| 562.9  | 6.3    | 0.5   | 552.5  | 10.5   | 1.0   |
| 567.7  | 8.3    | 0.9   | 554.8  | 7.7    | 0.3   |
| 568.1  | 13.3   | 0.2   | 558.3  | 8.5    | 0.7   |
| 580.3  | 25.8   | 1.5   | 562.9  | 5.4    | 0.7   |
| 588.0  | 51.5   | 2.7   | 579.0  | 53.8   | 2.9   |
| 591.8  | 29.7   | 2.3   | 594.3  | 38.7   | 3.1   |
| 945.1  | 8.9    | 8.5   | 980.4  | 11.5   | 3.7   |
| 999.2  | 165.4  | 45.6  | 980.9  | 64.3   | 55.0  |
| 1053.8 | 4.8    | 0.1   | 987.1  | 83.3   | 17.4  |
| 1054.0 | 2.0    | 0.1   | 989.8  | 9.7    | 0.2   |
| 1400.6 | 470.0  | 19.0  | 1317.1 | 37.8   | 15.5  |
| 1403.2 | 63.8   | 13.9  | 1370.8 | 24.4   | 12.4  |
| 1407.3 | 351.5  | 12.7  | 1379.2 | 16.8   | 7.1   |
| 1428.2 | 177.9  | 9.2   | 1401.8 | 112.5  | 28.3  |
| 1462.2 | 13.4   | 8.0   | 1422.8 | 183.3  | 24.6  |
| 1462.8 | 13.7   | 7.1   | 1466.0 | 244.7  | 29.2  |
| 2202.4 | 1725.8 | 114.4 | 2216.9 | 977.9  | 88.1  |
| 2208.0 | 1762.8 | 133.2 | 2231.3 | 1326.0 | 137.0 |
| 2233.9 | 216.7  | 639.5 | 2255.5 | 555.3  | 603.8 |
| 2396.3 | 82.7   | 207.6 | 2336.3 | 105.1  | 268.1 |
| 3079.6 | 0.4    | 209.2 | 2994.7 | 7.6    | 279.4 |
| 3168.0 | 0.0    | 63.6  | 3090.9 | 4.8    | 60.6  |
| 3169.4 | 0.1    | 51.7  | 3095.1 | 4.1    | 80.7  |

**[NbO(N<sub>3</sub>)<sub>3</sub>·2CH<sub>3</sub>CN] [6(A)], C<sub>1</sub>**

| B3LYP |     |       | SVWN5 |     |       |
|-------|-----|-------|-------|-----|-------|
| Freq  | IR  | Raman | Freq  | IR  | Raman |
| 19.9  | 3.0 | 7.9   | 22.9  | 0.9 | 15.8  |
| 20.8  | 0.2 | 6.9   | 24.7  | 0.2 | 8.2   |
| 23.2  | 0.1 | 0.0   | 33.2  | 1.0 | 11.0  |
| 30.5  | 2.4 | 1.5   | 36.3  | 1.8 | 2.8   |
| 31.5  | 0.9 | 10.4  | 43.4  | 2.4 | 2.2   |
| 32.6  | 3.6 | 4.1   | 65.4  | 0.5 | 3.9   |
| 32.8  | 1.9 | 1.0   | 70.8  | 0.2 | 1.6   |
| 34.9  | 1.0 | 5.6   | 74.6  | 0.3 | 0.9   |
| 58.2  | 1.3 | 16.5  | 87.9  | 8.9 | 0.2   |
| 81.1  | 0.4 | 9.3   | 92.4  | 6.0 | 4.9   |
| 82.7  | 1.8 | 0.8   | 116.9 | 3.1 | 8.7   |
| 113.3 | 0.0 | 3.8   | 125.0 | 9.6 | 4.7   |
| 117.9 | 6.3 | 1.0   | 148.6 | 0.8 | 6.8   |
| 136.4 | 0.1 | 2.1   | 159.8 | 0.9 | 2.0   |

|        |        |       |        |        |       |
|--------|--------|-------|--------|--------|-------|
| 148.7  | 2.8    | 3.4   | 180.4  | 0.4    | 5.0   |
| 173.8  | 0.0    | 1.7   | 184.1  | 2.0    | 1.1   |
| 188.3  | 4.2    | 1.5   | 199.4  | 7.0    | 4.7   |
| 214.2  | 5.3    | 0.5   | 217.3  | 0.9    | 3.2   |
| 218.3  | 9.0    | 3.5   | 220.1  | 2.5    | 1.6   |
| 222.4  | 10.9   | 4.5   | 224.5  | 4.3    | 3.6   |
| 235.9  | 0.3    | 1.0   | 235.5  | 5.0    | 1.8   |
| 246.1  | 6.4    | 1.2   | 248.4  | 10.0   | 1.1   |
| 273.8  | 38.3   | 9.0   | 271.9  | 15.0   | 2.1   |
| 395.2  | 63.7   | 11.6  | 382.5  | 1.8    | 1.1   |
| 398.5  | 2.7    | 2.6   | 390.8  | 0.5    | 1.8   |
| 404.8  | 1.1    | 0.6   | 404.8  | 10.4   | 1.9   |
| 413.3  | 2.1    | 3.3   | 407.7  | 4.7    | 6.9   |
| 421.5  | 0.6    | 3.1   | 427.2  | 8.9    | 18.3  |
| 438.1  | 254.5  | 0.7   | 436.3  | 193.5  | 29.6  |
| 439.4  | 185.8  | 37.5  | 451.6  | 179.3  | 2.5   |
| 567.4  | 8.7    | 0.3   | 559.3  | 4.2    | 0.9   |
| 577.1  | 14.4   | 0.2   | 561.3  | 6.9    | 0.3   |
| 578.8  | 1.1    | 0.2   | 561.7  | 19.8   | 0.8   |
| 593.2  | 34.6   | 1.1   | 568.4  | 6.9    | 0.3   |
| 605.4  | 3.2    | 2.0   | 597.0  | 37.9   | 3.1   |
| 605.5  | 54.6   | 0.4   | 598.6  | 35.4   | 1.0   |
| 942.0  | 14.5   | 7.0   | 966.4  | 105.1  | 73.9  |
| 948.7  | 10.4   | 11.6  | 975.6  | 81.8   | 34.2  |
| 998.1  | 240.7  | 68.1  | 980.8  | 10.1   | 1.4   |
| 1052.8 | 4.4    | 0.4   | 983.0  | 5.0    | 2.0   |
| 1054.3 | 3.5    | 0.1   | 983.2  | 38.8   | 3.2   |
| 1054.6 | 1.8    | 0.4   | 991.6  | 4.4    | 0.6   |
| 1055.0 | 3.3    | 0.2   | 994.3  | 4.4    | 0.2   |
| 1393.2 | 274.7  | 23.3  | 1314.0 | 42.8   | 9.2   |
| 1396.7 | 407.7  | 15.0  | 1314.6 | 41.0   | 12.8  |
| 1403.1 | 14.6   | 8.7   | 1371.3 | 27.1   | 16.3  |
| 1403.8 | 1.0    | 17.6  | 1374.0 | 18.0   | 11.7  |
| 1412.4 | 91.0   | 15.4  | 1382.6 | 15.9   | 7.2   |
| 1463.2 | 13.3   | 8.9   | 1385.5 | 15.8   | 5.6   |
| 1463.5 | 12.1   | 3.9   | 1398.2 | 79.3   | 24.0  |
| 1464.4 | 13.4   | 10.2  | 1407.1 | 66.3   | 30.8  |
| 1465.2 | 14.8   | 6.6   | 1454.9 | 220.8  | 29.7  |
| 2179.7 | 1253.1 | 88.0  | 2205.7 | 935.7  | 75.9  |
| 2187.5 | 1808.1 | 79.9  | 2214.7 | 1082.9 | 84.0  |
| 2219.6 | 563.9  | 499.5 | 2248.5 | 780.7  | 504.5 |
| 2389.8 | 73.7   | 141.1 | 2326.4 | 84.9   | 203.9 |

|        |      |       |        |      |       |
|--------|------|-------|--------|------|-------|
| 2402.6 | 74.7 | 303.3 | 2338.6 | 94.0 | 301.4 |
| 3078.8 | 0.1  | 231.1 | 2992.7 | 2.5  | 208.1 |
| 3079.4 | 0.0  | 185.4 | 2993.0 | 3.6  | 328.8 |
| 3166.7 | 0.0  | 51.8  | 3087.3 | 3.6  | 53.0  |
| 3166.9 | 0.1  | 73.5  | 3088.3 | 4.5  | 67.2  |
| 3167.6 | 0.0  | 53.5  | 3095.3 | 2.5  | 81.6  |
| 3169.0 | 0.0  | 48.0  | 3096.4 | 1.6  | 71.6  |

Figure S7:  $[\text{NbO}(\text{N}_3)_3 \cdot 2\text{CH}_3\text{CN}]$  structures.

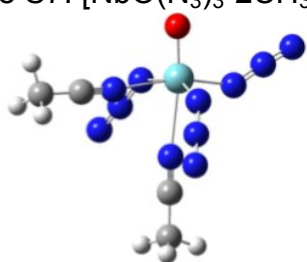

**6(A)**  $[\text{NbO}(\text{N}_3)_3 \cdot 2\text{CH}_3\text{CN}]$   
B3LYP: 0.0 kcal/mol

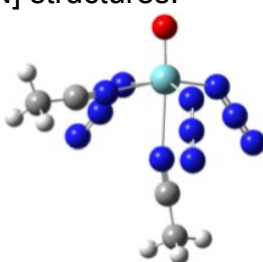

**6(B)**  $[\text{NbO}(\text{N}_3)_3 \cdot 2\text{CH}_3\text{CN}]$   
B3LYP: 0.5 kcal/mol

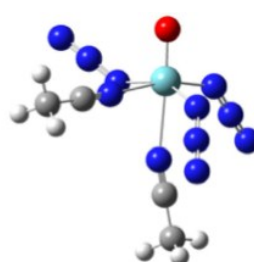

**6(C)**  $[\text{NbO}(\text{N}_3)_3 \cdot 2\text{CH}_3\text{CN}]$   
B3LYP: 1.0 kcal/mol

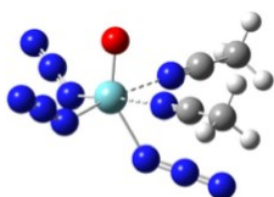

**6(D)**  $[\text{NbO}(\text{N}_3)_3 \cdot 2\text{CH}_3\text{CN}]$   
B3LYP: 6.8 kcal/mol

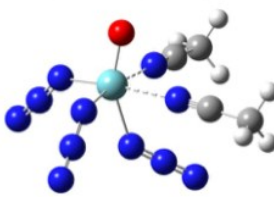

**6(E)**  $[\text{NbO}(\text{N}_3)_3 \cdot 2\text{CH}_3\text{CN}]$   
B3LYP: 7.6 kcal/mol

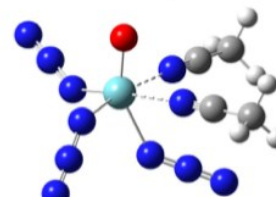

**6(F)**  $[\text{NbO}(\text{N}_3)_3 \cdot 2\text{CH}_3\text{CN}]$   
B3LYP: 8.6 kcal/mol

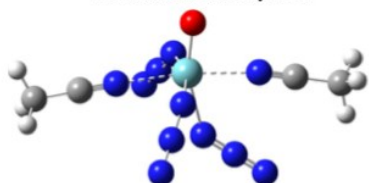

**6(G)**  $[\text{NbO}(\text{N}_3)_3 \cdot 2\text{CH}_3\text{CN}]$   
B3LYP: 12.3 kcal/mol

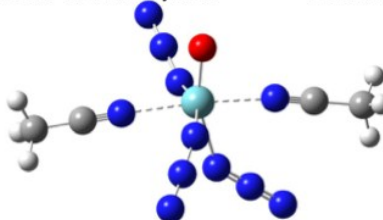

**6(H)**  $[\text{NbO}(\text{N}_3)_3 \cdot 2\text{CH}_3\text{CN}]$   
B3LYP: 13.0 kcal/mol

Figure S8: Optimized structure of  $[\text{NbO}(\text{N}_3)_3]$ .

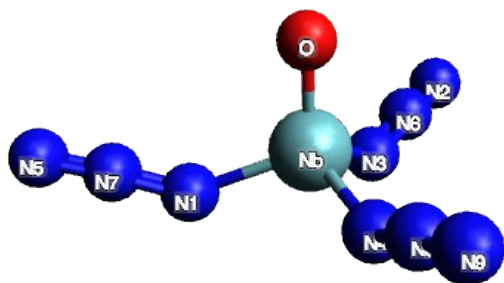

Cartesian Coordinates

B3LYP/DZVP2/cc-pVDZ-PP

0 1

|    |           |           |           |
|----|-----------|-----------|-----------|
| O  | 1.529210  | -0.907016 | 0.000000  |
| N  | -0.988581 | -0.506603 | 1.629625  |
| N  | 2.151648  | 3.583352  | 0.000000  |
| N  | 0.453292  | 1.920318  | 0.000000  |
| N  | -0.988581 | -0.506603 | -1.629625 |
| N  | -1.056484 | -1.805988 | 3.618757  |
| N  | 1.358448  | 2.752545  | 0.000000  |
| N  | -0.988581 | -1.193373 | 2.649467  |
| N  | -0.988581 | -1.193373 | -2.649467 |
| N  | -1.056484 | -1.805988 | -3.618757 |
| NB | 0.060821  | -0.035460 | 0.000000  |

SVWN5/DZVP2/cc-pVDZ-PP

0 1

|    |           |           |           |
|----|-----------|-----------|-----------|
| O  | 1.739006  | -0.521515 | 0.000000  |
| N  | -0.774598 | -0.739152 | 1.612718  |
| N  | 1.128928  | 4.046344  | 0.000000  |
| N  | 0.031354  | 1.936099  | 0.000000  |
| N  | -0.774598 | -0.739152 | -1.612718 |
| N  | -0.706251 | -1.982058 | 3.639464  |
| N  | 0.625509  | 3.003636  | 0.000000  |
| N  | -0.706251 | -1.384030 | 2.647944  |
| N  | -0.706251 | -1.384030 | -2.647944 |
| N  | -0.706251 | -1.982058 | -3.639464 |
| NB | 0.102605  | -0.030660 | 0.000000  |

Figure S9: Optimized structure of [(bipy)NbO(N<sub>3</sub>)<sub>3</sub>] 2(A).

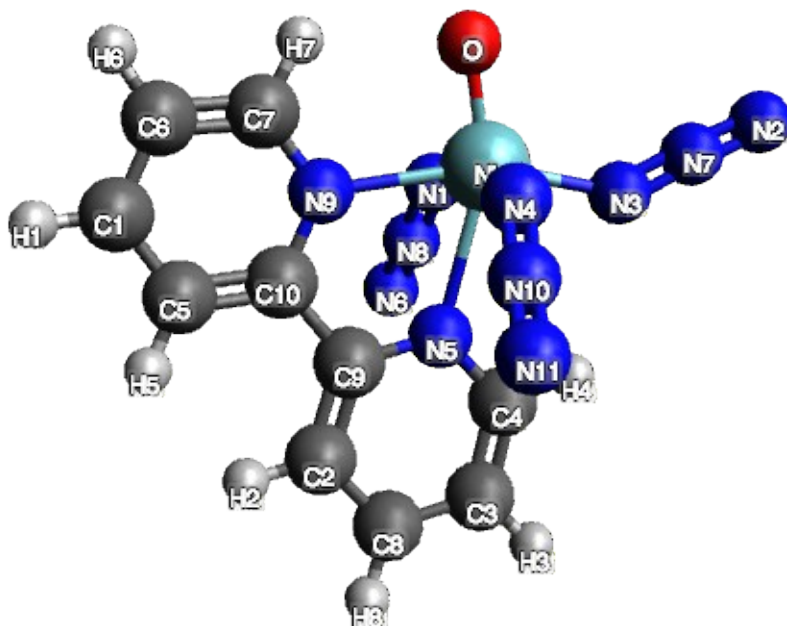

Cartesian Coordinates

B3LYP/DZVP2/cc-pVDZ-PP

0 1

|   |           |           |           |
|---|-----------|-----------|-----------|
| O | 0.088444  | -2.816050 | 0.000000  |
| N | 0.435895  | -0.813943 | 2.040927  |
| N | 4.607390  | -2.389662 | 0.000000  |
| N | 2.627629  | -1.078563 | 0.000000  |
| N | 0.435895  | -0.813943 | -2.040927 |
| N | 0.310048  | 1.272589  | 0.000000  |
| N | 0.424623  | 0.995100  | 3.581879  |
| N | 3.628244  | -1.780548 | 0.000000  |
| N | 0.435895  | 0.131962  | 2.808258  |
| N | -1.680914 | -0.501111 | 0.000000  |
| C | -4.379647 | 0.185119  | 0.000000  |
| H | -5.430147 | 0.458954  | 0.000000  |
| C | -1.141223 | 3.178886  | 0.000000  |
| H | -2.141255 | 3.593174  | 0.000000  |
| C | 1.247710  | 3.482058  | 0.000000  |
| H | 2.133505  | 4.107291  | 0.000000  |
| C | 1.371585  | 2.092295  | 0.000000  |
| H | 2.344707  | 1.609746  | 0.000000  |
| N | 0.435895  | 0.131962  | -2.808258 |
| C | -3.394811 | 1.174315  | 0.000000  |
| H | -3.680850 | 2.218241  | 0.000000  |
| C | -3.990769 | -1.156543 | 0.000000  |
| H | -4.718852 | -1.959931 | 0.000000  |
| N | 0.424623  | 0.995100  | -3.581879 |
| C | -2.628011 | -1.453705 | 0.000000  |
| H | -2.263813 | -2.475911 | 0.000000  |
| C | -0.036514 | 4.032453  | 0.000000  |
| H | -0.177237 | 5.108768  | 0.000000  |



|    |           |           |          |
|----|-----------|-----------|----------|
| C  | -0.935101 | 1.793972  | 0.000000 |
| C  | -2.045060 | 0.802742  | 0.000000 |
| NB | 0.590753  | -1.169856 | 0.000000 |

SVWN5/DZVP2/cc-pVDZ-PP

0 1

|    |           |           |           |
|----|-----------|-----------|-----------|
| O  | -1.322380 | -2.458033 | 0.000000  |
| N  | 0.012698  | -0.856301 | 1.993583  |
| N  | 3.066154  | -4.321248 | 0.000000  |
| N  | 1.741297  | -2.348025 | 0.000000  |
| N  | 0.012698  | -0.856301 | -1.993583 |
| N  | 0.993322  | 0.790421  | 0.000000  |
| N  | -0.000598 | 1.201010  | 3.194098  |
| N  | 2.398545  | -3.370474 | 0.000000  |
| N  | 0.012698  | 0.196965  | 2.597492  |
| N  | -1.569673 | 0.310887  | 0.000000  |
| C  | -3.538683 | 2.267354  | 0.000000  |
| H  | -4.315992 | 3.040466  | 0.000000  |
| C  | 0.767415  | 3.169774  | 0.000000  |
| H  | 0.119863  | 4.052669  | 0.000000  |
| C  | 2.947642  | 2.161548  | 0.000000  |
| H  | 4.040873  | 2.226328  | 0.000000  |
| C  | 2.324557  | 0.918714  | 0.000000  |
| H  | 2.892199  | -0.023320 | 0.000000  |
| N  | 0.012698  | 0.196965  | -2.597492 |
| C  | -2.194343 | 2.620832  | 0.000000  |
| H  | -1.894742 | 3.673873  | 0.000000  |
| C  | -3.880522 | 0.914549  | 0.000000  |
| H  | -4.926150 | 0.588806  | 0.000000  |
| N  | -0.000598 | 1.201010  | -3.194098 |
| C  | -2.864483 | -0.033821 | 0.000000  |
| H  | -3.047806 | -1.119055 | 0.000000  |
| C  | 2.150074  | 3.307698  | 0.000000  |
| H  | 2.607629  | 4.303827  | 0.000000  |
| C  | 0.216504  | 1.887805  | 0.000000  |
| C  | -1.226581 | 1.616589  | 0.000000  |
| NB | 0.003390  | -1.343413 | 0.000000  |

Figure S10: Optimized structure of [(bipy)NbO(N<sub>3</sub>)<sub>3</sub>] 2(B).

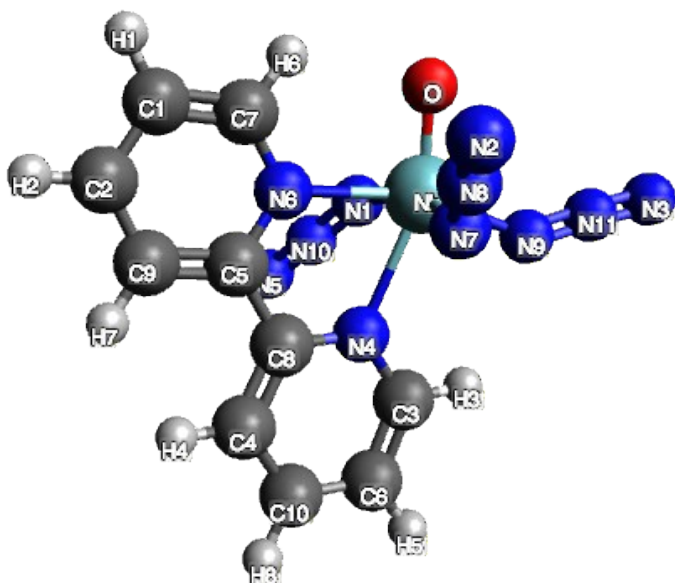

Cartesian Coordinates

B3LYP/DZVP2/cc-pVDZ-PP

0 1

|   |           |           |           |
|---|-----------|-----------|-----------|
| O | 1.489318  | -2.032161 | 0.866932  |
| N | 0.599017  | 0.441533  | 2.097792  |
| N | 0.630200  | -2.966087 | -2.935034 |
| N | 5.176453  | 0.536532  | 0.173300  |
| N | -0.357277 | 1.343749  | -0.518910 |
| N | -0.856648 | 2.073170  | 3.027217  |
| N | -1.201824 | -1.038208 | 0.344462  |
| N | 0.855644  | -0.930119 | -1.726547 |
| N | 0.745870  | -1.997589 | -2.314594 |
| N | 2.807954  | 0.603476  | 0.021799  |
| N | -0.152577 | 1.283404  | 2.551236  |
| N | 4.025138  | 0.538154  | 0.110292  |
| C | -2.882401 | -2.668213 | 0.879933  |
| H | -3.117154 | -3.656021 | 1.260232  |
| C | -3.881588 | -1.789942 | 0.454115  |
| H | -4.927817 | -2.076405 | 0.496215  |
| C | 0.157023  | 2.504720  | -0.946622 |
| H | 1.236623  | 2.600513  | -0.876613 |
| C | -2.551362 | 2.125510  | -1.073742 |
| H | -3.620418 | 1.961100  | -1.117302 |
| C | -2.161176 | -0.178693 | -0.073730 |
| C | -0.635246 | 3.533471  | -1.457951 |
| H | -0.178265 | 4.457751  | -1.793471 |
| C | -1.554167 | -2.248722 | 0.808888  |
| H | -0.735345 | -2.885849 | 1.127145  |
| C | -1.689582 | 1.141774  | -0.572530 |
| C | -3.515006 | -0.531920 | -0.026842 |
| H | -4.278276 | 0.161601  | -0.355332 |
| C | -2.017153 | 3.335009  | -1.521955 |

|    |           |           |           |
|----|-----------|-----------|-----------|
| H  | -2.669936 | 4.109318  | -1.912783 |
| NB | 1.094057  | -0.462653 | 0.282975  |

SVWN5/DZVP2/cc-pVDZ-PP

0 1

|    |           |           |           |
|----|-----------|-----------|-----------|
| O  | 1.293094  | -2.474205 | 0.000208  |
| N  | 0.715161  | -0.472152 | 1.994059  |
| N  | -0.984434 | 0.684949  | -3.195338 |
| N  | 5.294377  | 0.114830  | -0.000528 |
| N  | -0.099227 | 1.263448  | 0.000103  |
| N  | -0.985850 | 0.684544  | 3.195140  |
| N  | -1.138941 | -1.126338 | -0.000162 |
| N  | 0.715933  | -0.472031 | -1.993611 |
| N  | -0.150726 | 0.125807  | -2.598294 |
| N  | 2.917600  | 0.129140  | 0.000399  |
| N  | -0.151791 | 0.125553  | 2.598451  |
| N  | 4.132766  | 0.097301  | -0.000094 |
| C  | -2.932403 | -2.703167 | -0.000540 |
| H  | -3.248256 | -3.751827 | -0.000641 |
| C  | -3.861702 | -1.662279 | -0.000650 |
| H  | -4.937525 | -1.873409 | -0.000846 |
| C  | 0.541260  | 2.437445  | 0.000218  |
| H  | 1.639561  | 2.378447  | 0.000364  |
| C  | -2.195661 | 2.411098  | -0.000157 |
| H  | -3.289810 | 2.370590  | -0.000295 |
| C  | -2.028207 | -0.110784 | -0.000256 |
| C  | -0.138013 | 3.650511  | 0.000155  |
| H  | 0.421824  | 4.591752  | 0.000251  |
| C  | -1.577739 | -2.392212 | -0.000298 |
| H  | -0.780693 | -3.151248 | -0.000207 |
| C  | -1.443475 | 1.235984  | -0.000096 |
| C  | -3.402226 | -0.350280 | -0.000507 |
| H  | -4.107137 | 0.487446  | -0.000596 |
| C  | -1.534253 | 3.633230  | -0.000028 |
| H  | -2.102271 | 4.570786  | -0.000073 |
| NB | 1.113171  | -0.751501 | 0.000303  |

Figure S11: Optimized structure of  $[\text{NbO}(\text{N}_3)_4]^-$  3(A).

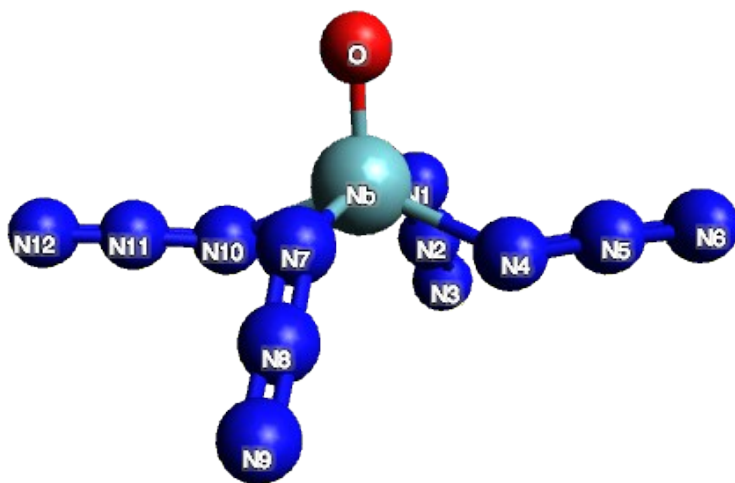

Cartesian Coordinates

B3LYP/DZVP2/cc-pVDZ-PP

-1 1

|    |           |           |           |
|----|-----------|-----------|-----------|
| O  | 0.000000  | 0.000000  | 2.218869  |
| N  | 0.000000  | 2.056570  | 0.152970  |
| N  | -0.092744 | 2.840803  | -0.770526 |
| N  | -0.183144 | 3.642683  | -1.606089 |
| N  | 1.933465  | -0.017709 | -0.292142 |
| N  | 3.008030  | 0.532650  | -0.153020 |
| N  | 4.059713  | 1.017232  | -0.069213 |
| N  | 0.000000  | -2.056570 | 0.152970  |
| N  | 0.092744  | -2.840803 | -0.770526 |
| N  | 0.183144  | -3.642683 | -1.606089 |
| N  | -1.933465 | 0.017709  | -0.292142 |
| N  | -3.008030 | -0.532650 | -0.153020 |
| N  | -4.059713 | -1.017232 | -0.069213 |
| NB | 0.000000  | 0.000000  | 0.501984  |

Figure S12: Optimized structure of  $[\text{NbO}(\text{N}_3)_4]^-$  3(B).

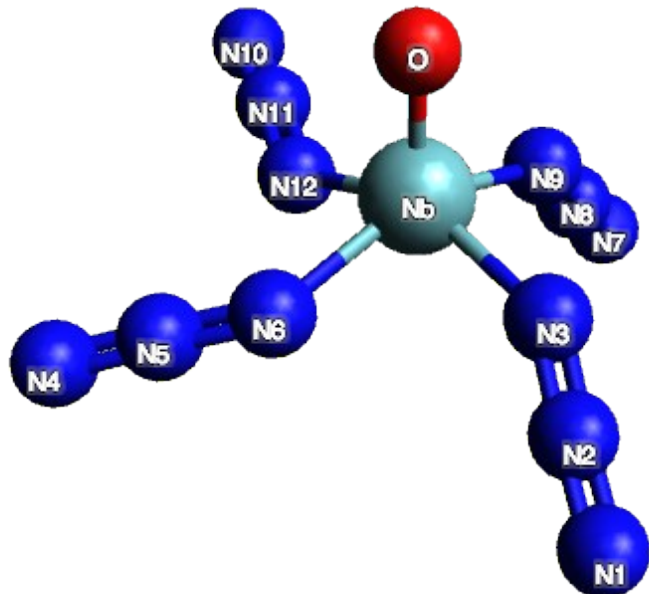

Cartesian Coordinates

B3LYP/DZVP2/cc-pVDZ-PP

-1 1

|    |           |           |           |
|----|-----------|-----------|-----------|
| O  | 0.193587  | 0.223218  | 2.209230  |
| N  | -4.006178 | -0.894279 | -0.890936 |
| N  | -3.025751 | -0.825245 | -0.271650 |
| N  | -2.031538 | -0.782880 | 0.422780  |
| N  | -0.361445 | 3.819218  | -1.198379 |
| N  | -0.621642 | 2.801407  | -0.705923 |
| N  | -0.957736 | 1.753224  | -0.191750 |
| N  | 1.332087  | -3.502852 | -1.424176 |
| N  | 0.999968  | -2.705430 | -0.647018 |
| N  | 0.663427  | -1.919786 | 0.215080  |
| N  | 3.963284  | 0.681377  | -0.206291 |
| N  | 2.806234  | 0.673592  | -0.294341 |
| N  | 1.600105  | 0.706191  | -0.451066 |
| NB | -0.099376 | -0.010183 | 0.532484  |

Figure S13: Optimized structure of  $[\text{NbO}(\text{N}_3)_4]^- 3(\text{C})$ .

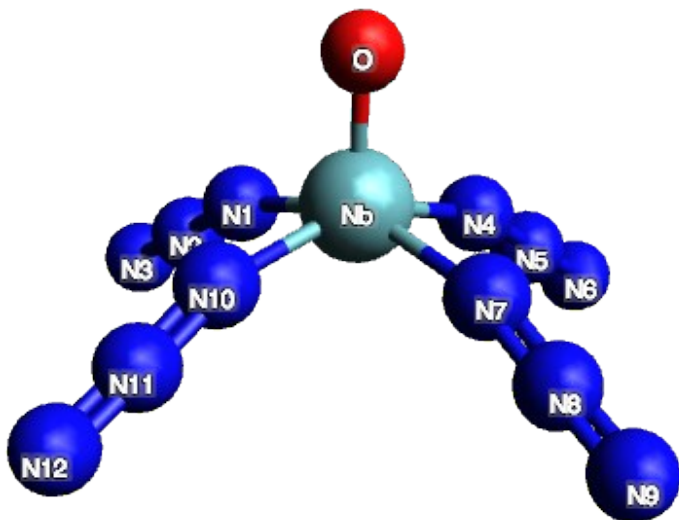

Cartesian Coordinates

SVWN5/DZVP2/cc-pVDZ-PP

-1 1

|    |           |           |           |
|----|-----------|-----------|-----------|
| O  | 0.000000  | 0.000000  | 2.327209  |
| N  | 1.976470  | -0.000001 | 0.116644  |
| N  | 2.990639  | 0.000001  | -0.533906 |
| N  | 3.997222  | 0.000003  | -1.133177 |
| N  | 0.000000  | -1.976471 | 0.116647  |
| N  | 0.000000  | -2.990628 | -0.533922 |
| N  | 0.000000  | -3.997201 | -1.133209 |
| N  | -1.976470 | 0.000001  | 0.116644  |
| N  | -2.990639 | -0.000001 | -0.533906 |
| N  | -3.997222 | -0.000003 | -1.133177 |
| N  | 0.000000  | 1.976471  | 0.116647  |
| N  | 0.000000  | 2.990628  | -0.533922 |
| N  | 0.000000  | 3.997201  | -1.133209 |
| NB | 0.000000  | 0.000000  | 0.604762  |

Figure S14: Optimized structure of  $[\text{NbO}(\text{N}_3)_5]^{2-}$  4(A).

Cartesian Coordinates

B3LYP/DZVP2/cc-pVDZ-PP

-2 1

|    |           |           |           |
|----|-----------|-----------|-----------|
| N  | 0.000064  | 0.079556  | -2.136984 |
| N  | 0.000080  | -0.640021 | -3.105888 |
| N  | 0.000080  | -1.272388 | -4.090991 |
| N  | -2.137043 | 0.079534  | 0.000000  |
| N  | -3.105921 | -0.640058 | 0.000000  |
| N  | -4.091013 | -1.272458 | 0.000000  |
| N  | 0.000064  | 0.079556  | 2.136984  |
| N  | 0.000080  | -0.640021 | 3.105888  |
| N  | 0.000080  | -1.272388 | 4.090991  |
| N  | 0.000536  | 2.150940  | 0.000000  |
| N  | 0.000042  | 3.345379  | 0.000000  |
| N  | -0.000404 | 4.524781  | 0.000000  |
| O  | -0.000245 | -1.834214 | 0.000000  |
| N  | 4.090684  | -1.273512 | 0.000000  |
| N  | 3.105751  | -0.640878 | 0.000000  |
| N  | 2.137037  | 0.078944  | 0.000000  |
| NB | 0.000028  | -0.100856 | 0.000000  |

SVWN5/DZVP2/cc-pVDZ-PP

-2 1

|    |           |           |           |
|----|-----------|-----------|-----------|
| N  | 0.001313  | -0.004637 | 2.086424  |
| N  | 0.002131  | -0.566229 | 3.149641  |
| N  | 0.002131  | -1.057835 | 4.220568  |
| N  | 2.093735  | 0.066821  | 0.000000  |
| N  | 3.163340  | -0.483791 | 0.000000  |
| N  | 4.240995  | -0.960161 | 0.000000  |
| N  | 0.001313  | -0.004637 | -2.086424 |
| N  | 0.002131  | -0.566229 | -3.149641 |
| N  | 0.002131  | -1.057835 | -4.220568 |
| N  | -0.043638 | 2.023017  | 0.000000  |
| N  | -0.074315 | 3.219391  | 0.000000  |
| N  | -0.105466 | 4.403355  | 0.000000  |
| O  | 0.079159  | -1.919874 | 0.000000  |
| N  | -4.227724 | -1.089003 | 0.000000  |
| N  | -3.148519 | -0.614674 | 0.000000  |
| N  | -2.074867 | -0.075933 | 0.000000  |
| NB | 0.012777  | -0.177131 | 0.000000  |

Figure S15: Optimized structure of  $[\text{NbO}(\text{N}_3)_5]^{2-}$  4(B).

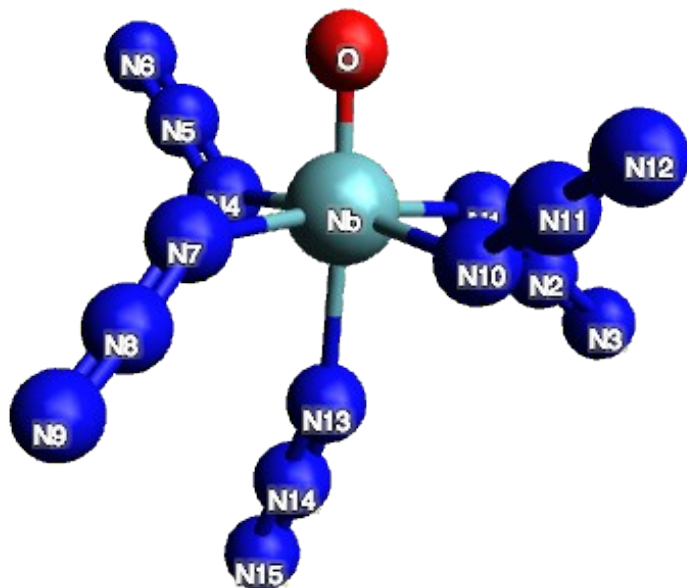

Cartesian Coordinates

B3LYP/DZVP2/cc-pVDZ-PP

-2 1

|    |           |           |           |
|----|-----------|-----------|-----------|
| O  | 0.387893  | 0.000018  | -2.173765 |
| N  | 0.130760  | -2.125654 | -0.293164 |
| N  | 0.195770  | -3.006794 | 0.528836  |
| N  | 0.262374  | -3.914997 | 1.262429  |
| N  | -2.038601 | -0.000104 | -0.724107 |
| N  | -2.785283 | -0.000096 | -1.673901 |
| N  | -3.569818 | 0.000023  | -2.542644 |
| N  | 0.130583  | 2.125622  | -0.293129 |
| N  | 0.195454  | 3.006755  | 0.528890  |
| N  | 0.261932  | 3.914880  | 1.262592  |
| N  | 2.149674  | 0.000059  | 0.175126  |
| N  | 3.246378  | 0.000183  | -0.326697 |
| N  | 4.339854  | 0.000403  | -0.746210 |
| N  | -0.450952 | -0.000062 | 1.735574  |
| N  | -1.193493 | -0.000085 | 2.678444  |
| N  | -1.898270 | -0.000057 | 3.620935  |
| NB | 0.099081  | -0.000017 | -0.462456 |

SVWN5/DZVP2/cc-pVDZ-PP

-2 1

|   |           |           |           |
|---|-----------|-----------|-----------|
| O | 0.174564  | -0.000859 | -2.222940 |
| N | 0.118542  | -2.076356 | -0.282098 |
| N | 0.265070  | -3.010059 | 0.462710  |
| N | 0.405216  | -3.966523 | 1.134780  |
| N | -2.047483 | -0.004648 | -0.575898 |
| N | -2.924505 | -0.007062 | -1.402974 |
| N | -3.830607 | -0.009459 | -2.155193 |
| N | 0.110289  | 2.076448  | -0.285021 |
| N | 0.252252  | 3.011610  | 0.458863  |



|    |           |           |           |
|----|-----------|-----------|-----------|
| N  | 0.387894  | 3.969461  | 1.129870  |
| N  | 2.105149  | 0.003837  | -0.040585 |
| N  | 3.246769  | 0.005604  | -0.413955 |
| N  | 4.383053  | 0.007403  | -0.728380 |
| N  | -0.348744 | 0.000585  | 1.684389  |
| N  | -1.014062 | 0.000644  | 2.684733  |
| N  | -1.648739 | 0.000691  | 3.681986  |
| NB | 0.058118  | -0.000204 | -0.480221 |

Figure S16. Optimized structure of  $[\text{NbO}(\text{N}_3)_5]^{2-} \cdot 4(\text{C})$ .

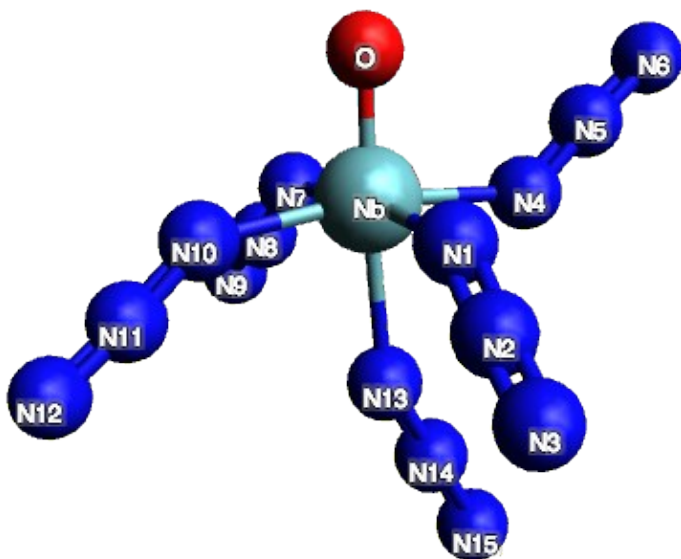

Cartesian Coordinates

B3LYP/DZVP2/cc-pVDZ-PP

-2 1

|    |           |           |           |
|----|-----------|-----------|-----------|
| O  | 0.965295  | -0.000354 | -2.193861 |
| N  | 0.120698  | 2.126680  | -0.503433 |
| N  | -0.278679 | 3.046483  | 0.166335  |
| N  | -0.635277 | 3.991035  | 0.757407  |
| N  | 2.086657  | -0.000270 | 0.415906  |
| N  | 3.244270  | -0.000466 | 0.068469  |
| N  | 4.386327  | -0.000638 | -0.186437 |
| N  | 0.120132  | -2.126850 | -0.503012 |
| N  | -0.279537 | -3.046415 | 0.166909  |
| N  | -0.636696 | -3.990747 | 0.757992  |
| N  | -1.815115 | 0.000087  | -1.309813 |
| N  | -2.969276 | 0.000285  | -0.961396 |
| N  | -4.109976 | 0.000538  | -0.700010 |
| N  | -0.626458 | 0.000217  | 1.484834  |
| N  | -0.515540 | 0.000362  | 2.681257  |
| N  | -0.438065 | 0.000744  | 3.855206  |
| NB | 0.212278  | -0.000109 | -0.628795 |

Figure S17: Optimized structure of  $[\text{NbO}(\text{N}_3)_5]^{2-} 4(\text{D})$

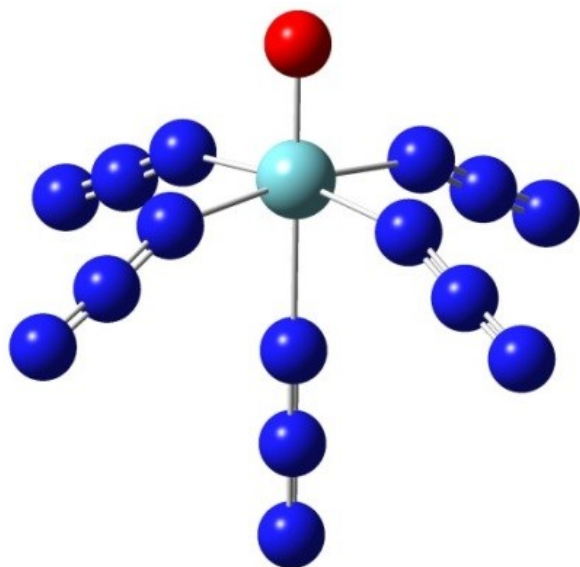

Cartesian Coordinates

B3LYP/DZVP2/cc-pVDZ-PP

-2 1

|    |           |           |           |
|----|-----------|-----------|-----------|
| O  | 0.000738  | 0.000040  | -2.596837 |
| N  | 1.763027  | 1.191228  | -0.708171 |
| N  | 2.541715  | 1.717744  | 0.046087  |
| N  | 3.339834  | 2.257047  | 0.710922  |
| N  | 1.191426  | -1.762543 | -0.707634 |
| N  | 1.717348  | -2.541517 | 0.046736  |
| N  | 2.256330  | -3.339753 | 0.711683  |
| N  | -1.762290 | -1.191264 | -0.708504 |
| N  | -2.541180 | -1.717633 | 0.045647  |
| N  | -3.339321 | -2.257116 | 0.710297  |
| N  | -1.190956 | 1.762638  | -0.708552 |
| N  | -1.718529 | 2.540701  | 0.045634  |
| N  | -2.259008 | 3.337772  | 0.710732  |
| N  | -0.000239 | 0.000293  | 1.411772  |
| N  | -0.000283 | 0.000783  | 2.611617  |
| N  | -0.000457 | 0.001199  | 3.788433  |
| NB | 0.000297  | 0.000064  | -0.860297 |

SVWN5/DZVP2/cc-pVDZ-PP

-2 1

|   |           |           |           |
|---|-----------|-----------|-----------|
| O | -0.004172 | -0.004168 | -2.526921 |
| N | -0.019612 | -2.076699 | -0.604273 |
| N | -0.032763 | -3.117037 | -0.005419 |
| N | -0.045837 | -4.169106 | 0.526222  |
| N | -2.075023 | 0.018559  | -0.602734 |
| N | -3.123438 | 0.037619  | -0.018933 |
| N | -4.182314 | 0.056007  | 0.499180  |
| N | 0.018777  | 2.073842  | -0.609107 |
| N | 0.031797  | 3.112660  | -0.007402 |
| N | 0.044676  | 4.163540  | 0.526465  |
| N | 2.074595  | -0.019818 | -0.611726 |

|    |           |           |           |
|----|-----------|-----------|-----------|
| N  | 3.121859  | -0.026692 | -0.025347 |
| N  | 4.180045  | -0.034254 | 0.494322  |
| N  | 0.004498  | 0.000731  | 1.432145  |
| N  | 0.005383  | -0.001383 | 2.632787  |
| N  | 0.006329  | -0.003325 | 3.815640  |
| NB | -0.000717 | -0.001687 | -0.777497 |

Figure S18: Optimized structure of  $[\text{NbO}(\text{N}_3)_3 \cdot \text{CH}_3\text{CN}]$  5(A).

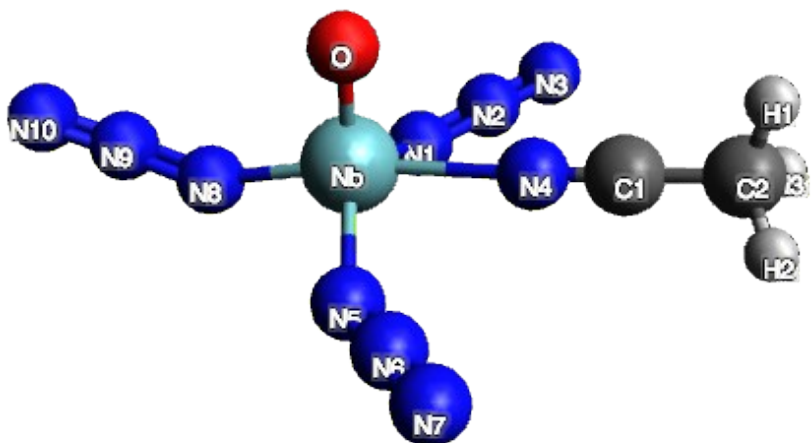

#### Cartesian Coordinates

B3LYP/DZVP2/cc-pVDZ-PP

0 1

|    |           |           |           |
|----|-----------|-----------|-----------|
| O  | -0.485255 | -0.000289 | 1.788178  |
| N  | -0.079939 | 1.828658  | -0.707361 |
| N  | 0.693896  | 2.764752  | -0.571752 |
| N  | 1.407075  | 3.669163  | -0.497237 |
| N  | 1.865214  | 0.000241  | 0.203149  |
| N  | -0.079267 | -1.828642 | -0.707723 |
| N  | 0.695626  | -2.763869 | -0.572008 |
| N  | 1.409805  | -3.667478 | -0.497376 |
| N  | -2.462618 | -0.000510 | -0.387771 |
| N  | -3.616312 | -0.000831 | 0.017356  |
| N  | -4.722792 | -0.001133 | 0.335891  |
| C  | 3.017920  | 0.000275  | 0.316261  |
| C  | 4.469554  | 0.000294  | 0.466042  |
| H  | 4.725322  | 0.000038  | 1.529071  |
| H  | 4.886846  | -0.892448 | -0.007260 |
| H  | 4.886747  | 0.893353  | -0.006743 |
| NB | -0.519916 | -0.000110 | 0.077549  |

Figure S19: Optimized structure of  $[\text{NbO}(\text{N}_3)_3 \cdot \text{CH}_3\text{CN}]$  5(B).

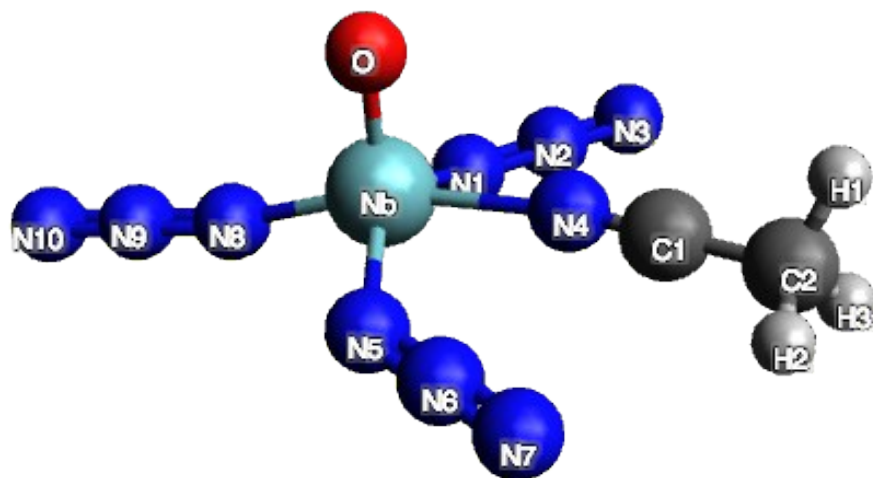

Cartesian Coordinates

SVWN5/DZVP2/cc-pVDZ-PP

0 1

|    |           |           |           |
|----|-----------|-----------|-----------|
| O  | -0.507448 | 0.045379  | 1.946012  |
| N  | -0.314057 | 1.874328  | -0.454549 |
| N  | 0.428733  | 2.837848  | -0.474218 |
| N  | 1.110962  | 3.777255  | -0.531494 |
| N  | 1.689842  | 0.163420  | 0.176695  |
| N  | 0.096237  | -1.836737 | -0.392149 |
| N  | 1.177955  | -2.379745 | -0.489666 |
| N  | 2.222315  | -2.886444 | -0.595704 |
| N  | -2.421256 | -0.259221 | -0.265695 |
| N  | -3.615099 | -0.464314 | -0.315987 |
| N  | -4.757734 | -0.657338 | -0.391652 |
| C  | 2.845520  | 0.009908  | 0.111993  |
| C  | 4.267082  | -0.185507 | 0.043822  |
| H  | 4.725349  | 0.057061  | 1.018520  |
| H  | 4.466694  | -1.243392 | -0.205084 |
| H  | 4.703151  | 0.466182  | -0.733083 |
| NB | -0.532598 | 0.005545  | 0.233112  |

Figure S20: Optimized structure of  $[\text{NbO}(\text{N}_3)_3 \cdot 2\text{CH}_3\text{CN}]$  6(A).

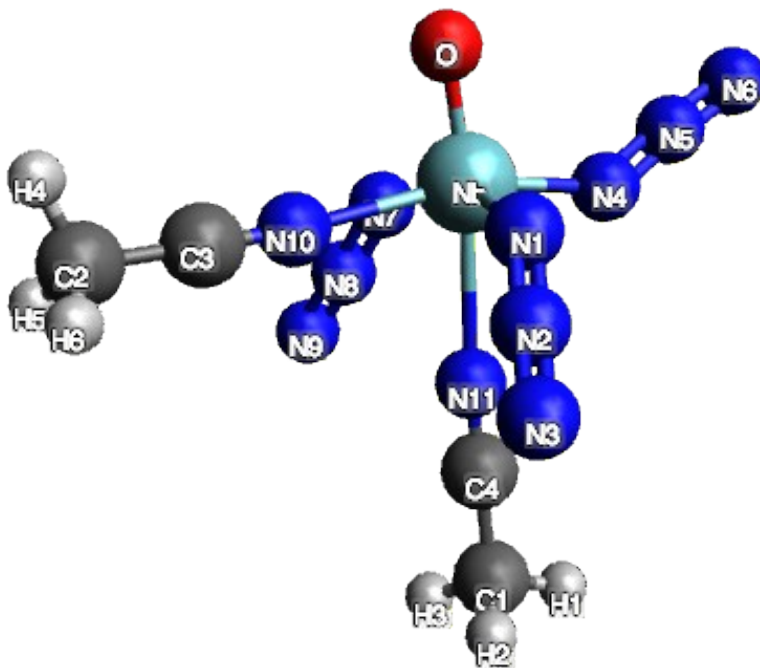

Cartesian Coordinates

B3LYP/DZVP2/cc-pVDZ-PP

0 1

|    |           |           |           |
|----|-----------|-----------|-----------|
| O  | 1.042181  | -2.322512 | -0.000242 |
| N  | 0.169394  | -0.404237 | -2.010771 |
| N  | -0.498530 | 0.364611  | -2.678858 |
| N  | -1.121685 | 1.064339  | -3.361072 |
| N  | 2.372418  | 0.283913  | -0.000031 |
| N  | 3.570765  | 0.039777  | 0.000013  |
| N  | 4.713197  | -0.116273 | 0.000050  |
| N  | 0.169512  | -0.404630 | 2.010695  |
| N  | -0.498396 | 0.364145  | 2.678886  |
| N  | -1.121540 | 1.063782  | 3.361205  |
| N  | -1.713635 | -1.201541 | -0.000053 |
| N  | -0.424894 | 1.669261  | 0.000162  |
| C  | -1.241222 | 4.157649  | 0.000315  |
| H  | -0.373359 | 4.822560  | 0.002244  |
| H  | -1.839552 | 4.348962  | -0.894334 |
| H  | -1.842645 | 4.347862  | 0.893124  |
| C  | -4.194375 | -2.033743 | -0.000010 |
| H  | -4.204309 | -3.127106 | -0.003168 |
| H  | -4.707533 | -1.670637 | 0.894446  |
| H  | -4.709310 | -1.665477 | -0.891331 |
| C  | -2.812778 | -1.563905 | -0.000033 |
| C  | -0.790044 | 2.769101  | 0.000236  |
| NB | 0.591550  | -0.671042 | -0.000090 |

Figure S21: Optimized structure of  $[\text{NbO}(\text{N}_3)_3 \cdot 2\text{CH}_3\text{CN}]$  6(B).

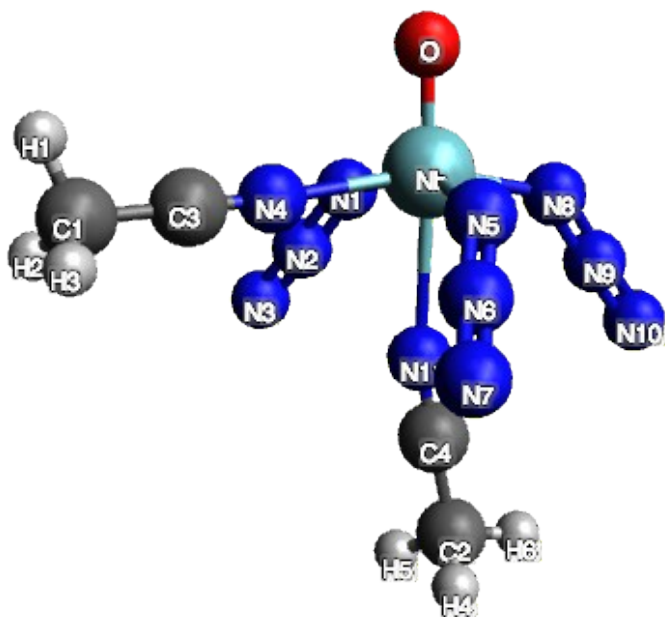

Cartesian Coordinates

B3LYP/DZVP2/cc-pVDZ-PP

0 1

|    |           |           |           |
|----|-----------|-----------|-----------|
| O  | -0.895996 | -2.629169 | -0.041336 |
| N  | -0.257706 | -0.644212 | 1.999189  |
| N  | -0.256781 | 0.363807  | 2.684207  |
| N  | -0.267236 | 1.288310  | 3.382454  |
| N  | -2.109159 | 0.128690  | 0.001062  |
| N  | -0.255001 | -0.580920 | -2.017520 |
| N  | -0.253414 | 0.447861  | -2.670862 |
| N  | -0.262916 | 1.393617  | -3.340078 |
| N  | 1.839607  | -1.601027 | -0.023114 |
| N  | 2.898662  | -0.996576 | -0.012737 |
| N  | 3.929654  | -0.471157 | -0.003499 |
| N  | 0.843242  | 1.283999  | 0.020674  |
| C  | -4.412920 | 1.367370  | 0.018957  |
| H  | -5.217630 | 0.627211  | 0.034157  |
| H  | -4.485545 | 1.999177  | 0.908229  |
| H  | -4.506581 | 1.985555  | -0.877886 |
| C  | 2.400464  | 3.390550  | 0.048164  |
| H  | 2.215561  | 3.999399  | -0.840680 |
| H  | 2.207075  | 3.982652  | 0.946510  |
| H  | 3.441965  | 3.057999  | 0.050091  |
| C  | -3.126340 | 0.680216  | 0.009070  |
| C  | 1.526405  | 2.221201  | 0.032926  |
| NB | -0.140371 | -1.094181 | -0.016655 |

Figure S22: Optimized structure of  $[\text{NbO}(\text{N}_3)_3 \cdot 2\text{CH}_3\text{CN}] 6(\text{C})$ .

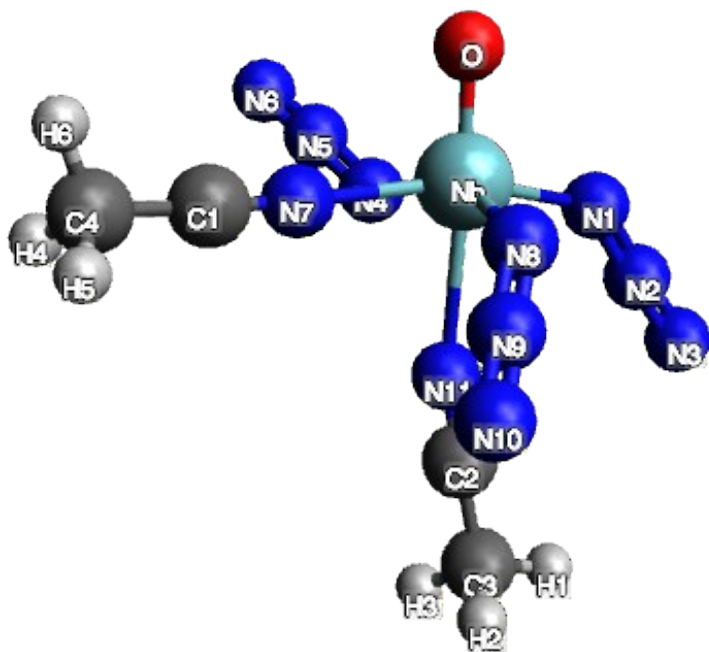

Cartesian Coordinates

B3LYP/DZVP2/cc-pVDZ-PP

0 1

|    |           |           |           |
|----|-----------|-----------|-----------|
| O  | -1.214613 | -1.321142 | -1.825103 |
| N  | 1.555295  | -1.587233 | -0.932888 |
| N  | 2.685299  | -1.519151 | -0.479118 |
| N  | 3.771598  | -1.495876 | -0.082096 |
| N  | -0.794896 | -1.542799 | 1.067825  |
| N  | -1.771617 | -2.206410 | 1.386533  |
| N  | -2.666560 | -2.832269 | 1.763615  |
| N  | -1.862480 | 0.875036  | 0.058118  |
| N  | 0.361779  | 1.154259  | -1.653521 |
| N  | 0.677628  | 2.291141  | -1.354270 |
| N  | 0.980875  | 3.385271  | -1.117067 |
| N  | 1.179770  | 0.624813  | 1.127402  |
| C  | -2.729551 | 1.580924  | 0.356221  |
| C  | 2.025081  | 1.101610  | 1.761864  |
| C  | 3.102484  | 1.689349  | 2.553415  |
| H  | 4.029850  | 1.145462  | 2.354734  |
| H  | 3.231831  | 2.738404  | 2.274658  |
| H  | 2.862507  | 1.619865  | 3.617659  |
| C  | -3.828677 | 2.466462  | 0.724858  |
| H  | -4.109118 | 2.292470  | 1.767115  |
| H  | -3.520301 | 3.507581  | 0.597534  |
| H  | -4.688319 | 2.262635  | 0.080588  |
| NB | -0.202985 | -0.586703 | -0.657594 |



Figure S23: Optimized structure of  $[\text{NbO}(\text{N}_3)_3 \cdot 2\text{CH}_3\text{CN}]$  6(D).

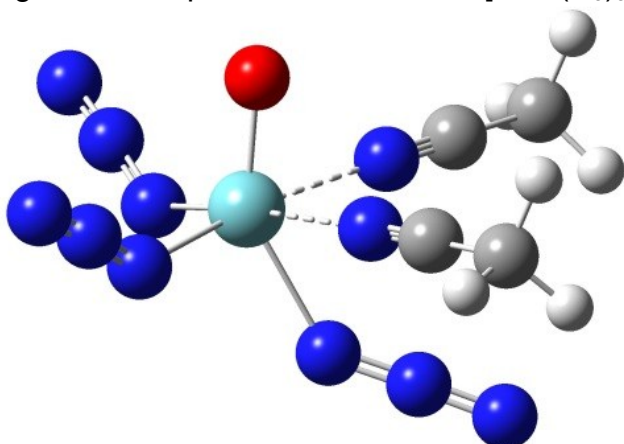

Cartesian Coordinates

B3LYP/DZVP2/cc-pVDZ-PP

0 1

|    |           |           |           |
|----|-----------|-----------|-----------|
| O  | -0.008103 | 0.763756  | -1.675536 |
| N  | 1.507492  | 1.742044  | 0.654781  |
| N  | 2.376765  | 2.447628  | 0.160448  |
| N  | 3.223960  | 3.124656  | -0.232336 |
| N  | 1.737447  | -1.028485 | -0.508168 |
| N  | -1.723389 | -1.054607 | -0.505066 |
| N  | -1.533521 | 1.718397  | 0.658296  |
| N  | -2.415376 | 2.410099  | 0.166716  |
| N  | -3.274388 | 3.073633  | -0.223441 |
| N  | 0.007995  | -0.824348 | 1.671396  |
| N  | 0.019790  | -2.028367 | 1.831645  |
| N  | 0.031218  | -3.177383 | 2.011130  |
| C  | 3.615718  | -2.775639 | -1.031471 |
| H  | 4.583300  | -2.370541 | -0.722941 |
| H  | 3.419919  | -3.699041 | -0.480102 |
| H  | 3.639332  | -2.987895 | -2.103588 |
| C  | -3.573576 | -2.829251 | -1.035829 |
| H  | -3.586187 | -3.045423 | -2.107350 |
| H  | -3.369173 | -3.748011 | -0.479848 |
| H  | -4.548985 | -2.436554 | -0.736032 |
| C  | -2.539664 | -1.840643 | -0.743144 |
| C  | 2.566032  | -1.802517 | -0.743061 |
| NB | -0.004644 | 0.557143  | 0.037985  |

Figure S24: Optimized structure of  $[\text{NbO}(\text{N}_3)_3 \cdot 2\text{CH}_3\text{CN}]$  6(E).

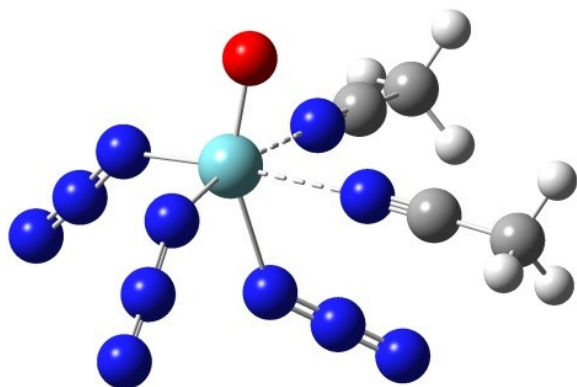

Cartesian Coordinates

B3LYP/DZVP2/cc-pVDZ-PP

0 1

|    |           |           |           |
|----|-----------|-----------|-----------|
| O  | 0.596149  | -0.228587 | -1.994473 |
| N  | 0.782683  | 1.853755  | -0.169613 |
| N  | 2.233963  | -0.724104 | 0.397879  |
| N  | 3.374042  | -0.701018 | -0.049307 |
| N  | 4.474160  | -0.689889 | -0.394242 |
| N  | -0.274904 | -2.389037 | -0.226758 |
| N  | -0.708022 | -3.163050 | 0.617920  |
| N  | -1.126171 | -3.947126 | 1.353212  |
| N  | -1.907332 | 0.112377  | -0.857481 |
| N  | -0.533608 | 0.108630  | 1.578272  |
| N  | -1.228650 | 1.014473  | 1.992215  |
| N  | -1.891364 | 1.877750  | 2.404414  |
| C  | 0.969109  | 2.988663  | -0.038218 |
| C  | -3.008095 | 0.377489  | -1.098948 |
| C  | 1.210237  | 4.417340  | 0.137030  |
| H  | 0.469134  | 4.830224  | 0.826471  |
| H  | 2.210892  | 4.569042  | 0.550897  |
| H  | 1.137851  | 4.926268  | -0.827774 |
| C  | -4.400356 | 0.699404  | -1.397861 |
| H  | -4.992881 | -0.219552 | -1.402780 |
| H  | -4.792265 | 1.375791  | -0.633728 |
| H  | -4.467892 | 1.176592  | -2.379088 |
| NB | 0.357976  | -0.468204 | -0.300385 |

Figure S25: Optimized structure of  $[\text{NbO}(\text{N}_3)_3 \cdot 2\text{CH}_3\text{CN}] 6(\text{F})$ .

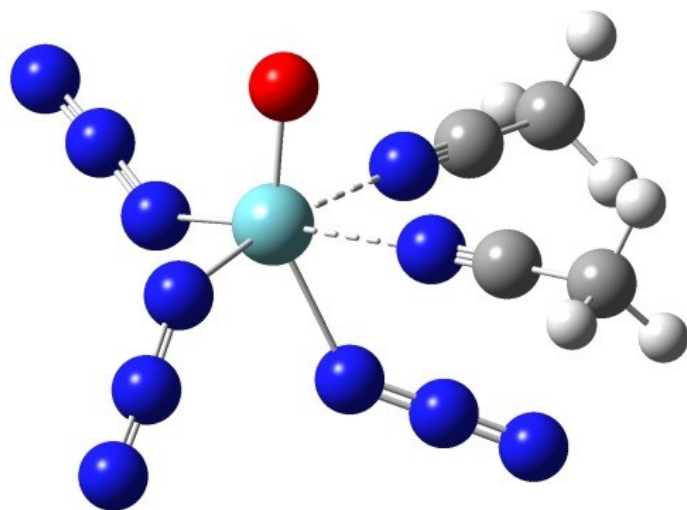

Cartesian Coordinates

B3LYP/DZVP2/cc-pVDZ-PP

0 1

|    |           |           |           |
|----|-----------|-----------|-----------|
| O  | 0.085649  | -0.000044 | -2.333875 |
| N  | 1.782250  | -1.556478 | -0.525182 |
| N  | 2.358367  | -2.185345 | 0.353850  |
| N  | 2.929280  | -2.827814 | 1.123099  |
| N  | -1.244772 | -1.584559 | -0.474493 |
| N  | -1.229875 | 1.596284  | -0.473848 |
| N  | 1.796730  | 1.539683  | -0.524451 |
| N  | 2.379001  | 2.163468  | 0.354093  |
| N  | 2.956171  | 2.800795  | 1.122962  |
| N  | 0.012406  | -0.000528 | 1.464949  |
| N  | -0.999109 | 0.003477  | 2.137569  |
| N  | -1.962717 | 0.007265  | 2.790701  |
| C  | -3.124679 | -3.372220 | -0.131630 |
| H  | -2.665983 | -4.358706 | -0.021489 |
| H  | -3.692964 | -3.136816 | 0.772056  |
| H  | -3.794677 | -3.380462 | -0.995423 |
| C  | -3.091943 | 3.402422  | -0.130431 |
| H  | -3.767614 | 3.410784  | -0.989792 |
| H  | -3.656200 | 3.177856  | 0.778518  |
| H  | -2.624042 | 4.385608  | -0.029929 |
| C  | -2.057520 | 2.391524  | -0.324623 |
| C  | -2.080272 | -2.371586 | -0.325499 |
| NB | 0.492650  | -0.002256 | -0.654014 |

Figure S26: Optimized structure of  $[\text{NbO}(\text{N}_3)_3 \cdot 2\text{CH}_3\text{CN}] 6(\text{G})$ .

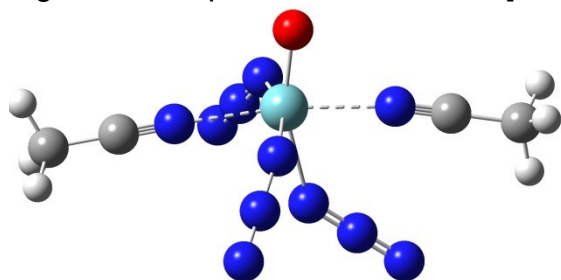

Cartesian Coordinates

B3LYP/DZVP2/cc-pVDZ-PP

0 1

|    |           |           |           |
|----|-----------|-----------|-----------|
| O  | -0.009202 | -0.000741 | -2.413942 |
| N  | 0.340703  | -2.034383 | -0.474409 |
| N  | 0.701810  | -2.767957 | 0.436176  |
| N  | 1.044746  | -3.516793 | 1.247079  |
| N  | -2.203313 | 0.000381  | -0.776247 |
| N  | 0.342654  | 2.033476  | -0.475577 |
| N  | 0.705461  | 2.766597  | 0.434628  |
| N  | 1.050358  | 3.514809  | 1.245348  |
| N  | 2.291537  | -0.000948 | -0.261663 |
| N  | -0.561501 | 0.000558  | 1.417688  |
| N  | -1.596249 | 0.001930  | 2.050156  |
| N  | -2.597709 | 0.003193  | 2.645685  |
| C  | -3.354372 | 0.001014  | -0.653229 |
| C  | 3.418115  | -0.000761 | 0.002533  |
| C  | 4.836774  | -0.000104 | 0.337119  |
| H  | 5.425580  | 0.111276  | -0.577541 |
| H  | 5.051826  | 0.833222  | 1.011511  |
| H  | 5.097809  | -0.942540 | 0.825984  |
| C  | -4.802928 | 0.001711  | -0.486176 |
| H  | -5.224707 | 0.894341  | -0.956136 |
| H  | -5.225788 | -0.889636 | -0.957593 |
| H  | -5.036719 | 0.001043  | 0.581406  |
| NB | 0.067576  | -0.000463 | -0.688771 |

Figure S27: Optimized structure of  $[\text{NbO}(\text{N}_3)_3 \cdot 2\text{CH}_3\text{CN}] 6(\text{H})$ .

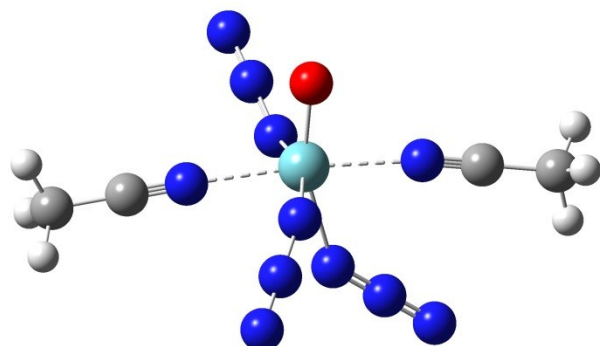

Cartesian Coordinates

B3LYP/DZVP2/cc-pVDZ-PP

0 1

|    |           |           |           |
|----|-----------|-----------|-----------|
| O  | 0.137650  | 0.963737  | -1.932951 |
| N  | -2.178729 | 0.298394  | -0.650143 |
| N  | 0.347544  | 1.872263  | 0.749773  |
| N  | 0.794455  | 2.985809  | 0.501455  |
| N  | 1.206086  | 4.054468  | 0.349164  |
| N  | 2.288815  | -0.058879 | 0.048782  |
| N  | 0.371982  | -1.745596 | -1.114987 |
| N  | 0.732883  | -2.813785 | -0.643007 |
| N  | 1.079414  | -3.849388 | -0.260955 |
| N  | -0.724787 | -0.735684 | 1.412996  |
| N  | -1.797215 | -0.930571 | 1.943653  |
| N  | -2.832341 | -1.115481 | 2.444506  |
| C  | -4.793986 | 0.285139  | -0.606044 |
| H  | -5.128217 | -0.113381 | 0.355133  |
| H  | -5.169385 | 1.303989  | -0.734597 |
| H  | -5.171173 | -0.344320 | -1.416675 |
| C  | 4.820120  | -0.398665 | 0.608572  |
| H  | 5.426737  | -0.075543 | -0.241913 |
| H  | 5.083195  | 0.194006  | 1.488876  |
| H  | 5.010957  | -1.456340 | 0.809430  |
| C  | -3.336188 | 0.294398  | -0.635252 |
| C  | 3.408992  | -0.209827 | 0.295870  |
| NB | 0.078934  | 0.176209  | -0.396199 |

## Literature

1. K. O. Christe, R. Haiges, J. A. Boatz, H. D. B. Jenkins, E. B. Garner and D. A. Dixon, *Inorg Chem*, 2011, **50**, 3752-3756.
2. Saint+, *Bruker AXS*, Madison WI, 2011.
3. L. Krause, R. Herbst-Irmer, G. M. Sheldrick and D. Stalke, *J. Appl. Crystallogr.*, 2015, **48**, 3-10.
4. SADABS, *Journal*, 2012.
5. C. B. Hübschle, G. M. Sheldrick and B. Dittrich, *Journal of Applied Crystallography*, 2011, **44**, 1281-1284.
6. G. M. Sheldrick, *Acta Crystallogr.*, 2015, **A71**, 3-8.
7. SHELXL, *Bruker AXS*, Madison WI, 2014.
8. SHELXTL, *Bruker AXS*, Madison WI, 2014.
9. L. J. Farrugia, *J. Appl. Crystallogr.*, 1997, **30**, 565-565.
